# Supplementary material for: Missed opportunities in hypertension risk factors screening in Indonesia: a mixed-methods evaluation of integrated health post (POSBINDU) implementation
Source: PubMed Central journal article supplement (PMC8862503; doi:10.1136/bmjopen-2021-051315), 2022-02-21
Supplement: bmjopen-2021-051315.draft_revisions.pdf [file bmjopen-2021-051315.draft_revisions.pdf]

# BMJ Open

BMJ Open is committed to open peer review. As part of this commitment we make the peer review history of every article we publish publicly available.

When an article is published we post the peer reviewers' comments and the authors' responses online. We also post the versions of the paper that were used during peer review. These are the versions that the peer review comments apply to.

The versions of the paper that follow are the versions that were submitted during the peer review process. They are not the versions of record or the final published versions. They should not be cited or distributed as the published version of this manuscript.

BMJ Open is an open access journal and the full, final, typeset and author-corrected version of record of the manuscript is available on our site with no access controls, subscription charges or pay-per-view fees (<http://bmjopen.bmj.com>).

If you have any questions on BMJ Open's open peer review process please email [info.bmjopen@bmj.com](mailto:info.bmjopen@bmj.com)

# BMJ Open

## Missed Opportunities in Hypertension Screening in Indonesia: Evaluation of Integrated Screening Post Implementation

|                               |                                                                                                                                                                                                                                                                                                                                                                                                                                                                                                                                                                                                                            |
|-------------------------------|----------------------------------------------------------------------------------------------------------------------------------------------------------------------------------------------------------------------------------------------------------------------------------------------------------------------------------------------------------------------------------------------------------------------------------------------------------------------------------------------------------------------------------------------------------------------------------------------------------------------------|
| Journal:                      | <i>BMJ Open</i>                                                                                                                                                                                                                                                                                                                                                                                                                                                                                                                                                                                                            |
| Manuscript ID                 | bmjopen-2021-051315                                                                                                                                                                                                                                                                                                                                                                                                                                                                                                                                                                                                        |
| Article Type:                 | Original research                                                                                                                                                                                                                                                                                                                                                                                                                                                                                                                                                                                                          |
| Date Submitted by the Author: | 16-Mar-2021                                                                                                                                                                                                                                                                                                                                                                                                                                                                                                                                                                                                                |
| Complete List of Authors:     | Widyaningsih, Vitri; Universitas Sebelas Maret, Public Health<br>Mashuri, Yusuf; Universitas Sebelas Maret, Parasitology<br>Febrinasari, Ratih; Universitas Sebelas Maret, Pharmacology<br>Pamungkasari, Eti; Universitas Sebelas Maret, Public Health<br>Sumardiyono, Sumardiyono; Universitas Sebelas Maret, Public Health<br>Balgis, Balgis; Universitas Sebelas Maret, Public Health<br>Koot, Jaap; University Medical Centre Groningen, Department of Health Sciences<br>Landsman-Dijkstra, Jeanet; University Medical Centre Groningen, Department of Health Sciences<br>Probandari, Ari; Universitas Sebelas Maret, |
| Keywords:                     | Hypertension < CARDIOLOGY, International health services < HEALTH SERVICES ADMINISTRATION & MANAGEMENT, PUBLIC HEALTH, Quality in health care < HEALTH SERVICES ADMINISTRATION & MANAGEMENT                                                                                                                                                                                                                                                                                                                                                                                                                                |
|                               |                                                                                                                                                                                                                                                                                                                                                                                                                                                                                                                                                                                                                            |

SCHOLARONE™  
Manuscripts

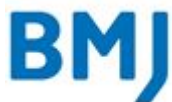

I, the Submitting Author has the right to grant and does grant on behalf of all authors of the Work (as defined in the below author licence), an exclusive licence and/or a non-exclusive licence for contributions from authors who are: i) UK Crown employees; ii) where BMJ has agreed a CC-BY licence shall apply, and/or iii) in accordance with the terms applicable for US Federal Government officers or employees acting as part of their official duties; on a worldwide, perpetual, irrevocable, royalty-free basis to BMJ Publishing Group Ltd ("BMJ") its licensees and where the relevant Journal is co-owned by BMJ to the co-owners of the Journal, to publish the Work in this journal and any other BMJ products and to exploit all rights, as set out in our [licence](#).

The Submitting Author accepts and understands that any supply made under these terms is made by BMJ to the Submitting Author unless you are acting as an employee on behalf of your employer or a postgraduate student of an affiliated institution which is paying any applicable article publishing charge ("APC") for Open Access articles. Where the Submitting Author wishes to make the Work available on an Open Access basis (and intends to pay the relevant APC), the terms of reuse of such Open Access shall be governed by a Creative Commons licence – details of these licences and which [Creative Commons](#) licence will apply to this Work are set out in our licence referred to above.

Other than as permitted in any relevant BMJ Author's Self Archiving Policies, I confirm this Work has not been accepted for publication elsewhere, is not being considered for publication elsewhere and does not duplicate material already published. I confirm all authors consent to publication of this Work and authorise the granting of this licence.

## Missed Opportunities in Hypertension Screening in Indonesia: Evaluation of Integrated Screening Post Implementation

Vitri Widyaningsih<sup>1</sup>, Yusuf Ari Mashuri<sup>1</sup>, Ratih Puspita Febrinasari<sup>1</sup>, Eti Poncorini Pamungkasari<sup>1</sup>, Sumardiyono<sup>1</sup>, Balgis<sup>1</sup>, Jaap Koot<sup>2</sup>, Jeanet Landsman-Dijkstra<sup>2</sup>, Ari Probandari<sup>1</sup> on behalf of Scaling Up Non-Communicable Disease Intervention in South East Asia (SUNISEA) Project

<sup>1</sup>Faculty of Medicine, Universitas Sebelas Maret, Surakarta, Indonesia

<sup>2</sup> University of Groningen, University Medical Center Groningen, Department of Health Sciences, The Netherlands

Corresponding author: Prof. dr. Ari Natalia Probandari, MPH., Ph.D. Faculty of Medicine Universitas Sebelas Maret Surakarta, 57126, Central Java, Indonesia [ari.probandari@staff.uns.ac.id](mailto:ari.probandari@staff.uns.ac.id)  
Phone: (0271) 646994

### Abstract

**Objectives:** To assess the implementation and contextual barriers of POSBINDU in Indonesia.

**Design:** This was a concurrent mixed-methods study, with a cross-sectional analysis of secondary data and Focus Group Discussions on stakeholder of POSBINDU.

**Setting:** The study was conducted in seven districts in three provinces in Indonesia, with approximately 50% of the primary health care (PHC) were selected as areas for data collection (n PHC=100).

**Participants:** From 475 POSBINDU, we collected secondary data from 54,224 participants. For the qualitative approach, 21 focus group discussions (FGDs) and 2 in-depth interviews were held among a total of 223 informants.

**Primary outcomes and measures:** Proportion of POSBINDU visitors getting the hypertension screening and risk factors' assessment, and barriers of POSBINDU implementation.

**Results:** Out of the 114,581 POSBINDU visits from 54,224 participants, most (80%) were female and adults over 50 years old (50%) showing a suboptimal coverage on male and younger adults. Approximately 95.1% of visitors were measured for blood pressure in their first visit; 35.3% of whom had elevated blood pressure. Less than 25% of the visitors reported to be interviewed for risk factors during their first visit, less than 80% had anthropometric measurements, and less than 15% had blood cholesterol examinations. We revealed lack of resources and limited time to perform the complexities of activities and reporting as main barrier for effective hypertension screening in Indonesia.

**Conclusions:** This study showed missed opportunities in hypertension screening in Indonesia. The barriers include a lack of access and implementation barriers (capability, resources, and protocols).

Keywords Noncommunicable diseases, hypertension, screening, community-based

### Article Summary

#### Findings

In a mixed-methods study, we found missed opportunities in hypertension screening in Indonesia. Several barriers include suboptimal coverage, complexities of activities and overlap between different NCD-related programs, and lack of resources.

#### Implications

1  
2  
3 There is a need to improve coverage and implementation of hypertension screening. An integrated  
4 approach to improve the implementation of hypertension screening, from guidelines to practice is  
5 crucial.  
6

### 7 **Strengths and Limitations of this study**

- 9 • The strength of this study was the relatively large evaluation of POSBINDU using a mixed-methods  
10 study design. Hence, providing more comprehensive information on POSBINDU implementation.
- 11 • The study limitation includes the difficulty in differentiating whether the missed reporting was  
12 due to lack of activities or lack of reporting.
- 13 • Nevertheless, both the activities and reporting are important in NCD screening, particularly in the  
14 follow up.  
15  
16

### 17 **Introduction**

18 The increasing trends of Non-Communicable Diseases (NCDs) in the world, including Indonesia,  
19 require targeted and specific primary and secondary prevention.[1,2] Hypertension, one of the most  
20 common NCDs, has a relatively high (33.4%) prevalence in Indonesia.[3,4] These figures are estimated  
21 to increase even further with the changing (more sedentary) lifestyle, unhealthy diet, rising prevalence  
22 of obesity, and the increasing life expectancy.[5] In 2015, hypertension attributed to 41% of all  
23 disability-adjusted life-years (DALYs), and was the leading risk factor for cardiovascular diseases.[6]  
24 Economically, hypertension is accounted for \$370 billion in medical costs per year worldwide.[7]  
25 Major modifiable risk factors for NCDs include smoking, alcohol consumption, unhealthy diet and  
26 obesity, and a sedentary lifestyle.[8,9] With the heavy burden and the economic cost of this disease,  
27 primary and secondary prevention for hypertension and its risk factors become very important.  
28  
29

30 In 2010, the WHO has recommended the implementation of Package of Essential Interventions for  
31 Non-Communicable (PEN) Diseases for low-middle income countries.[10] In response, the Ministry of  
32 Health (MOH) launched the Integrated Health Post (POSBINDU), as part of the PEN program in  
33 Indonesia. POSBINDU, a community-based program in hypertension screening and prevention[11],  
34 was added to the several existing NCD-related programs Indonesia. These include Prolanis (Program  
35 Pengendalian Penyakit Kronis), a community-based hypertension and diabetes management program  
36 affiliated with primary care[12] and Posyandu Lansia, a community-based NCD screening and  
37 management for the elderly.[13] Despite these efforts, the awareness and control of hypertension are  
38 still relatively low: only 25% of people with elevated blood pressure are aware of their condition, and  
39 only 54% of people diagnosed with hypertension take routine medication.[4,14,15] These conditions  
40 are still below the “rule of halves” for hypertension management, which recommends that 50% of  
41 hypertension patients be aware of their condition, with half of whom should be treated.[16,17]  
42  
43

44 A process evaluation is important in assessing the implementation, to identify barriers, and provide  
45 specific recommendations for improvement of POSBINDU. Previous studies have evaluated the  
46 effectiveness of the POSBINDU implementation.[11,18] However, they were lacking on the evaluation  
47 of contextual barriers in POSBINDU implementation. This study aims to portray the implementation  
48 of POSBINDU and its contextual barriers, to provide recommendations for better hypertension  
49 screening, and optimal linkage to care in Indonesia.  
50  
51

### 52 **Methods**

#### 53 **Setting**

54 POSBINDU is a community-based activity run by community health cadres (volunteers) and supervised  
55 by primary health care (PHC) officials. POSBINDU aims to empower communities in screening for NCDs  
56 and the risk factors, targeting individuals above 15 years old, particularly those of productive  
57  
58  
59  
60

1  
2  
3 age.[19,20] The main activities include screening for NCDs (mainly hypertension and diabetes) and the  
4 risk factors (i.e., smoking, diet, physical activity, obesity). Further, POSBINDU also provides health  
5 education and facilitate referral to PHC.[19]  
6

### 7 8 Study Design

9 This was a concurrent mixed-methods study in seven districts in three provinces in Indonesia (Central  
10 Java, East Java, and North Sumatra). We purposely selected provinces with relatively high prevalence  
11 of NCD based on a national health survey conducted in 2018.[21]  
12

### 13 Ethnical approval

14 The study was approved by the ethical review board at Universitas Gadjah Mada (Ethical Clearance  
15 Number KE/FK/0648/EC/2019). The participants of Focus Group Discussion gave informed consent  
16 before participating in this study.  
17

### 18 Data Collection

19 Within every one of the three provinces, we selected two districts: one city representing urban  
20 communities, and one district representing rural communities. In Central Java, an additional city was  
21 also selected. For each district, approximately 50% of the primary health care (PHC) were selected as  
22 areas for data collection (n PHC=100). Within the PHC, we collected data for quantitative process  
23 evaluation from all active POSBINDU in the areas (n POSBINDU=475). In most POSBINDU,  
24 online/electronic data were not available; Hence, data on participation were manually collected from  
25 the POSBINDU register. Data from 2018-2019 were collected, except for Central Java, in which data  
26 were available through September 2019. For the qualitative approach, 21 focus group discussions  
27 (FGDs) and 2 in-depth interviews were held among a total of 223 informants: 22 from Districts Health  
28 Department, 101 from Primary Health Care (PHC) facilities and 100 from POSBINDU cadres. The size  
29 of the FGDs was on average 10 (min 4, max 18). Verbatim transcripts of the FGD's were made for  
30 qualitative analyses.  
31  
32  
33  
34

### 35 Outcome

36 Missed opportunities in hypertension screening was quantified by the proportion of POSBINDU  
37 visitors getting the risk factors anamnesis, and measurement of anthropometric, blood pressure and  
38 cholesterol. We further explored the barriers of POSBINDU implementation using a qualitative  
39 approach.  
40

### 41 Analyses

42 Statistical analyses were conducted using STATA, to calculate the proportion of activities and  
43 outcomes. We further conduct Chi-square, T-test, and ANOVA to assess the statistical significance of  
44 the differences. Content analysis was applied for the qualitative data to ascertain barriers for the  
45 POSBINDU implementation in Indonesia by two independent researchers. Parallel analyses were  
46 conducted to synthesize the findings from the quantitative and qualitative approaches.  
47  
48

### 49 Patient and Public Involvement

50 Patients or the public were not directly involved in the design, or conduct, or reporting, or  
51 dissemination plans of our research.  
52  
53  
54

### 55 Results

#### 56 Participation of community for hypertension screening in POSBINDU

57 Data from 114,581 POSBINDU visits (54,224 participants) were analyzed. The findings showed similar  
58 patterns in the districts and provinces: more female and elderly participants. Approximately 80% were  
59  
60

female participants, with the highest proportion of female participants in rural North Sumatra (95.5%). Meanwhile, in Java, a higher proportion of female participants were observed in urban areas (Table 1).

Table 1. Characteristics of POSBINDU Participants within the Three Provinces in Indonesia (POSBINDU Register, 2018-2019)

| Characteristics              | North Sumatra |            | East Java  |            | Central Java |            | Total       |
|------------------------------|---------------|------------|------------|------------|--------------|------------|-------------|
|                              | Rural         | Urban      | Rural      | Urban      | Rural        | Urban      |             |
| Number of individuals        | 5,103         | 23,053     | 10,999     | 4,983      | 3,398        | 6,688      | 54,224      |
| Number of PHC                | 11            | 23         | 29         | 9          | 11           | 17         | 100         |
| Number of POSBINDU           | 38            | 283        | 38         | 27         | 27           | 62         | 475         |
| <b>Categorical (% , SE)</b>  |               |            |            |            |              |            |             |
| Female                       | 95.5 (0.3)    | 71.3 (0.4) | 76.2 (0.3) | 86.7 (0.5) | 73.7 (0.8)   | 88.2 (0.4) | 79.4 (0.2)  |
| Age                          |               |            |            |            |              |            |             |
| 15-24                        | 8.7 (0.4)     | 6.1 (0.3)  | 6.2 (0.2)  | 7.8 (0.4)  | 13.3 (0.7)   | 3.8 (0.3)  | 6.7 (0.1)   |
| 25-40                        | 26.7 (0.7)    | 14.9 (0.4) | 20.6 (0.3) | 32.2 (0.7) | 34.3 (1.0)   | 17.0 (0.6) | 22.2 (0.2)  |
| 40-49                        | 20.3 (0.6)    | 20.1 (0.4) | 21.7 (0.3) | 22.9 (0.6) | 22.1 (0.8)   | 22.3 (0.6) | 21.5 (0.2)  |
| 50-59                        | 21.8 (0.6)    | 27.6 (0.5) | 23.9 (0.3) | 21.6 (0.6) | 21.4 (0.8)   | 32.0 (0.7) | 24.8 (0.2)  |
| >60                          | 22.4 (0.6)    | 31.3 (0.6) | 27.6 (0.3) | 12.5 (0.5) | 8.9 (0.6)    | 24.9 (0.6) | 24.7 (0.2)  |
| Number of visits             |               |            |            |            |              |            |             |
| 1 time                       | 87.0 (0.4)    | 77.4 (0.3) | 68.4 (0.3) | 65.6 (0.7) | 84.5 (0.6)   | 56.4 (0.6) | 71.24 (0.1) |
| 2-6 times                    | 12.9 (0.5)    | 21.7 (0.3) | 21.1 (0.2) | 23.9 (0.6) | 13.3 (0.6)   | 35.1 (0.6) | 22.0 (0.1)  |
| 7-12 times                   | 0.1 (0.0)     | 0.6 (0.1)  | 6.3 (0.2)  | 6.0 (0.3)  | 2.1 (0.2)    | 5.9 (0.3)  | 5.3 (0.1)   |
| >12 times                    | 0 (0.0)       | 0.2 (0.1)  | 4.1 (0.1)  | 4.5 (0.3)  | 0.1 (0.0)    | 2.6 (0.2)  | 1.4 (0.1)   |
| <b>Continuous (mean, SE)</b> |               |            |            |            |              |            |             |
| Age                          | 46.4 (0.2)    | 51.7 (0.2) | 49.7 (0.1) | 43.4 (0.2) | 41.0 (0.3)   | 50.4 (0.2) | 48.6 (0.8)  |
| Number of visits             | 1.2 (0.8)     | 1.4 (0.1)  | 2.5 (0.2)  | 2.7 (0.5)  | 1.4 (0.2)    | 2.5 (0.3)  | 2.1 (0.1)   |

Despite the relatively high missing information on age (n missing= 12,084, or 22.3%), we found that the participants were on average of older age, with roughly 50% of participants aged over 50 years old (Table 1). The highest proportion of participants >60 years old were observed in rural East Java (31.3%), with mean age of 51.7 years old. We measured the youngest POSBINDU participants in rural Central Java (mean age 41.0 years old).

In the span of the two years of secondary data collection, we found that, on average, the participants visit POSBINDU twice, with the lowest average of visits in North Sumatra (rounded to 1 visit/participant). Approximately 38,628 (71.2%) of participants visit POSBINDU once for two years, and 761 (1.4%) visits POSBINDU more than 12 times.

Table 2. Missed Opportunity in Hypertension Screening and Risk Factors Characteristics within POSBINDU Participants (POSBINDU Register, 2018-2019)

| Characteristics | North Sumatra  |                | East Java      |                | Central Java   |                | Total |
|-----------------|----------------|----------------|----------------|----------------|----------------|----------------|-------|
|                 | Rural<br>%(SE) | Urban<br>%(SE) | Rural<br>%(SE) | Urban<br>%(SE) | Rural<br>%(SE) | Urban<br>%(SE) |       |

Missing Information in  
All Visits

|                             |            |            |            |            |            |            |            |
|-----------------------------|------------|------------|------------|------------|------------|------------|------------|
| N                           | 6,061      | 15,774     | 57,504     | 13,422     | 4,925      | 16,895     | 114,581    |
| Personal history (complete) | 99.3 (0.1) | 92.6 (0.2) | 67.9 (0.2) | 42.5 (0.4) | 62.1 (0.7) | 95.2 (0.2) | 73.8 (0.1) |
| Family history (complete)   | 99.4 (0.1) | 92.6 (0.2) | 65.1 (0.2) | 39.7 (0.4) | 61.6 (0.7) | 95.9 (0.2) | 72.1 (0.1) |
| Personal history (any)      | 88.2 (0.4) | 88.5 (0.3) | 56.4 (0.2) | 17.2 (0.3) | 54.2 (0.7) | 91.0 (0.2) | 62.9 (0.1) |
| Family history (any)        | 97.5 (0.2) | 88.9 (0.3) | 57.3 (0.2) | 28.9 (0.4) | 53.5 (0.7) | 93.8 (0.2) | 65.7 (0.1) |
| Height                      | 42.7 (0.6) | 19.0 (0.2) | 15.6 (0.2) | 20.7 (0.3) | 30.6 (0.7) | 23.3 (0.3) | 19.9 (0.1) |
| Weight measurement          | 35.8 (0.6) | 16.0 (0.2) | 18.8 (0.2) | 5.6 (0.2)  | 8.9 (0.4)  | 12.3 (0.3) | 16.4 (0.1) |
| Waist circumference         | 49.5 (0.6) | 36.0 (0.3) | 15.6 (0.2) | 12.7 (0.2) | 36.9 (0.6) | 63.6 (0.4) | 27.8 (0.1) |
| Blood pressure              | 1.8 (0.2)  | 5.8 (0.2)  | 9.8 (0.1)  | 4.6 (0.2)  | 4.2 (0.3)  | 6.3 (0.2)  | 7.4 (0.1)  |
| Blood cholesterol           | 87.0 (0.4) | 80.1 (0.3) | 81.9 (0.2) | 97.4 (0.1) | 91.1 (0.4) | 82.0 (0.3) | 84.2 (0.1) |

Missing Information in  
First Visits

|                             |            |            |            |            |            |            |            |
|-----------------------------|------------|------------|------------|------------|------------|------------|------------|
| N                           | 5,103      | 23,053     | 10,999     | 4,983      | 3,398      | 6,688      | 54,224     |
| Personal history (complete) | 99.2 (0.1) | 89.9 (0.3) | 72.8 (0.3) | 35.1 (0.7) | 49.3 (0.9) | 92.6 (0.3) | 76.3 (0.2) |
| Family history (complete)   | 99.3 (0.1) | 89.8 (0.3) | 71.3 (0.3) | 41.4 (0.7) | 50.9 (0.9) | 93.5 (0.3) | 76.4 (0.2) |
| Personal history (any)      | 88.2 (0.5) | 85.1 (0.3) | 58.3 (0.3) | 15.3 (0.5) | 40.1 (0.8) | 86.9 (0.4) | 68.3 (0.2) |
| Family history (any)        | 97.3 (0.2) | 85.2 (0.3) | 60.6 (0.3) | 30.0 (0.6) | 40.1 (0.8) | 90.5 (0.4) | 65.0 (0.2) |
| Height                      | 41.8 (0.7) | 19.0 (0.4) | 14.8 (0.2) | 21.1 (0.6) | 20.4 (0.7) | 23.0 (0.5) | 20.1 (0.2) |
| Weight                      | 35.3 (0.3) | 15.0 (0.3) | 16.7 (0.2) | 47.6 (0.3) | 7.2 (0.4)  | 12.9 (0.4) | 15.9 (0.1) |
| Waist circumference         | 48.9 (0.7) | 33.6 (0.4) | 11.1 (0.2) | 12.9 (0.5) | 23.0 (0.7) | 66.1 (0.6) | 26.9 (0.2) |
| Blood pressure              | 1.7 (0.2)  | 5.4 (0.2)  | 4.9 (0.1)  | 5.0 (0.3)  | 3.2 (0.3)  | 7.0 (0.3)  | 4.9 (0.1)  |
| Blood cholesterol           | 86.1 (0.5) | 75.7 (0.4) | 76.6 (0.3) | 97.9 (0.2) | 92.3 (0.4) | 79.1 (0.5) | 80.6 (0.2) |

Risk Factors Screening  
in All Visits

|              |            |            |            |            |            |            |            |
|--------------|------------|------------|------------|------------|------------|------------|------------|
| BMI          |            |            |            |            |            |            |            |
| Normal       | 48.3 (0.9) | 48.2 (0.5) | 51.3 (0.2) | 44.6 (0.5) | 52.3 (0.9) | 46.4 (0.4) | 49.3 (0.2) |
| Underweight  | 4.9 (0.4)  | 4.5 (0.2)  | 8.0 (0.1)  | 4.5 (0.2)  | 9.1 (0.5)  | 3.8 (0.2)  | 6.3 (0.1)  |
| Overweight   | 31.9 (0.8) | 34.4 (0.4) | 30.8 (0.2) | 34.7 (0.4) | 29.1 (0.8) | 34.2 (0.4) | 32.3 (0.2) |
| Obese        | 14.9 (0.6) | 12.9 (0.3) | 10.0 (0.3) | 16.3 (0.4) | 9.4 (0.5)  | 15.7 (0.3) | 12.1 (0.1) |
| Hypertension | 35.4 (0.6) | 28.0 (0.4) | 42.5 (0.2) | 33.7 (0.4) | 25.6 (0.6) | 35.9 (0.4) | 37.2 (0.1) |

Risk Factors Screening  
in First Visits

|              |            |            |            |            |            |            |            |
|--------------|------------|------------|------------|------------|------------|------------|------------|
| BMI          |            |            |            |            |            |            |            |
| Normal       | 49.3 (0.9) | 48.0 (0.5) | 51.5 (0.4) | 45.3 (0.8) | 52.4 (1.0) | 44.4 (0.7) | 49.3 (0.2) |
| Underweight  | 4.8 (0.4)  | 4.5 (0.2)  | 7.7 (0.2)  | 5.1 (0.4)  | 10.1 (0.6) | 4.2 (0.3)  | 6.3 (0.1)  |
| Overweight   | 32.0 (0.9) | 34.2 (0.5) | 30.4 (0.3) | 33.3 (0.8) | 28.7 (0.9) | 35.1 (0.7) | 32.0 (0.2) |
| Obese        | 13.9 (0.6) | 13.3 (0.4) | 10.4 (0.2) | 16.3 (0.6) | 8.8 (0.5)  | 16.3 (0.5) | 12.4 (0.2) |
| Hypertension | 34.5 (0.7) | 28.5 (0.4) | 40.5 (0.3) | 31.6 (0.7) | 25.1 (0.8) | 37.9 (0.6) | 35.3 (0.2) |

Within province, rural-urban comparisons are significant at 0.05

Between provinces comparisons are significant at 0.05

We further observed the relatively high missing information for hypertension screening across the districts, with the following general pattern; First, a relatively high proportion of missing information concerning the personal and family history, with East Java having the lowest proportion. Second, a



relatively lower missing data on anthropometric measurements (less than 50%). Third, we found the highest proportion of available data for blood pressure measurements in all the seven districts. Last, our analysis identified higher missing values for blood cholesterol measurements (84.2%). For all measurements, there were significant differences between the three provinces, as well as between the rural and urban areas within the provinces (Table 2).

Based on available data, we found that obesity seems to be more prevalent in urban areas in Java, but relatively similar in North Sumatra. In contrast, hypertension was more prevalent in a rural area for East Java and North Sumatra but was more common in urban districts of Central Java (Table 2). However, these data should be interpreted cautiously due to the relatively high missing data on the measurements.

#### Barriers for the screening of hypertension in POSBINDU

The qualitative data supported the quantitative finding about lacking participation of male and younger population to POSBINDU. In the FGDs, cadres and health officials stated the barriers for male and younger participants to attend POSBINDU, including the inconvenience of POSBINDU schedule, as well as low awareness for hypertension screening (Table 3).

Table 3. Qualitative analyses of Focus Group Discussion amongst POSBINDU Cadres, Primary Health Care and Health Department Officials

| Themes                                                     | Category                                                                               | Codes                                                                |
|------------------------------------------------------------|----------------------------------------------------------------------------------------|----------------------------------------------------------------------|
| Suboptimal target population and gap in policy             | Participants' characteristics                                                          | Younger adults rarely participate                                    |
|                                                            |                                                                                        | Lack of male participants                                            |
|                                                            | Barrier to participations                                                              | Schedule incompatibility                                             |
|                                                            |                                                                                        | Low awareness for screening                                          |
|                                                            |                                                                                        | Lack of role model for screening                                     |
|                                                            | Ineffective policy and coordination                                                    | Lack of prioritization for NCD                                       |
|                                                            |                                                                                        | Implementation gap of national policy/program at the local level     |
|                                                            |                                                                                        | The need for coordination with different stakeholders                |
|                                                            |                                                                                        | The need for coordination among NCD-related programs                 |
|                                                            | Lack of human resources in terms of capability and quantity for hypertension screening | Cadres have multiple tasks, with time constraints                    |
| Cadres are volunteers with other obligations               |                                                                                        |                                                                      |
| Cadres' competencies                                       |                                                                                        | Lack of knowledge on hypertension and other NCD                      |
|                                                            |                                                                                        | Lack of ability to conduct measurements and provide health education |
|                                                            |                                                                                        | Lack of ability to conduct recording and reporting                   |
| Lack of NCD program officers for supervision and reporting |                                                                                        | Lack of NCD program officers at PHC                                  |
|                                                            |                                                                                        | Most program officers are responsible for multiple tasks/programs    |
|                                                            |                                                                                        | Lack of reporting officers                                           |
| Provision of Referral Counselling                          |                                                                                        | The participant with hypertension is not always referred to PHC      |

|                                                             |                                                  |                                                                                  |
|-------------------------------------------------------------|--------------------------------------------------|----------------------------------------------------------------------------------|
|                                                             |                                                  | Lack of counseling to participants before the referral made                      |
|                                                             |                                                  | POSBINDU has referral form, but rarely used                                      |
|                                                             |                                                  | Treatment for the referral is covered by their health insurance                  |
| Lack of resources for hypertension screening and prevention | Equipment for hypertension screening             | The equipment is sometimes incomplete                                            |
|                                                             |                                                  | Equipment maintenance is inadequate                                              |
|                                                             |                                                  | Limited logistics for cholesterol measurement                                    |
|                                                             | Lack of budget                                   | POSBINDU is funded by the government, stakeholder (private sectors) or community |
|                                                             |                                                  | Lack of budget for POSBINDU activities                                           |
|                                                             |                                                  | Lack of budget for cadres training and incentives                                |
|                                                             | Health education material                        | Lack of health education materials                                               |
|                                                             | Infrastructure for recording and reporting       | Not all cadres have laptops                                                      |
|                                                             |                                                  | Limited internet connection in some areas                                        |
| Most POSBINDU stations use manual reporting                 |                                                  |                                                                                  |
| Time constraints for implementation based on MOH standard   | The complexity of activities and time limitation | The time required for examination is too long                                    |
|                                                             |                                                  | Too many information needs to be asked and filled out                            |
|                                                             |                                                  | The referral form is rarely used                                                 |
|                                                             | The complexity of reporting forms                | Many forms need to be filled, while time is limited                              |
|                                                             |                                                  | A simplified form in checklist format is preferred                               |

The need for role model from community leader to improve participation and the barrier for participation, particularly among males is highlighted by these quotes:

*“ Yes, we don’t have a lot of men (participants), because they are working “ (Cadre, FGD#21)*

*“ In our POSBINDU, the awareness for early screening is still low. Only several people come (to POSBINDU), younger people don’t want to come because (POSBINDU is conducted) during working days “ (Cadre, FGD#3)*

*“ ...Socialization for this (hypertension screening) is needed, often, the community leader in our area don’t want to participate because they are afraid to be screened” (Cadre, FGD#2)*

Lack of priority and overlap of NCD-related programs also contribute to a suboptimal target population of POSBINDU, as illustrated by the following quote:

*“ (NCD) is not a priority program, hence, there’s a lack of commitment between the superior (health department) with the program officials, for example.” (Health official, FGD#7)*  
*“...(different department in) the Ministry of Health focus on specific diseases, such as diabetes and cancer... However, in the community, (the programs) become general. (We) run Polindes, (Posyandu) Lansia, POSBINDU, School Health Program. In my opinion, the regulation is rigid and detailed, but the implementation is mixed (overlap). If we want to give optimum results, it takes efforts.” (Health official, FGD#10).*

Several barriers for implementation were revealed. The cadres and health officers often have to run several different programs. The FGDs also revealed a lack of capability of cadres to conduct

1  
2  
3 measurements for hypertension screening, providing health education, and also conducting the  
4 recording and reporting of the POSBINDU activities and measurements. The informants also  
5 mentioned a lack of resources, including budget, equipment, and logistics to conduct all the  
6 measurements.  
7

8  
9 *“ One person can hold 5 positions in PHC activities... POSBINDU cadres, Posyandu Lansia cadres,  
10 and other programs.. ” (Cadre, FGD#11)*

11  
12 *“ (cadres of) Posbindu do not have laptop nor cell phone for the reporting application (of  
13 POSBINDU), hence, we report to PHC manually” (Cadre, FGD#14)*

14  
15 The barriers also include the complexities of the activities and measurements, as well as extensive  
16 reporting forms, which require a long time to be completed.

17  
18 *“ ...it takes a long time, because of the measurements and stages (of POSBINDU activities) ” (PHC  
19 officer, FGD#8)*

20  
21 *“ ...POSBINDU report is too time-consuming, because it is long (detail), including identity, cell  
22 phone number, address, and others... and it has to be filled out every month.” (PHC officer,  
23 FGD#6)*

24  
25 Interestingly, in several districts, we found the implementation of mobile POSBINDU, moving from  
26 one community to the other within the same subdistricts.

27  
28 *“Our POSBINDU is mobile, we have ten communities, so every week, we move from one  
29 community to the next, focusing on people 15-59 years old.” (Cadre, FGD#18)*

30  
31 We further synthesized the quantitative and qualitative results. We categorized the barriers into three  
32 main parts: 1) input, reflecting the target population/coverage of POSBINDU, 2) process, describing  
33 the implementation of POSBINDU activities, and 3) output, reflecting the recording and reporting  
34 process of POSBINDU (Figure 1). Results show that in both approaches we found lacking participation  
35 of male and younger people in POSBINDU. Lack of priority for NCD screening and ineffective  
36 coordination among stakeholders, combined with lack of awareness and access might attribute to this  
37 finding. The high missed opportunity, particularly in history taking and measurements, were likely due  
38 to the complexity of the activities/measurements, as well as lack of resources. The high missing data  
39 also stem from the complexity of the forms and lack of capability for online reporting.  
40  
41

42  
43 Insert Figure 1 here

#### 44 45 Discussion

46 In this study, we revealed missed opportunities in input, activities, and output of POSBINDU  
47 implementation. Several contextual barriers were identified. The suboptimal coverage was possibly  
48 due to lack of priority for NCD screening, lack of awareness and access, and overlap of NCD-related  
49 program. The suboptimal activities and reporting were likely caused by a lack of resources, as well as  
50 limited time to perform the complexities of activities and reporting according to MOH guideline.  
51

52  
53 The missed opportunity to screen male and younger population that we found in this study is  
54 particularly concerning. Although the prevalence is lower than of the older population, hypertension  
55 prevalence among young Indonesian is still relatively high (28%).[22] While the target population of  
56 POSBINDU is listed as those 15 years or older, the elderly are usually targeted in Posyandu Lansia, a  
57 community-based screening and management for the elderly population.[23] Awareness is also lower  
58 in male and younger adults, signaling the need to screen this population.[3] Ideally, POSBINDU  
59  
60

1  
2  
3 becomes the “gatekeeper” for screening in the community. Hypertensive and diabetic patients were  
4 then referred to PHC and joined Prolanis, a community-based activity funded by the health insurance  
5 program, for management of chronic diseases patients.[12]  
6

7  
8 Furthermore, with a lack of male participation, POSBINDU is missing one of the key target populations  
9 for risk factors screening: smokers. Analysis of a national survey in 2014 reported 32% prevalence of  
10 smoking, with approximately 40% of males aged 15-55 years old and 14% of male adolescents are  
11 current smokers.[24–26] Further, 20% of Indonesia’s total chronic diseases are attributed to smoking,  
12 with hypertension as the highest proportion.[27] Screening for hypertension and its risk factors  
13 earlier, combined with lifestyle-based interventions effectively avoid future complications.[28,29]  
14

15  
16 We also revealed the need to prioritize and reorganize the current NCD-related programs, to address  
17 the suboptimal coverage and the overlap. An example of the gap between the national  
18 recommendation and local implementation is reflected in the coordination of existing NCD-related  
19 programs: POSBINDU, Posyandu Lansia, and PANDU PTM. In the MOH, the PANDU PTM and  
20 POSBINDU are regulated under the Directorate for Disease Management, while Posyandu Lansia is  
21 under the Directorate of Public Health. Despite the different directorates, the implementation at  
22 community level is often conducted simultaneously and often overlap. Reporting, however, is  
23 conducted separately. Hence, as previous studies have noted, we also recommend the need of  
24 comprehensive and coordinated NCD prevention program in Indonesia.[30–32]  
25  
26

27  
28 The relatively high missed opportunity in hypertension screening portrays suboptimal implementation  
29 of POSBINDU. This can be caused by a lack of recording and reporting (monitoring and evaluation  
30 fidelity) or lack of measurement (implementation fidelity). Lack of human resources might contribute  
31 to the suboptimal implementation of POSBINDU. Our findings revealed the need to train cadres to  
32 improve their skills and efficiency in conducting the measurements and history taking. This is in line  
33 with findings from Meinema et al (2017 and Abdell-All et al (2018)[33,34]. Our findings also imply the  
34 complexities of the activities and reporting of POSBINDU which lead to ineffective implementation. It  
35 is important to ensure that valuable screening information can be recorded and followed up, for better  
36 intervention. A simplified screening program with integrated reporting is needed.  
37

38  
39 In this study, we also discovered lack of financial and equipment as barrier to POSBINDU  
40 implementation. The integration of POSBINDU and PANDU PTM to the national health insurance  
41 scheme might be important to ensure the sustainability of funding for the program. Integration of  
42 POSBINDU into the national health insurance can also improve participation of the working  
43 population, most of whom are covered by the national health insurance.[35] Previous studies have  
44 reported an increase in uptake of service by health insurance membership.[36–38]  
45

46  
47 Based on our findings, we identified two main areas that needs to be improved: coverage and  
48 implementation of POSBINDU. To improve coverage of POSBINDU, there are two important steps that  
49 we recommend. First, an integrated approach with collaboration amongst different programs and  
50 directorates to reduce the overlap and simplify the POSBINDU implementation at the PHC and  
51 community level. PANDU PTM as the adaptation of WHO PEN,[39] needs to be implemented in a  
52 wider scale. Second, redirecting the target population of hypertension screening, to cover also  
53 younger and male population. A workplace-based screening program which can address the barriers  
54 identified in the qualitative findings is recommended.[40,41] For this younger population, the use of  
55 mobile technology for monitoring of risk factors and measurement might be effective. Previous  
56 studies have reported the effectiveness of mobile health for hypertension screening and risk  
57 stratification.[42,43]  
58  
59  
60

To improve the implementation and components of POSBINDU activities, a simplified algorithm to screen and refer the target population is needed. The algorithm needs to be developed both in the electronic format and manual format to address the different capabilities of community cadres and resources in the community. Simplifying the program and reporting systems will also reduce the workload of PHC and district health officials. Further, a clear algorithm for the management of “screened” cases to PHC is important. The readiness of the PHCs also needs to be improved to adequately manage the potential surge in referred cases. Lastly, there is a need to integrate hypertension and NCD screening program into the national health insurance system. Hence, ensuring the sustainability of funding and resources of the program. With these approaches, comprehensive screening for hypertension and NCD along the continuum of care might be more effective.

This study has several limitations. First, the proportion of our measures are not reflective for the whole target population of POSBINDU, since the participants were mostly female and of older age. The characteristics of our sample, which are generally older with a higher proportion of females, drive the proportion higher than that of the general population in Indonesia. However, this study reflects the current participants of POSBINDU. Second, we used a secondary data collection by POSBINDU cadres, the missingness that we presented in this study probably stem from two main sources: lacking in reporting or a true lack in measurement/activities. Nevertheless, both the activities and reporting are important in NCD screening, particularly in the follow-up.

Despite the limitation, there are several strengths of the study: First, to our knowledge, this was the first relatively large evaluation of POSBINDU. Second, the use of a mixed-methods study design. Therefore, providing more comprehensive information on POSBINDU implementation. Third, the study also investigates the contextual factors that should be addressed in the improvement of the community-based hypertension screening program in Indonesia.

### Conclusion

This study showed the missed opportunities of POSBINDU for hypertension screening in Indonesia. The barriers include a lack priority for NCDs, lack of awareness and access for subpopulation, and several implementation barriers: capability, resources, and protocols. An innovative approach to simplify and improve the capacity of POSBINDU is in preparation to optimize the screening and linkage to care of hypertension in Indonesia. This study provides evidence-based recommendations in improving the current implementation of POSBINDU, in the Indonesian context.

### Data Statement

The de-identified data from this study is available upon request to the corresponding or first author pending thorough review of request and adherence to the Indonesian government regulation on data sharing.

### Author Contributions

VW, AP, RFP, EP, YM, JK and JLD contributed in the design of the study. VW, A, RFP, EP, YM, B, and M participate actively in study implementation, including in data collection. VW, YM, S, and RFP analyzed the quantitative data. AP, EP, and B analyzed the qualitative data. VW, AP, RFP, S, and YM draft the manuscript with all co-authors revised critically. All authors read and approved the final manuscript.

### Funding

This work was supported by the Horizon 2020 research program of the European Union, with grant number 825026.

### Conflict of Interest

None declared

### License

The Corresponding Author has the right to grant on behalf of all authors and does grant on behalf of all authors, an exclusive licence (or non exclusive for government employees) on a worldwide basis to the BMJ Publishing Group Ltd ("BMJ"), and its Licensees to permit this article (if accepted) to be published in The BMJ's editions and any other BMJ products and to exploit all subsidiary rights, as set out in our licence.

### Acknowledgment

This study was co-financed by the Horizon 2020 research program of the European Union, under grant 825026 Scaling Up NCD interventions in South East Asia.

### References

- 1 Basu S, Millett C. Social epidemiology of hypertension in middle-income countries: Determinants of prevalence, diagnosis, treatment, and control in the WHO SAGE study. *Hypertension* 2013;**62**:18–26. doi:10.1161/HYPERTENSIONAHA.113.01374
- 2 Mills KT, Bundy JD, Kelly TN, *et al*. Global disparities of hypertension prevalence and control. *Circulation* 2016;**134**:441–50. doi:10.1161/CIRCULATIONAHA.115.018912
- 3 Hussain MA, Al Mamun A, Reid C, *et al*. Prevalence, awareness, treatment and control of hypertension in Indonesian adults aged  $\geq 40$  years: Findings from the Indonesia Family Life Survey (IFLS). *PLoS One* 2016;**11**:1–16. doi:10.1371/journal.pone.0160922
- 4 Peltzer K, Pengpid S. The Prevalence and Social Determinants of Hypertension among Adults in Indonesia: A Cross-Sectional Population-Based National Survey. *Int J Hypertens* 2018;**2018**. doi:10.1155/2018/5610725
- 5 Purnamasari D. The Emergence of Non-communicable Disease in Indonesia. *Acta Med Indones* 2018;**50**:273–4. <http://www.ncbi.nlm.nih.gov/pubmed/30630990>
- 6 Vos T, Abajobir AA, Abbafati C, *et al*. Global, regional, and national incidence, prevalence, and years lived with disability for 328 diseases and injuries for 195 countries, 1990–2016: A systematic analysis for the Global Burden of Disease Study 2016. *Lancet* 2017;**390**:1211–59. doi:10.1016/S0140-6736(17)32154-2
- 7 Gaziano T. Prevention and treatment of chronic diseases in developing countries. 2011;:1–20. <http://www.un.org/esa/population/publications/expertpapers/2011-2-gaziano.pdf>
- 8 Allen L, Williams J, Townsend N, *et al*. Socioeconomic status and non-communicable disease behavioural risk factors in low-income and lower-middle-income countries: a systematic review. *Lancet Glob Heal* 2017;**5**:e277–89. doi:10.1016/S2214-109X(17)30058-X
- 9 Rosengren A, Smyth A, Rangarajan S, *et al*. Socioeconomic status and risk of cardiovascular disease in 20 low-income, middle-income, and high-income countries: the Prospective Urban Rural Epidemiologic (PURE) study. *Lancet Glob Heal* 2019;**7**:e748–60. doi:10.1016/S2214-109X(19)30045-2
- 10 WHO. Package of Essential Noncommunicable (PEN) Disease Interventions for Primary Health Care. *Geneva World Heal Organ* 2010;:1–66. [papers2://publication/uuid/FC98856B-4122-4325-826F-20FA6B89DEBD](https://publications.uu.id/publication/uuid/FC98856B-4122-4325-826F-20FA6B89DEBD)
- 11 Ferdianto A, Tamtomo DG, Sulaeman ES. Does the Integrated Health Post have Contextual

- 1  
2  
3 Effect on Tertiary Preventive Behavior among Hypertensive Patients? A Multilevel Analysis  
4 Evidence from Surakarta. *J Heal Promot Behav* 2019;**4**:224–34.  
5 doi:10.26911/thejhp.2019.04.03.07  
6
- 7 12 Khoe LC, Wangge G, Soewondo P, *et al.* The implementation of community-based diabetes  
8 and hypertension management care program in Indonesia. *PLoS One* 2020;**15**:1–9.  
9 doi:10.1371/journal.pone.0227806  
10
- 11 13 Yamada M, Hapsari ED, Matsuo H. Behaviors toward noncommunicable diseases prevention  
12 and their relationship with physical health status among community-dwelling, middleaged  
13 and older women in Indonesia. *Int J Environ Res Public Health* 2020;**17**.  
14 doi:10.3390/ijerph17072332  
15
- 16 14 Maharani A, Sujarwoto, Praveen D, *et al.* Cardiovascular disease risk factor prevalence and  
17 estimated 10-year cardiovascular risk scores in Indonesia: The SMARThealth Extend study.  
18 *PLoS One* 2019;**14**:1–13. doi:10.1371/journal.pone.0215219  
19
- 20 15 Turana Y, Tengkwawan J, Soenarta AA. Asian management of hypertension: Current status,  
21 home blood pressure, and specific concerns in Indonesia. *J Clin Hypertens* 2020;**22**:483–5.  
22 doi:10.1111/jch.13681  
23
- 24 16 Scheltens T, Bots ML, Numans ME, *et al.* Awareness, treatment and control of hypertension:  
25 The ‘rule of halves’ in an era of risk-based treatment of hypertension. *J Hum Hypertens*  
26 2007;**21**:99–106. doi:10.1038/sj.jhh.1002123  
27
- 28 17 Chen R, Tunstall-Pedoe H, Morrison C, *et al.* Trends and social factors in blood pressure  
29 control in Scottish MONICA surveys 1986-1995: The rule of halves revisited. *J Hum Hypertens*  
30 2003;**17**:751–9. doi:10.1038/sj.jhh.1001612  
31
- 32 18 Alfiah A, Pujiyanto P. an Analysis on the Implementation of the Integrated Guidance Post  
33 (Posbindu) Activities for Non-Communicable Diseases At Bogor City in 2018. *J Indones Heal*  
34 *Policy Adm* 2019;**4**:11–5. doi:10.7454/ihpa.v4i1.2388  
35
- 36 19 Ministry of Health (MOH) - Kementerian Kesehatan. Petunjuk Teknis Pos Pembinaan Terpadu  
37 Penyakit Tidak Menular (Posbindu PTM). 2012.  
38 [http://p2ptm.kemkes.go.id/uploads/2016/10/Petunjuk-Teknis-Pos-Pembinaan-Terpadu-](http://p2ptm.kemkes.go.id/uploads/2016/10/Petunjuk-Teknis-Pos-Pembinaan-Terpadu-Penyakit-Tidak-Menular-POSBINDU-PTM-2013.pdf)  
39 [Penyakit-Tidak-Menular-POSBINDU-PTM-2013.pdf](http://p2ptm.kemkes.go.id/uploads/2016/10/Petunjuk-Teknis-Pos-Pembinaan-Terpadu-Penyakit-Tidak-Menular-POSBINDU-PTM-2013.pdf)  
40
- 41 20 Moeloek NF. Indonesia national health policy in the transition of disease burden and health  
42 insurance coverage. *Med J Indones* 2017;**26**:3–6. doi:10.13181/mji.v26i1.1975  
43
- 44 21 Ministry of Health (MOH) - Kementerian Kesehatan. Riskesdas Main Results 2018. 2018.  
45 <https://www.litbang.kemkes.go.id/hasil-utama-riskesdas-2018/>  
46
- 47 22 Sudharsanan N, Geldsetzer P. Impact of coming demographic changes on the number of  
48 adults in need of care for hypertension in Brazil, China, India, Indonesia, Mexico, and South  
49 Africa: A modeling study. *Hypertension* 2019;**73**:770–6.  
50 doi:10.1161/HYPERTENSIONAHA.118.12337  
51
- 52 23 Rahmawati R, Bajorek B V. Access to medicines for hypertension: A survey in rural Yogyakarta  
53 province, Indonesia. *Rural Remote Health* 2018;**18**. doi:10.22605/RRH4393  
54
- 55 24 Amalia B, Cadogan SL, Prabandari YS, *et al.* Socio-demographic inequalities in cigarette  
56 smoking in Indonesia, 2007 to 2014. *Prev Med (Baltim)* 2019;**123**:27–33.  
57 doi:10.1016/j.ypmed.2019.02.025  
58
- 59 25 Sujarwoto S. Sleep Disturbance in Indonesia: How Much Does Smoking Contribute? *Behav*  
60

- 1  
2  
3  
4  
5  
6  
7  
8  
9  
10  
11  
12  
13  
14  
15  
16  
17  
18  
19  
20  
21  
22  
23  
24  
25  
26  
27  
28  
29  
30  
31  
32  
33  
34  
35  
36  
37  
38  
39  
40  
41  
42  
43  
44  
45  
46  
47  
48  
49  
50  
51  
52  
53  
54  
55  
56  
57  
58  
59  
60
- Sleep Med* 2019;**00**:1–14. doi:10.1080/15402002.2019.1682584
- 26 Kusumawardani N, Tarigan I, Suparmi, *et al.* Socio-economic, demographic and geographic correlates of cigarette smoking among Indonesian adolescents: results from the 2013 Indonesian Basic Health Research (RISKESDAS) survey. *Glob Health Action* 2018;**11**. doi:10.1080/16549716.2018.1467605
- 27 Kristina SA, Endarti D, Wiedyaningsih C, *et al.* Health Care Cost of Noncommunicable Diseases Related to Smoking in Indonesia, 2015. *Asia-Pacific J Public Heal* 2018;**30**:29–35. doi:10.1177/1010539517751311
- 28 Saif-Ur-Rahman KM, Hasan M, Hossain S, *et al.* Non-pharmacological interventions for the prevention of hypertension in low-income and middle-income countries: Protocol for a systematic review and meta-analysis. *BMJ Open* 2018;**8**:6–11. doi:10.1136/bmjopen-2017-020724
- 29 Pantell MS, Prather AA, Downing JM, *et al.* Association of Social and Behavioral Risk Factors With Earlier Onset of Adult Hypertension and Diabetes. *JAMA Netw open* 2019;**2**:e193933. doi:10.1001/jamanetworkopen.2019.3933
- 30 Kusuma D, Kusumawardani N, Ahsan A, *et al.* On the verge of a chronic disease epidemic: Comprehensive policies and actions are needed in Indonesia. *Int Health* 2019;**11**:422–4. doi:10.1093/inthealth/ihz025
- 31 Mboi N, Murty Surbakti I, Trihandini I, *et al.* On the road to universal health care in Indonesia, 1990–2016: a systematic analysis for the Global Burden of Disease Study 2016. *Lancet* 2018;**392**:581–91. doi:10.1016/S0140-6736(18)30595-6
- 32 Jayanna K, Swaroop N, Kar A, *et al.* Designing a comprehensive Non-Communicable Diseases (NCD) programme for hypertension and diabetes at primary health care level: Evidence and experience from urban Karnataka, South India. *BMC Public Health* 2019;**19**:1–12. doi:10.1186/s12889-019-6735-z
- 33 Meinema JG, Haafkens JA, Jaarsma DADC, *et al.* Development and evaluation of a culturally appropriate hypertension education (CAHE) training program for health care providers. *PLoS One* 2017;**12**:1–13. doi:10.1371/journal.pone.0178468
- 34 Abdel-All M, Thrift AG, Riddell M, *et al.* Evaluation of a training program of hypertension for accredited social health activists (ASHA) in rural India. *BMC Health Serv Res* 2018;**18**:1–11. doi:10.1186/s12913-018-3140-8
- 35 Ng JYS, Ramadani RV, Hendrawan D, *et al.* National Health Insurance Databases in Indonesia, Vietnam and the Philippines. *PharmacoEconomics - Open* 2019;**3**:517–26. doi:10.1007/s41669-019-0127-2
- 36 Erlangga D, Ali S, Bloor K. The impact of public health insurance on healthcare utilisation in Indonesia: evidence from panel data. *Int J Public Health* 2019;**64**:603–13. doi:10.1007/s00038-019-01215-2
- 37 Sharma M, Teerawattananon Y, Luz A, *et al.* Institutionalizing Evidence-Informed Priority Setting for Universal Health Coverage: Lessons From Indonesia. *Inq (United States)* 2020;**57**. doi:10.1177/0046958020924920
- 38 Vidyattama Y, Miranti R, Resosudarmo BP. The Role of Health Insurance Membership in Health Service Utilisation in Indonesia. *Bull Indones Econ Stud* 2014;**50**:393–413. doi:10.1080/00074918.2014.980380



- 1  
2  
3 39 Ministry of Health (MOH) - Kementerian Kesehatan. Pandu PTM A Community on  
4 intervention model and control's of NCD's. 2017.  
5  
6 40 Wang Z, Wang X, Shen Y, *et al.* Effect of a Workplace-Based Multicomponent Intervention on  
7 Hypertension Control: A Randomized Clinical Trial. *JAMA Cardiol* 2020;**5**:567–75.  
8 doi:10.1001/jamacardio.2019.6161  
9  
10 41 Reif J, Chan D, Jones D, *et al.* Effects of a Workplace Wellness Program on Employee Health,  
11 Health Beliefs, and Medical Use: A Randomized Clinical Trial. *JAMA Intern Med*  
12 2020;**180**:952–60. doi:10.1001/jamainternmed.2020.1321  
13  
14 42 Patel A, Praveen D, Maharani A, *et al.* Association of Multifaceted Mobile Technology-  
15 Enabled Primary Care Intervention with Cardiovascular Disease Risk Management in Rural  
16 Indonesia. *JAMA Cardiol* 2019;**4**:978–86. doi:10.1001/jamacardio.2019.2974  
17  
18 43 Persell SD, Peprah YA, Lipiszko D, *et al.* Effect of Home Blood Pressure Monitoring via a  
19 Smartphone Hypertension Coaching Application or Tracking Application on Adults With  
20 Uncontrolled Hypertension: A Randomized Clinical Trial. *JAMA Netw open* 2020;**3**:e200255.  
21 doi:10.1001/jamanetworkopen.2020.0255  
22  
23  
24  
25  
26  
27  
28  
29  
30  
31  
32  
33  
34  
35  
36  
37  
38  
39  
40  
41  
42  
43  
44  
45  
46  
47  
48  
49  
50  
51  
52  
53  
54  
55  
56  
57  
58  
59  
60

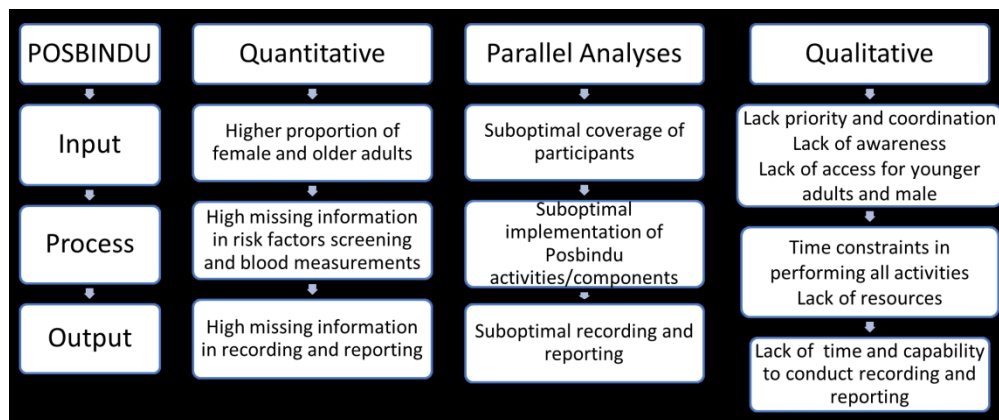

Figure 1. Synthesis of the Quantitative and Qualitative Findings

# BMJ Open

## Missed Opportunities in Hypertension Risk Factors Screening in Indonesia: A Mixed-methods Evaluation of Integrated Health Post (POSBINDU) Implementation

|                                 |                                                                                                                                                                                                                                                                                                                                                                                                                                                                                                                                                                                                    |
|---------------------------------|----------------------------------------------------------------------------------------------------------------------------------------------------------------------------------------------------------------------------------------------------------------------------------------------------------------------------------------------------------------------------------------------------------------------------------------------------------------------------------------------------------------------------------------------------------------------------------------------------|
| Journal:                        | <i>BMJ Open</i>                                                                                                                                                                                                                                                                                                                                                                                                                                                                                                                                                                                    |
| Manuscript ID                   | bmjopen-2021-051315.R1                                                                                                                                                                                                                                                                                                                                                                                                                                                                                                                                                                             |
| Article Type:                   | Original research                                                                                                                                                                                                                                                                                                                                                                                                                                                                                                                                                                                  |
| Date Submitted by the Author:   | 17-Nov-2021                                                                                                                                                                                                                                                                                                                                                                                                                                                                                                                                                                                        |
| Complete List of Authors:       | Widyaningsih, Vitri; Universitas Sebelas Maret, Public Health Febrinasari, Ratih; Universitas Sebelas Maret, Pharmacology Pamungkasari, Eti; Universitas Sebelas Maret, Public Health Mashuri, Yusuf; Universitas Sebelas Maret, Parasitology Sumardiyono, Sumardiyono; Universitas Sebelas Maret, Public Health Balgis, Balgis; Universitas Sebelas Maret, Public Health Koot, Jaap; University Medical Centre Groningen, Department of Health Sciences Landsman-Dijkstra, Jeanet; University Medical Centre Groningen, Department of Health Sciences Probandari, Ari; Universitas Sebelas Maret, |
| <b>Primary Subject Heading</b>: | Public health                                                                                                                                                                                                                                                                                                                                                                                                                                                                                                                                                                                      |
| Secondary Subject Heading:      | Global health                                                                                                                                                                                                                                                                                                                                                                                                                                                                                                                                                                                      |
| Keywords:                       | Hypertension < CARDIOLOGY, International health services < HEALTH SERVICES ADMINISTRATION & MANAGEMENT, PUBLIC HEALTH, Quality in health care < HEALTH SERVICES ADMINISTRATION & MANAGEMENT                                                                                                                                                                                                                                                                                                                                                                                                        |
|                                 |                                                                                                                                                                                                                                                                                                                                                                                                                                                                                                                                                                                                    |

SCHOLARONE™  
Manuscripts

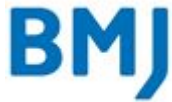

I, the Submitting Author has the right to grant and does grant on behalf of all authors of the Work (as defined in the below author licence), an exclusive licence and/or a non-exclusive licence for contributions from authors who are: i) UK Crown employees; ii) where BMJ has agreed a CC-BY licence shall apply, and/or iii) in accordance with the terms applicable for US Federal Government officers or employees acting as part of their official duties; on a worldwide, perpetual, irrevocable, royalty-free basis to BMJ Publishing Group Ltd ("BMJ") its licensees and where the relevant Journal is co-owned by BMJ to the co-owners of the Journal, to publish the Work in this journal and any other BMJ products and to exploit all rights, as set out in our [licence](#).

The Submitting Author accepts and understands that any supply made under these terms is made by BMJ to the Submitting Author unless you are acting as an employee on behalf of your employer or a postgraduate student of an affiliated institution which is paying any applicable article publishing charge ("APC") for Open Access articles. Where the Submitting Author wishes to make the Work available on an Open Access basis (and intends to pay the relevant APC), the terms of reuse of such Open Access shall be governed by a Creative Commons licence – details of these licences and which [Creative Commons](#) licence will apply to this Work are set out in our licence referred to above.

Other than as permitted in any relevant BMJ Author's Self Archiving Policies, I confirm this Work has not been accepted for publication elsewhere, is not being considered for publication elsewhere and does not duplicate material already published. I confirm all authors consent to publication of this Work and authorise the granting of this licence.

## 1 Missed Opportunities in Hypertension Risk Factors Screening in Indonesia: A Mixed-methods 2 Evaluation of Integrated Health Post (POSBINDU) Implementation

3 Vitri Widyaningsih<sup>1</sup>, Ratih Puspita Febrinasari<sup>1</sup>, Eti Poncorini Pamungkasari<sup>1</sup>, Yusuf Ari Mashuri<sup>1</sup>,  
4 Sumardiyono<sup>1</sup>, Balgis<sup>1</sup>, Jaap Koot<sup>2</sup>, Jeanet Landsman-Dijkstra<sup>2</sup>, Ari Probandari<sup>1</sup> on behalf of Scaling Up Non-  
5 Communicable Disease Intervention in South East Asia (SUNISEA) Project

6 <sup>1</sup>Faculty of Medicine, Universitas Sebelas Maret, Surakarta, Indonesia

7 <sup>2</sup> University of Groningen, University Medical Center Groningen, Department of Health Sciences, The  
8 Netherlands

9 Corresponding author: Prof. dr. Ari Natalia Probandari, MPH., Ph.D. Faculty of Medicine Universitas  
10 Sebelas Maret Surakarta, 57126, Central Java, Indonesia [ari.probandari@staff.uns.ac.id](mailto:ari.probandari@staff.uns.ac.id)

11 Phone: (0271) 646994 **Abstract**

12 **Objectives:** To assess the implementation and contextual barriers of POSBINDU, a community-based  
13 activity focusing on screening of Non-Communicable Diseases (NCDs), mainly hypertension and  
14 diabetes, in Indonesia.

15 **Design:** This was a concurrent mixed-methods study, with a cross-sectional analysis of secondary data  
16 and Focus Group Discussions on stakeholder of POSBINDU.

17 **Setting:** The study was conducted in seven districts in three provinces in Indonesia, with  
18 approximately 50% of the primary health care (PHC) were selected as areas for data collection (n  
19 PHC=100).

20 **Participants:** From 475 POSBINDU sites, we collected secondary data from 54,224 participants. For  
21 the qualitative approach, 21 focus group discussions (FGDs) and 2 in-depth interviews were held  
22 among a total of 223 informants.

23 **Primary outcomes and measures:** Proportion of POSBINDU visitors getting the hypertension  
24 screening and risk factors' assessment, and barriers of POSBINDU implementation.

25 **Results:** Out of the 114,581 POSBINDU visits by 54,224 participants, most (80%) were female and  
26 adults over 50 years old (50%) showing a suboptimal coverage of male and younger adults.  
27 Approximately 95.1% of visitors got their blood pressure measured during their first visit; 353% of  
28 whom had elevated blood pressure. Less than 25% of the visitors reported to be interviewed for NCDs  
29 risk factors during their first visit, less than 80% had anthropometric measurements, and less than 15%  
30 had blood cholesterol examinations. We revealed lack of resources and limited time to perform the  
31 complexities of activities and reporting as main barrier for effective hypertension screening in  
32 Indonesia.

33 **Conclusions:** This study showed missed opportunities in hypertension risk factors screening in  
34 Indonesia. The barriers include a lack of access and implementation barriers (capability, resources,  
35 and protocols).

36 Keywords: Non-communicable diseases, hypertension, screening, community-based program

### 37 **Article Summary**

### 38 **Findings**

1  
2  
3 40 In a mixed-methods study, we found suboptimal implementation of POSBINDU which reflected the  
4 41 missed opportunities in screening for hypertension and its risk factors in Indonesia. Several barriers  
5 42 include suboptimal coverage, complexities of activities and overlap between different NCD-related  
6 43 programs, and lack of resources.

#### 8 9 44 **Implications**

10 45 There is a need to improve coverage and implementation of POSBINDU for screening for hypertension  
11 46 and its risk factors. An integrated approach to improve the implementation of hypertension screening,  
12 47 from guidelines to practice is crucial.

#### 14 48 **Strengths and Limitations of this study**

- 15  
16  
17 49 • This was a relatively large evaluation of POSBINDU in Indonesia, with almost two years of data.  
18 50 • The findings from mixed-methods study provide more comprehensive information on POSBINDU  
19 51 implementation  
20 52 • Information on the contextual factors of POSBINDU implementation can provide insights into  
21 53 steps to improve POSBINDU in the communities .  
22 54 • The use of secondary data poses variations in blood pressure and anthropometrics  
23 55 measurements.  
24 56 • The study limitation also includes the difficulty in differentiating whether the missed reporting  
25 57 was due to lack of activities or lack of reporting. Nevertheless, both the activities and reporting  
26 58 are important in NCDs screening, particularly in the follow up.

#### 29 30 59 **Introduction**

31 60 The increasing trends of Non-Communicable Diseases (NCDs) in the world, including Indonesia,  
32 61 require targeted and specific primary and secondary prevention.[1,2] Hypertension, one of the most  
33 62 common NCDs, has a relatively high (33.4%) prevalence in Indonesia.[3][4] This figure is estimated to  
34 63 increase even further with the changing (more sedentary) lifestyle, unhealthy diet, rising prevalence  
35 64 of obesity, and the increasing life expectancy.[5] In 2015, hypertension attributed to 41% of all  
36 65 disability-adjusted life-years (DALYs) lost, and was the leading risk factor for cardiovascular  
37 66 diseases.[6] Economically, hypertension accounts for \$370 billion in medical costs per year  
38 67 worldwide.[7] Major modifiable risk factors for NCDs include smoking, alcohol consumption,  
39 68 unhealthy diet and obesity, and a sedentary lifestyle.[8,9] With the heavy burden and the economic  
40 69 cost of this disease, primary and secondary prevention for hypertension and its risk factors become  
41 70 very important.

42  
43  
44  
45 71 In 2010, the WHO has recommended the implementation of Package of Essential Interventions for  
46 72 Non-Communicable (PEN) Diseases for low- and middle-income countries.[10] In response, the  
47 73 Ministry of Health (MOH) in Indonesia launched the Integrated Health Post (POSBINDU), as part of the  
48 74 PEN program. POSBINDU, a community-based program for hypertension screening and  
49 75 prevention[11], was added to the several existing NCD-related programs Indonesia. These include  
50 76 Prolanis (Program Pengendalian Penyakit Kronis), a community-based hypertension and diabetes  
51 77 management program affiliated with primary care[12] and Posyandu Lansia, a community-based NCDs  
52 78 screening and management for the elderly.[13] Despite these efforts, the awareness and control of  
53 79 hypertension are still relatively low: only 25% of people with elevated blood pressure are aware of  
54 80 their condition, and only 54% of people diagnosed with hypertension take routine  
55 81 medication.[4,14,15] These conditions are still below the “rule of halves” for hypertension  
56 82 management, which recommends that 50% of hypertension patients be aware of their condition, with  
57 83 half of whom should be treated.[16,17]

1  
2  
3 84 A process evaluation is important in assessing the implementation, to identify barriers, and provide  
4 85 specific recommendations for improvement of POSBINDU. Previous studies have evaluated the  
5 86 effectiveness of the POSBINDU implementation.[11,18] However, they were lacking on the evaluation  
6 87 of contextual barriers in POSBINDU implementation. This study aims to portray the implementation  
7 88 of POSBINDU and its contextual barriers, to provide recommendations for better hypertension and its  
8 89 risk factors screening, and optimal linkage to care in Indonesia.

## 11 90 **Methods**

### 12 91 **Setting**

13 92 POSBINDU is a community-based activity run by community health cadres (volunteers) and supervised  
14 93 by primary health care (PHC) officials. POSBINDU aims to empower communities in screening for NCDs  
15 94 and the risk factors, targeting individuals above 15 years old, particularly those of productive  
16 95 age.[19,20] The main activities include screening for NCDs (mainly hypertension and diabetes) and the  
17 96 risk factors (i.e., smoking, diet, physical activity, obesity). Further, POSBINDU also provides health  
18 97 education and facilitate referral to PHC.[19] For this study, we focus on POSBINDU implementation in  
19 98 screening of hypertension and its risk factor, particularly, since only 30% of hypertensive patients in  
20 99 Indonesia received formal diagnosis.[15]

### 24 100 **Study Design**

25 101 This was a concurrent mixed-methods study in seven districts in three provinces in Indonesia (Central  
26 102 Java, East Java, and North Sumatra). We purposely selected provinces with relatively high prevalence  
27 103 of NCDs based on a national health survey conducted in 2018.[21] Cross-sectional study by obtaining  
28 104 POSBINDU reports were conducted for the quantitative evaluation, whereas case study was  
29 105 conducted to explore barriers of POSBINDU implementation.

### 32 106 **Ethnical approval**

33 107 The study was approved by the ethical review board at Universitas Gadjah Mada, reference number  
34 108 KE/FK/0648/2019. The participants of Focus Group Discussion gave informed consent before  
35 109 participating in this study.

### 38 110 **Data Collection**

39 111 Within every one of the three provinces, we selected two districts: one city representing urban  
40 112 communities, and one district representing rural communities. In Central Java, an additional city was  
41 113 also selected (Figure 1). The rural/urban classification is based on population density and facilities  
42 114 available in the communities. For each district, approximately 50% of the primary health care (PHC)  
43 115 were selected as areas for data collection (n PHC=100). Within the PHC, we collected data for  
44 116 quantitative process evaluation from all active POSBINDU in the areas (n POSBINDU=475). Due to the  
45 117 different number of POSBINDU within each district or PHCs, the number of POSBINDU visitors as well  
46 118 as visits varies by the areas. In most POSBINDU, online/electronic data were not available; Hence, data  
47 119 on participation were manually collected from the POSBINDU register. Data from 2018-2019 were  
48 120 collected, except for Central Java, in which data were available through September 2019.

51 121 For the qualitative approach, 21 focus group discussions (FGDs) and 2 in-depth interviews were held  
52 122 among a total of 223 informants: 22 from Districts Health Department, 101 from Primary Health Care  
53 123 (PHC) facilities and 100 POSBINDU cadres. The two in-depth interviews were conducted with health  
54 124 districts department officials. Within each district, we conducted purposive sampling to recruit health  
55 125 officials responsible for POSBINDU program from the district's health department, and primary health  
56 126 care. We also recruit 2-3 cadres from each PHC based on list of cadres obtained from PHC officials.  
57 127 These participants were recruited to obtain information on POSBINDU implementation facilitators and  
58 128 barriers. The size of the FGDs was on average 10 persons (min 4, max 18). Verbatim transcripts of the

1  
2  
3 129 FGD's were made for qualitative analyses. The FGD facilitators had public health background and  
4 130 experience in conducting qualitative research. All facilitators attended the preparatory meeting to  
5 131 discuss the FGDs and interview guidelines, to obtain similar perception regarding the aims of FGDs  
6 132 and interviews and items of the FGD guidelines.

7  
8  
9 133 Insert Figure 1 here

#### 10 134 Outcome and variables measurements

11 135 Missed opportunities in hypertension screening were quantified by the proportion of POSBINDU  
12 136 visitors getting the risk factors anamnesis, and measurement of anthropometric tests, blood pressure  
13 137 and cholesterol. Analyses was conducted on each indicator to provide more detailed information on  
14 138 specific components of screening which were lacking. Sociodemographic variables which were  
15 139 available on the POSBINDU register, were included in the analyses: sex, age, and level of education.  
16 140 Age was classified into several groups based the Indonesian Ministry of Health classification for age  
17 141 (youth = 15-24 years old, adult = 25-44 years old, pre-elderly = 45-59 years old, and elderly => 60 years  
18 142 old). Occupation was not included in the analyses due to high missing value in the POSBINDU reports  
19 143 (>60%).

20  
21  
22  
23 144 Personal and family history of NCDs were also obtained, which include seven (7) diseases:  
24 145 hypertension, diabetes, heart disease, stroke, asthma, cancer, and high blood cholesterol. Complete  
25 146 personal/family history variables were coded 1 if all information was available and coded 0 if at least  
26 147 one of the disease histories was missing. Any personal/family history variables were coded 1 if at least  
27 148 one of the disease histories was available and coded 0 if all of the history information was missing.

28  
29  
30 149 We also generate variable "incomplete information" which represent whether the individual received  
31 150 the recommended procedure (history taking, anthropometric measurement, blood pressure  
32 151 measurement, and blood examination). The proportion presented in the analyses, described the  
33 152 individuals who did not receive the complete recommended procedure.

34  
35  
36 153 We used the logic model framework for process evaluation to assess the implementation of  
37 154 POSBINDU. We adopted several indicators from the current literature on the use of logic model in  
38 155 process evaluation of community-based health intervention [22–24]. The FGDs theme as well as  
39 156 indicators of the secondary data developed based on the literature, were discussed with officials from  
40 157 health department and PHC officials in one pilot site for finalization. We further explored the barriers  
41 158 of POSBINDU implementation using a qualitative approach.

#### 42 159 Analyses

43  
44 160 Statistical analyses were conducted using STATA, to calculate the proportion of activities and  
45 161 outcomes. We further conduct Chi-square, T-test, and ANOVA to assess the statistical significance of  
46 162 the differences. Analyses were conducted on missing information, reflecting whether specific  
47 163 procedure in POSBINDU were carried out and reported. Further analyses on proportion of  
48 164 hypertension and BMI status were also conducted. The two indicators were reported due to relatively  
49 165 high availability of these data (92% and 76%) compared to other indicators. Verbatim transcript from  
50 166 FGDs and in-depth interviews recordings were analyzed. Content analysis was applied for the  
51 167 qualitative data to ascertain barriers for the POSBINDU implementation in Indonesia by two  
52 168 independent researchers. To enhance trustworthiness, we assess barriers of POSBINDU from several  
53 169 sources for triangulation purposes: health and PHC officials to reflect implementer's perspective, and  
54 170 cadres to reflect implementers and users' perspective. During data analyses, we also discuss the  
55 171 findings with representative of the FGD participants, i.e., member checking. Parallel analyses were  
56 172 conducted to synthesize the findings from the quantitative and qualitative approaches. Weaving



173 technique, analyzing the quantitative and qualitative findings together by theme or concept, was used  
174 to integrate the findings.[25]

### 175 Patients and public involvement

176 Patients or the public were not directly involved in the design, or conduct, or reporting, or  
177 dissemination plans of our research.

## 178 Results

### 179 Participation of community for hypertension screening in POSBINDU

180 Data from 114,581 POSBINDU visits (54,224 participants) were analyzed. The findings showed similar  
181 patterns in the districts and provinces: more female and elderly participants. Approximately 80% were  
182 female participants, with the highest proportion of female participants in rural North Sumatra (95.5%).  
183 Meanwhile, in Java, a higher proportion of female participants were observed in urban areas (Table  
184 1).

185 Table 1. Characteristics of POSBINDU Participants within the Three Provinces in Indonesia  
186 (POSBINDU Register, 2018-2019)

| Characteristics                  | North Sumatra |            | East Java  |            | Central Java |            | Total      |
|----------------------------------|---------------|------------|------------|------------|--------------|------------|------------|
|                                  | Rural         | Urban      | Rural      | Urban      | Rural        | Urban      |            |
| Number of individuals            | 5,103         | 10,999     | 23,053     | 4,983      | 3,398        | 6,688      | 54,224     |
| Number of PHC                    | 11            | 23         | 29         | 9          | 11           | 17         | 100        |
| Number of POSBINDU               | 38            | 38         | 283        | 27         | 27           | 62         | 475        |
| <b>Categorical (%<br/>SE)</b>    |               |            |            |            |              |            |            |
| Female                           | 95.5 (0.3)    | 71.3 (0.4) | 76.2 (0.3) | 86.7 (0.5) | 73.7 (0.8)   | 88.2 (0.4) | 79.4 (0.2) |
| Age                              |               |            |            |            |              |            |            |
| 15-24                            | 8.7 (0.4)     | 6.1 (0.3)  | 6.2 (0.2)  | 7.8 (0.4)  | 13.3 (0.7)   | 3.8 (0.3)  | 6.7 (0.1)  |
| 25-44                            | 38.1 (0.8)    | 24.9 (0.5) | 33.0 (0.3) | 48.7 (0.8) | 47.7 (1.0)   | 28.9 (0.7) | 22.2 (0.2) |
| 45-59                            | 30.7 (0.7)    | 37.6 (0.6) | 33.2 (0.3) | 31.0 (0.6) | 30.1 (0.9)   | 42.4 (0.7) | 24.8 (0.2) |
| >60                              | 22.4 (0.6)    | 31.3 (0.6) | 27.6 (0.3) | 12.5 (0.5) | 8.9 (0.6)    | 24.9 (0.6) | 24.7 (0.2) |
| Education**                      |               |            |            |            |              |            |            |
| PS                               | 2.6 (0.2)     | 15.3 (0.3) | 57.3 (0.3) | 50.5 (0.7) | 41.1 (0.8)   | 25.2 (0.5) | 38.0 (0.2) |
| HS                               | 0.3 (0.07)    | 0.7 (0.1)  | 0.3 (0.0)  | 1.3 (0.2)  | 2.3 (0.3)    | 1.8 (0.2)  | 0.8 (0.0)  |
| Univ                             | 0.0 (0.0)     | 2.7 (0.2)  | 0.4 (0.04) | 4.9 (0.3)  | 4.9 (0.4)    | 2.1 (0.2)  | 1.8 (0.1)  |
| Missing                          | 97.1 (0.2)    | 81.4 (0.4) | 41.9 (0.3) | 43.3 (0.7) | 51.8 (0.9)   | 70.8 (0.6) | 59.4 (0.2) |
| Number of visits                 |               |            |            |            |              |            |            |
| 1 time                           | 87.0 (0.4)    | 77.4 (0.3) | 68.4 (0.3) | 65.6 (0.7) | 84.5 (0.6)   | 56.4 (0.6) | 71.2 (0.1) |
| 2-6 times                        | 12.9 (0.5)    | 21.7 (0.3) | 21.1 (0.2) | 23.9 (0.6) | 13.3 (0.6)   | 35.1 (0.6) | 22.0 (0.1) |
| 7-12 times                       | 0.1 (0.0)     | 0.6 (0.1)  | 6.3 (0.2)  | 6.0 (0.3)  | 2.1 (0.2)    | 5.9 (0.3)  | 5.3 (0.1)  |
| >12 times                        | 0 (0.0)       | 0.2 (0.1)  | 4.1 (0.1)  | 4.5 (0.3)  | 0.1 (0.0)    | 2.6 (0.2)  | 1.4 (0.1)  |
| <b>Continuous<br/>(mean, SE)</b> |               |            |            |            |              |            |            |
| Age                              | 46.4 (0.2)    | 51.7 (0.2) | 49.7 (0.1) | 43.4 (0.2) | 41.0 (0.3)   | 50.4 (0.2) | 48.6 (0.8) |
| Number of visits                 | 1.2 (0.8)     | 1.4 (0.1)  | 2.5 (0.2)  | 2.7 (0.5)  | 1.4 (0.2)    | 2.5 (0.3)  | 2.1 (0.1)  |

187 Notes:

188 Within province, rural-urban comparisons are significant at 0.05

189 Between provinces comparisons are significant at 0.05  
 190 Differences in proportion tested using Chi squares  
 191 SE= standard error  
 192 \*\*Education = HS (High school) PS (Primary school/less) Univ (University/college), Missing = data  
 193 missing

195 Despite the relatively high missing information on age (n missing= 12,084, or 22.3%), we found that  
 196 the participants were on average of older age, with roughly 50% of participants aged over 50 years  
 197 old (Table 1). The highest proportion of participants >60 years old were observed in rural East Java  
 198 (31.3%), with mean age of 51.7 years old. We measured the youngest POSBINDU participants in rural  
 199 Central Java (mean age 41.0 years old). Meanwhile, the missing information on education level were  
 200 higher (almost 60%), with even higher proportion in North Sumatra.

201 In the span of the two years of secondary data collection, we found that, on average, the participants  
 202 visit POSBINDU twice, with the lowest average of visits in North Sumatra (rounded to 1  
 203 visit/participant). Approximately 38,628 (71.2%) of participants visit POSBINDU once for two years,  
 204 and 761 (1.4%) visits POSBINDU more than 12 times.

205 Table 2. Missed Opportunity in Hypertension Screening and Risk Factors Characteristics within  
 206 POSBINDU Participants (POSBINDU Register, 2018-2019)

| Characteristics                            | North Sumatra  |                | East Java      |                | Central Java   |                | Total<br>%(SE) |
|--------------------------------------------|----------------|----------------|----------------|----------------|----------------|----------------|----------------|
|                                            | Rural<br>%(SE) | Urban<br>%(SE) | Rural<br>%(SE) | Urban<br>%(SE) | Rural<br>%(SE) | Urban<br>%(SE) |                |
| <b>Missing Information in All Visits</b>   |                |                |                |                |                |                |                |
| n                                          | 6,061          | 15,774         | 57,504         | 13,422         | 4,925          | 16,895         | 114,581        |
| Personal history (complete)                | 99.3 (0.1)     | 92.6 (0.2)     | 67.9 (0.2)     | 42.5 (0.4)     | 62.1 (0.7)     | 95.2 (0.2)     | 73.8 (0.1)     |
| Family history (complete)                  | 99.4 (0.1)     | 92.6 (0.2)     | 65.1 (0.2)     | 39.7 (0.4)     | 61.6 (0.7)     | 95.9 (0.2)     | 72.1 (0.1)     |
| Personal history (any)                     | 88.2 (0.4)     | 88.5 (0.3)     | 56.4 (0.2)     | 17.2 (0.3)     | 54.2 (0.7)     | 91.0 (0.2)     | 62.9 (0.1)     |
| Family history (any)                       | 97.5 (0.2)     | 88.9 (0.3)     | 57.3 (0.2)     | 28.9 (0.4)     | 53.5 (0.7)     | 93.8 (0.2)     | 65.7 (0.1)     |
| Height                                     | 42.7 (0.6)     | 19.0 (0.2)     | 15.6 (0.2)     | 20.7 (0.3)     | 30.6 (0.7)     | 23.3 (0.3)     | 19.9 (0.1)     |
| Weight measurement                         | 35.8 (0.6)     | 16.0 (0.2)     | 18.8 (0.2)     | 5.6 (0.2)      | 8.9 (0.4)      | 12.3 (0.3)     | 16.4 (0.1)     |
| Waist circumference                        | 49.5 (0.6)     | 36.0 (0.3)     | 15.6 (0.2)     | 12.7 (0.2)     | 36.9 (0.6)     | 63.6 (0.4)     | 27.8 (0.1)     |
| Blood pressure                             | 1.8 (0.2)      | 5.8 (0.2)      | 9.8 (0.1)      | 4.6 (0.2)      | 4.2 (0.3)      | 6.3 (0.2)      | 7.4 (0.1)      |
| Blood cholesterol                          | 87.0 (0.4)     | 80.1 (0.3)     | 81.9 (0.2)     | 97.4 (0.1)     | 91.1 (0.4)     | 82.0 (0.3)     | 84.2 (0.1)     |
| Incomplete information                     | 99.6 (0.1)     | 95.1 (0.2)     | 98.1 (0.1)     | 99.6 (0.1)     | 99.6 (0.1)     | 99.6 (0.1)     | 98.2 (0.1)     |
| <b>Missing Information in First Visits</b> |                |                |                |                |                |                |                |
| n                                          | 5,103          | 10,999         | 23,053         | 4,983          | 2,298          | 6,688          | 54,224         |
| Personal history (complete)                | 99.2 (0.1)     | 89.9 (0.3)     | 72.8 (0.3)     | 35.1 (0.7)     | 49.3 (0.9)     | 92.6 (0.3)     | 76.3 (0.2)     |
| Family history (complete)                  | 99.3 (0.1)     | 89.8 (0.3)     | 71.3 (0.3)     | 41.4 (0.7)     | 50.9 (0.9)     | 93.5 (0.3)     | 76.4 (0.2)     |
| Personal history (any)                     | 88.2 (0.5)     | 85.1 (0.3)     | 58.3 (0.3)     | 15.3 (0.5)     | 40.1 (0.8)     | 86.9 (0.4)     | 68.3 (0.2)     |
| Family history (any)                       | 97.3 (0.2)     | 85.2 (0.3)     | 60.6 (0.3)     | 30.0 (0.6)     | 40.1 (0.8)     | 90.5 (0.4)     | 65.0 (0.2)     |
| Height                                     | 41.8 (0.7)     | 19.0 (0.4)     | 14.8 (0.2)     | 21.1 (0.6)     | 20.4 (0.7)     | 23.0 (0.5)     | 20.1 (0.2)     |

|                                               |            |            |            |            |            |            |             |
|-----------------------------------------------|------------|------------|------------|------------|------------|------------|-------------|
| Weight                                        | 35.3 (0.3) | 15.0 (0.3) | 16.7 (0.2) | 47.6 (0.3) | 7.2 (0.4)  | 12.9 (0.4) | 15.9 (0.1)  |
| Waist circumference                           | 48.9 (0.7) | 33.6 (0.4) | 11.1 (0.2) | 12.9 (0.5) | 23.0 (0.7) | 66.1 (0.6) | 26.9 (0.2)  |
| Blood pressure                                | 1.7 (0.2)  | 5.4 (0.2)  | 4.9 (0.1)  | 5.0 (0.3)  | 3.2 (0.3)  | 7.0 (0.3)  | 4.9 (0.1)   |
| Blood cholesterol                             | 86.1 (0.5) | 75.7 (0.4) | 76.6 (0.3) | 97.9 (0.2) | 92.3 (0.4) | 79.1 (0.5) | 80.6 (0.2)  |
| Incomplete information                        | 99.6 (0.1) | 93.0 (0.2) | 96.7 (0.1) | 99.7 (0.1) | 99.4 (0.1) | 99.4 (0.1) | 97.01 (0.1) |
| <b>Risk Factors Screening in All Visits</b>   |            |            |            |            |            |            |             |
| n                                             | 3,423      | 12,015     | 45,108     | 10,484     | 3,374      | 12,750     | 87,154      |
| <b>BMI</b>                                    |            |            |            |            |            |            |             |
| Normal                                        | 48.3 (0.9) | 48.2 (0.5) | 51.3 (0.2) | 44.6 (0.5) | 52.3 (0.9) | 46.4 (0.4) | 49.3 (0.2)  |
| Underweight                                   | 4.9 (0.4)  | 4.5 (0.2)  | 8.0 (0.1)  | 4.5 (0.2)  | 9.1 (0.5)  | 3.8 (0.2)  | 6.3 (0.1)   |
| Overweight                                    | 31.9 (0.8) | 34.4 (0.4) | 30.8 (0.2) | 34.7 (0.4) | 29.1 (0.8) | 34.2 (0.4) | 32.3 (0.2)  |
| Obese                                         | 14.9 (0.6) | 12.9 (0.3) | 10.0 (0.3) | 16.3 (0.4) | 9.4 (0.5)  | 15.7 (0.3) | 12.1 (0.1)  |
| n                                             | 5,942      | 14,835     | 51,784     | 12,773     | 4,717      | 15,814     | 105,865     |
| Hypertension                                  | 35.4 (0.6) | 28.0 (0.4) | 42.5 (0.2) | 33.7 (0.4) | 25.6 (0.6) | 35.9 (0.4) | 37.2 (0.1)  |
| <b>Risk Factors Screening in First Visits</b> |            |            |            |            |            |            |             |
| n                                             | 2,925      | 8,440      | 18,820     | 3,850      | 2,678      | 5,078      | 41,791      |
| <b>BMI</b>                                    |            |            |            |            |            |            |             |
| Normal                                        | 49.3 (0.9) | 48.0 (0.5) | 51.5 (0.4) | 45.3 (0.8) | 52.4 (1.0) | 44.4 (0.7) | 49.3 (0.2)  |
| Underweight                                   | 4.8 (0.4)  | 4.5 (0.2)  | 7.7 (0.2)  | 5.1 (0.4)  | 10.1 (0.6) | 4.2 (0.3)  | 6.3 (0.1)   |
| Overweight                                    | 32.0 (0.9) | 34.2 (0.5) | 30.4 (0.3) | 33.3 (0.8) | 28.7 (0.9) | 35.1 (0.7) | 32.0 (0.2)  |
| Obese                                         | 13.9 (0.6) | 13.3 (0.4) | 10.4 (0.2) | 16.3 (0.6) | 8.8 (0.5)  | 16.3 (0.5) | 12.4 (0.2)  |
| n                                             | 5,008      | 10,379     | 21,858     | 4,725      | 3,288      | 6,201      | 51,459      |
| Hypertension                                  | 34.5 (0.7) | 28.5 (0.4) | 40.5 (0.3) | 31.6 (0.7) | 25.1 (0.8) | 37.9 (0.6) | 35.3 (0.2)  |

## 207 Notes:

208 Within province, rural-urban comparisons are significant at 0.05

209 Between provinces comparisons are significant at 0.05

210 Differences in proportion tested using Chi squares

211 SE= standard error

212

213 We further observed the relatively high missing information for hypertension screening across the  
 214 districts, with the following general pattern. First, a relatively high proportion of missing information  
 215 concerning the personal and family history, with East Java having the lowest proportion. Second, a  
 216 relatively lower proportion of missing data on anthropometric measurements (less than 50%). Third,  
 217 we found the highest proportion of available data for blood pressure measurements in all the seven  
 218 districts. Last, our analysis identified higher missing values for blood cholesterol measurements  
 219 (84,2%). For all measurements, there were significant differences between the three provinces, as  
 220 well as between the rural and urban areas within the provinces (Table 2).

221 Based on available data, we found that obesity seems to be more prevalent in urban areas in Java, but  
 222 relatively similar in North Sumatra. In contrast, hypertension was more prevalent in a rural area for  
 223 East Java and North Sumatra but was more common in urban districts of Central Java (Table 2).  
 224 However, these data should be interpreted cautiously due to the relatively high missing data on the  
 225 measurements.

226 **Barriers for the screening of hypertension in POSBINDU**

227 The qualitative data supported the quantitative finding about lacking participation of male and  
 228 younger population to POSBINDU. In the FGDs, cadres and health officials stated the barriers for male  
 229 and younger participants to attend POSBINDU, including the inconvenience of POSBINDU schedule, as  
 230 well as low awareness for hypertension screening (Table 3).

231 Table 3. Qualitative analyses of Focus Group Discussion amongst POSBINDU Cadres, Primary Health  
 232 Care and Health Department Officials

| Themes                                                      | Category                                                                               | Codes                                                                            |
|-------------------------------------------------------------|----------------------------------------------------------------------------------------|----------------------------------------------------------------------------------|
| Suboptimal target population and gap in policy              | Participants' characteristics                                                          | Younger adults rarely participate                                                |
|                                                             |                                                                                        | Lack of male participants                                                        |
|                                                             | Barrier to participations                                                              | Schedule incompatibility                                                         |
|                                                             |                                                                                        | Low awareness for screening                                                      |
|                                                             |                                                                                        | Lack of role model for screening                                                 |
|                                                             | Ineffective policy and coordination                                                    | Lack of prioritization for NCD                                                   |
|                                                             |                                                                                        | Implementation gap of national policy/program at the local level                 |
|                                                             |                                                                                        | The need for coordination with different stakeholders                            |
|                                                             |                                                                                        | The need for coordination among NCD-related programs                             |
|                                                             | Lack of human resources in terms of capability and quantity for hypertension screening | Cadres have multiple tasks, with time constraints                                |
| Cadres are volunteers with other obligations                |                                                                                        |                                                                                  |
| Cadres' competencies                                        |                                                                                        | Lack of knowledge on hypertension and other NCD                                  |
|                                                             |                                                                                        | Lack of ability to conduct measurements and provide health education             |
|                                                             |                                                                                        | Lack of ability to conduct recording and reporting                               |
| Lack of NCD program officers for supervision and reporting  |                                                                                        | Lack of NCD program officers at PHC                                              |
|                                                             |                                                                                        | Most program officers are responsible for multiple tasks/programs                |
|                                                             |                                                                                        | Lack of reporting officers                                                       |
| Provision of Referral Counselling                           |                                                                                        | The participant with hypertension is not always referred to PHC                  |
|                                                             |                                                                                        | Lack of counseling to participants before the referral made                      |
|                                                             |                                                                                        | POSBINDU has referral form, but rarely used                                      |
|                                                             |                                                                                        | Treatment for the referral is covered by their health insurance                  |
| Lack of resources for hypertension screening and prevention |                                                                                        | Equipment for hypertension screening                                             |
|                                                             | Equipment maintenance is inadequate                                                    |                                                                                  |
|                                                             | Limited logistics for cholesterol measurement                                          |                                                                                  |
|                                                             | Lack of budget                                                                         | POSBINDU is funded by the government, stakeholder (private sectors) or community |
|                                                             |                                                                                        | Lack of budget for POSBINDU activities                                           |

|                                                           |                                                  |                                                       |
|-----------------------------------------------------------|--------------------------------------------------|-------------------------------------------------------|
|                                                           |                                                  | Lack of budget for cadres training and incentives     |
|                                                           | Health education material                        | Lack of health education materials                    |
|                                                           | Infrastructure for recording and reporting       | Not all cadres have laptops                           |
|                                                           |                                                  | Limited internet connection in some areas             |
|                                                           |                                                  | Most POSBINDU stations use manual reporting           |
| Time constraints for implementation based on MOH standard | The complexity of activities and time limitation | The time required for examination is too long         |
|                                                           |                                                  | Too many information needs to be asked and filled out |
|                                                           |                                                  | The referral form is rarely used                      |
|                                                           | The complexity of reporting forms                | Many forms need to be filled, while time is limited   |
|                                                           |                                                  | A simplified form in checklist format is preferred    |

233

234 The need for role model from community leader to improve participation and the barrier for  
235 participation, particularly among males is highlighted by these quotes:

236 *“ Yes, we don’t have a lot of men (participants), because they are working “ (Cadre, FGD#21)*

237 *“ In our POSBINDU, the awareness for early screening is still low. Only several people come (to  
238 POSBINDU), younger people don’t want to come because (POSBINDU is conducted) during  
239 working days “ (Cadre, FGD#3)*

240 *“ ...Socialization for this (POSBINDU) is needed, often, the community leader in our area don’t  
241 want to participate because they are afraid to be screened” (Cadre, FGD#2)*

242 *“.. when I asked the communities, why they did not come to POSBINDU, or why there were only  
243 few people, they said because I (the community member) were not sick, so why do I need to get  
244 (health) check-up (?). So, they were not aware that POSBINDU is not only for those who are sick”  
245 (Health official, FGD#19)*

246 *“ I asked POSBINDU (participant), why elderly? Where are the younger population? And they  
247 said that the young stayed at home because they were embarrassed if they have diseases.. “  
248 (Health official, FGD#16)*

249 Lack of priority and overlap of NCD-related programs also contribute to a suboptimal target population  
250 of POSBINDU, as illustrated by the following quote:

251 *“ (NCD) is not a priority program, hence, there’s a lack of commitment between the superior  
252 (health department) with the program officials, for example.” (Health official, FGD#7)*

253 *“...(different department in) the Ministry of Health focus on specific diseases, such as diabetes  
254 and cancer... However, in the community, (the programs) become general. (We) run Polindes,  
255 (Posyandu) Lansia, POSBINDU, School Health Program. In my opinion, the regulation is rigid  
256 and detailed, but the implementation is mixed (overlap). If we want to give optimum results,  
257 it takes efforts.” (Health official, FGD#10).*

258 Several barriers for implementation were revealed. The cadres and health officers often have to run  
259 several different programs. The FGDs also revealed a lack of capability of cadres to conduct  
260 measurements for hypertension screening, providing health education, and also conducting the  
261 recording and reporting of the POSBINDU activities and measurements. The informants also

262 mentioned a lack of resources, including budget, equipment, and logistics to conduct all the  
263 measurements.

264 *“ One person can hold 5 positions in PHC activities... POSBINDU cadres, Posyandu Lansia cadres,*  
265 *and other programs.. “ (Cadre, FGD#11)*

266 *“ (cadres of) Posbindu do not have laptop nor cell phone for the reporting application (of*  
267 *POSBINDU), hence, we report to PHC manually” (Cadre, FGD#14)*

268 The barriers also include the complexities of the activities and measurements, as well as extensive  
269 reporting forms, which require a long time to be completed.

270 *“ ...it takes a long time, because of the measurements and stages (of POSBINDU activities) “ (PHC*  
271 *officer, FGD#8)*

272 *“ ...POSBINDU report is too time-consuming, because it is long (detail), including identity, cell*  
273 *phone number, address, and others... and it has to be filled out every month.” (PHC officer,*  
274 *FGD#6)*

275 Interestingly, in several districts, we found the implementation of mobile POSBINDU, moving from  
276 one community to the other within the same subdistricts.

277 *“Our POSBINDU is mobile, we have ten communities, so every week, we move from one*  
278 *community to the next, focusing on people 15-59 years old.” (Cadre, FGD#18)*

279 We further synthesized the quantitative and qualitative results. We categorized the barriers into three  
280 main parts: 1) input, reflecting the target population/coverage of POSBINDU, 2) process, describing  
281 the implementation of POSBINDU activities, and 3) output, reflecting the recording and reporting  
282 process of POSBINDU (Figure 2). Results show that in both approaches we found lacking participation  
283 of male and younger people in POSBINDU. Lack of priority for NCD screening and ineffective  
284 coordination among stakeholders, combined with lack of awareness and access might attribute to this  
285 finding. The high missed opportunity, particularly in history taking and measurements, were likely due  
286 to the complexity of the activities/measurements, as well as lack of resources. The high missing data  
287 also stem from the complexity of the forms and lack of capability for online reporting.

288 Insert Figure 2 here

## 289 Discussion

290 In this study, we revealed missed opportunities in input, activities, and output of POSBINDU  
291 implementation in screening for hypertension and its risk factors. Several contextual barriers were  
292 identified. The suboptimal coverage was possibly due to lack of priority for NCD screening, lack of  
293 awareness and access, and overlap of NCD-related program. The suboptimal activities and reporting  
294 were likely caused by a lack of resources, as well as limited time to perform the complexities of  
295 activities and reporting according to MOH guideline.

296 The missed opportunity to screen male and younger population that we found in this study is  
297 particularly concerning. Although the prevalence is lower than of the older population, hypertension  
298 prevalence among young Indonesian is still relatively high (28%).[26] While the target population of  
299 POSBINDU is listed as those 15 years or older, the elderly are usually targeted in Posyandu Lansia, a  
300 community-based screening and management for the elderly population.[27] Awareness is also lower  
301 in male and younger adults, signaling the need to screen this population.[3] Ideally, POSBINDU  
302 becomes the “gatekeeper” for screening in the community. Hypertensive and diabetic patients were

1  
2  
3 303 then referred to PHC and joined Prolanis, a community-based activity funded by the health insurance  
4 304 program, for management of chronic diseases patients.[12]

6 305 Furthermore, with a lack of male participation, POSBINDU is missing one of the key target populations  
7 306 for risk factors screening: smokers. Analysis of a national survey in 2014 reported 32% prevalence of  
8 307 smoking, with approximately 40% of males aged 15-55 years old and 14% of male adolescents are  
9 308 current smokers.[28–30] Further, 20% of Indonesia's total chronic diseases are attributed to smoking,  
11 309 with hypertension as the highest proportion.[31] Screening for hypertension and its risk factors  
12 310 earlier, combined with lifestyle-based interventions effectively avoid future complications.[32,33]

14 311 We also revealed the need to prioritize and reorganize the current NCD-related programs, to address  
15 312 the suboptimal coverage and the overlap. An example of the gap between the national  
16 313 recommendation and local implementation is reflected in the coordination of existing NCD-related  
17 314 programs: POSBINDU, Posyandu Lansia, and PANDU PTM. In the MOH, the PANDU PTM (Pelayanan  
19 315 Terpadu Penyakit Tidak Menular, Integrated Health Services for NCDs) and POSBINDU are regulated  
20 316 under the Directorate for Disease Management, while Posyandu Lansia is under the Directorate of  
21 317 Public Health. Despite the different directorates, the implementation at community level is often  
22 318 conducted simultaneously and often overlap. Reporting, however, is conducted separately. Hence, as  
23 319 previous studies have noted, we also recommend the need of comprehensive and coordinated NCDs  
24 320 prevention program in Indonesia.[34–36]

27 321 The relatively high missed opportunity in screening for hypertension risk factors, as well as  
28 322 sociodemographic characteristics found in this study, portrays suboptimal implementation of  
29 323 POSBINDU. This can be caused by a lack of recording and reporting (monitoring and evaluation fidelity)  
30 324 or lack of measurement (implementation fidelity). In our further elaboration during the FGDs, we  
31 325 found that lack of human resources might contribute to the suboptimal implementation of POSBINDU.  
32 326 Our findings revealed the need to train cadres to improve their skills and efficiency in conducting the  
33 327 measurements and history taking, as well as reporting the measurements. This is in line with findings  
34 328 from Meinema et al (2017 and Abdell-All et al (2018)[37,38]. Our findings also imply the complexities  
35 329 of the activities and reporting of POSBINDU which lead to ineffective implementation. It is important  
36 330 to ensure that valuable screening information can be recorded and followed up, for better  
37 331 intervention. A simplified screening program with integrated reporting is needed.

41 332 In this study, we also discovered lack of financial resources and equipment as barriers to POSBINDU  
42 333 implementation. The integration of POSBINDU and PANDU PTM to the national health insurance  
43 334 scheme might be important to ensure the sustainability of funding for the program. Integration of  
44 335 POSBINDU into the national health insurance can also improve participation of the working  
45 336 population, most of whom are covered by the national health insurance.[39] Previous studies have  
46 337 reported an increase in uptake of service by health insurance membership.[40–42]

48 338 Based on our findings, we identified two main areas that needs to be improved: coverage and  
49 339 implementation of POSBINDU. To improve coverage of POSBINDU, there are two important steps that  
50 340 we recommend. First, an integrated approach with collaboration amongst different programs and  
51 341 directorates to reduce the overlap and simplify the POSBINDU implementation at the PHC and  
52 342 community level. PANDU PTM as the adaptation of WHO PEN,[43] needs to be implemented in a  
53 343 wider scale. Second, redirecting the target population of hypertension screening, to cover also  
54 344 younger and male population. A workplace-based screening program which can address the barriers  
55 345 identified in the qualitative findings is recommended.[44,45] For this younger population, the use of  
56 346 mobile technology for monitoring of risk factors and measurement might be effective. Previous

1  
2  
3 347 studies have reported the effectiveness of mobile health for hypertension screening and risk  
4 348 stratification.[46,47]  
5

6 349 To improve the implementation and components of POSBINDU activities, a simplified algorithm to  
7 350 screen and refer the target population is needed. The algorithm needs to be developed both in the  
8 351 electronic format and manual format to address the different capabilities of community cadres and  
9 352 resources in the community. Simplifying the program and reporting systems will also reduce the  
10 353 workload of PHC and district health officials. Further, a clear algorithm for the referral of “screened”  
11 354 cases to PHC is important. The readiness of the PHCs also needs to be improved to adequately manage  
12 355 the potential surge in referred cases. Lastly, there is a need to integrate hypertension and CVD  
13 356 screening program into the national health insurance system. Hence, ensuring the sustainability of  
14 357 funding and resources of the program. With these approaches, comprehensive screening for  
15 358 hypertension and CVD along the continuum of care might be more effective.  
16  
17  
18

19 359 This study has several limitations. First, the proportion of our measures are not reflective for the whole  
20 360 target population of POSBINDU, since the participants were mostly female and of older age. The  
21 361 characteristics of our sample, which are generally older with a higher proportion of females, drive the  
22 362 proportion higher than that of the general population in Indonesia. However, this study reflects the  
23 363 current participants of POSBINDU. Second, we used a secondary data collection by POSBINDU cadres,  
24 364 the high number of missing data that we presented in this study, probably stem from two main  
25 365 sources: omissions in reporting or a true lack in measurement/activities. Nevertheless, both the  
26 366 activities and reporting are important in NCDs screening, particularly in the follow-up. The secondary  
27 367 data also prone to measurement bias, particularly, with the variations in POSBINDU measurements by  
28 368 cadres. The Ministry of Health provided guidelines in the measurement for hypertension in POSBINDU,  
29 369 however, the implementation might vary. The high missing information on several sociodemographic  
30 370 characteristics i.e., occupation and education, also limit our ability to conduct multivariable analyses.  
31 371 Another limitation of this study is we have not included the perspective of POSBINDU participants in  
32 372 the FGDs. Instead, we considered the POSBINDU cadres to represents the voice of both the  
33 373 implementers as well as users. However, we include the perspective of the POSBINDU participants in  
34 374 the baseline of our prospective data collection (ongoing).  
35  
36  
37  
38

39 375 Despite the limitation, there are several strengths of the study: First, to our knowledge, this was the  
40 376 first relatively large evaluation of POSBINDU. Second, the use of a mixed-methods study design, and  
41 377 therefore, providing more comprehensive information on POSBINDU implementation. Third, the  
42 378 study also investigates the contextual factors that should be addressed in the improvement of the  
43 379 community-based hypertension screening program in Indonesia. This study might provide insights into  
44 380 POSBINDU implementation in other areas in Indonesia, and can be the basis for further  
45 381 recommendation to improve POSBINDU implementation.  
46  
47

## 48 382 **Conclusion**

49 383 This study showed the suboptimal implementation of POSBINDU activities. Particularly, the missed  
50 384 opportunity in screening for hypertension risk factors in Indonesia. The barriers include a lack priority  
51 385 for NCDs, lack of awareness and access for subpopulation, and several implementation barriers:  
52 386 capability, resources, and protocols. An innovative approach to simplify and improve the capacity of  
53 387 POSBINDU is in preparation to optimize the screening and linkage to hypertension care in Indonesia.  
54 388 This study provides evidence-based recommendations in improving the current implementation of  
55 389 POSBINDU, in the Indonesian context.  
56  
57  
58  
59  
60



### 390 **Data Statement**

391 The de-identified data from this study is available upon request to the corresponding or first author  
392 pending thorough review of request and adherence to the Indonesian government regulation on  
393 data sharing.

### 394 **Author Contributions**

395 VW, AP, RFP, EP, YM, JK and JLD contributed in the design of the study. VW, A, RFP, EP, YM, B, and M  
396 participate actively in study implementation, including in data collection. VW, YM, S, and RFP analyzed  
397 the quantitative data. AP, EP, and B analyzed the qualitative data. VW, AP, RFP, S, and YM draft the  
398 manuscript with all co-authors revised critically. All authors read and approved the final manuscript.

### 399 **Funding**

400 This work was supported by the Horizon 2020 research program of the European Union. This study  
401 was co-financed by the Horizon 2020 research program of the European Union, under grant 825026  
402 Scaling Up NCDs interventions in South East Asia.

### 403 **Conflict of Interest**

404 None declared

### 405 **License**

406 The Corresponding Author has the right to grant on behalf of all authors and does grant on behalf of  
407 all authors, an exclusive licence (or non exclusive for government employees) on a worldwide basis  
408 to the BMJ Publishing Group Ltd ("BMJ"), and its Licensees to permit this article (if accepted) to be  
409 published in The BMJ's editions and any other BMJ products and to exploit all subsidiary rights, as  
410 set out in our licence.

### 411 **Acknowledgment**

412

413 Figure 1. Study Sample Selection

414 Figure 2. Synthesis of the Quantitative and Qualitative Findings

### 415 **References**

- 416 1 Basu S, Millett C. Social epidemiology of hypertension in middle-income countries:  
417 Determinants of prevalence, diagnosis, treatment, and control in the WHO SAGE study.  
418 *Hypertension* 2013;**62**:18–26. doi:10.1161/HYPERTENSIONAHA.113.01374
- 419 2 Mills KT, Bundy JD, Kelly TN, *et al.* Global disparities of hypertension prevalence and control.  
420 *Circulation* 2016;**134**:441–50. doi:10.1161/CIRCULATIONAHA.115.018912
- 421 3 Hussain MA, Al Mamun A, Reid C, *et al.* Prevalence, awareness, treatment and control of  
422 hypertension in Indonesian adults aged  $\geq 40$  years: Findings from the Indonesia Family Life  
423 Survey (IFLS). *PLoS One* 2016;**11**:1–16. doi:10.1371/journal.pone.0160922
- 424 4 Peltzer K, Pengpid S. The Prevalence and Social Determinants of Hypertension among Adults  
425 in Indonesia: A Cross-Sectional Population-Based National Survey. *Int J Hypertens* 2018;**2018**.  
426 doi:10.1155/2018/5610725
- 427 5 Purnamasari D. The Emergence of Non-communicable Disease in Indonesia. *Acta Med*  
428 *Indones* 2018;**50**:273–4. <http://www.ncbi.nlm.nih.gov/pubmed/30630990>
- 429 6 Vos T, Abajobir AA, Abbafati C, *et al.* Global, regional, and national incidence, prevalence, and

- 1  
2  
3 430 years lived with disability for 328 diseases and injuries for 195 countries, 1990-2016: A  
4 431 systematic analysis for the Global Burden of Disease Study 2016. *Lancet* 2017;**390**:1211–59.  
5 432 doi:10.1016/S0140-6736(17)32154-2  
6  
7 433 7 Gaziano T. Prevention and treatment of chronic diseases in developing countries. 2011;:1–  
8 434 20.<http://www.un.org/esa/population/publications/expertpapers/2011-2-gaziano.pdf>  
9  
10 435 8 Allen L, Williams J, Townsend N, *et al.* Socioeconomic status and non-communicable disease  
11 436 behavioural risk factors in low-income and lower-middle-income countries: a systematic  
12 437 review. *Lancet Glob Heal* 2017;**5**:e277–89. doi:10.1016/S2214-109X(17)30058-X  
13  
14 438 9 Rosengren A, Smyth A, Rangarajan S, *et al.* Socioeconomic status and risk of cardiovascular  
15 439 disease in 20 low-income, middle-income, and high-income countries: the Prospective Urban  
16 440 Rural Epidemiologic (PURE) study. *Lancet Glob Heal* 2019;**7**:e748–60. doi:10.1016/S2214-  
17 441 109X(19)30045-2  
18  
19 442 10 WHO. Package of Essential Noncommunicable (PEN) Disease Interventions for Primary Health  
20 443 Care. *Geneva World Heal Organ* 2010;:1–66.papers2://publication/uuid/FC98856B-4122-  
21 444 4325-826F-20FA6B89DEBD  
22  
23 445 11 Ferdianto A, Tamtomo DG, Sulaeman ES. Does the Integrated Health Post have Contextual  
24 446 Effect on Tertiary Preventive Behavior among Hypertensive Patients? A Multilevel Analysis  
25 447 Evidence from Surakarta. *J Heal Promot Behav* 2019;**4**:224–34.  
26 448 doi:10.26911/thejhp.2019.04.03.07  
27  
28 449 12 Khoe LC, Wangge G, Soewondo P, *et al.* The implementation of community-based diabetes  
29 450 and hypertension management care program in Indonesia. *PLoS One* 2020;**15**:1–9.  
30 451 doi:10.1371/journal.pone.0227806  
31  
32 452 13 Yamada M, Hapsari ED, Matsuo H. Behaviors toward noncommunicable diseases prevention  
33 453 and their relationship with physical health status among community-dwelling, middleaged  
34 454 and older women in Indonesia. *Int J Environ Res Public Health* 2020;**17**.  
35 455 doi:10.3390/ijerph17072332  
36  
37 456 14 Maharani A, Sujarwoto, Praveen D, *et al.* Cardiovascular disease risk factor prevalence and  
38 457 estimated 10-year cardiovascular risk scores in Indonesia: The SMARThealth Extend study.  
39 458 *PLoS One* 2019;**14**:1–13. doi:10.1371/journal.pone.0215219  
40  
41 459 15 Turana Y, Teng kawan J, Soenarta AA. Asian management of hypertension: Current status,  
42 460 home blood pressure, and specific concerns in Indonesia. *J Clin Hypertens* 2020;**22**:483–5.  
43 461 doi:10.1111/jch.13681  
44  
45 462 16 Scheltens T, Bots ML, Numans ME, *et al.* Awareness, treatment and control of hypertension:  
46 463 The ‘rule of halves’ in an era of risk-based treatment of hypertension. *J Hum Hypertens*  
47 464 2007;**21**:99–106. doi:10.1038/sj.jhh.1002123  
48  
49 465 17 Chen R, Tunstall-Pedoe H, Morrison C, *et al.* Trends and social factors in blood pressure  
50 466 control in Scottish MONICA surveys 1986-1995: The rule of halves revisited. *J Hum Hypertens*  
51 467 2003;**17**:751–9. doi:10.1038/sj.jhh.1001612  
52  
53 468 18 Alfiah A, Pujiyanto P. an Analysis on the Implementation of the Integrated Guidance Post  
54 469 (Posbindu) Activities for Non-Communicable Diseases At Bogor City in 2018. *J Indones Heal*  
55 470 *Policy Adm* 2019;**4**:11–5. doi:10.7454/ihpa.v4i1.2388  
56  
57 471 19 Ministry of Health (MOH) - Kementerian Kesehatan. Petunjuk Teknis Pos Pembinaan Terpadu  
58 472 Penyakit Tidak Menular (Posbindu PTM). 2012.  
59 473 <http://p2ptm.kemkes.go.id/uploads/2016/10/Petunjuk-Teknis-Pos-Pembinaan-Terpadu->  
60

- 1  
2  
3 474 Penyakit-Tidak-Menular-POSBINDU-PTM-2013.pdf  
4  
5 475 20 Moeloek NF. Indonesia national health policy in the transition of disease burden and health  
6 476 insurance coverage. *Med J Indones* 2017;**26**:3–6. doi:10.13181/mji.v26i1.1975  
7  
8 477 21 Ministry of Health (MOH) - Kementerian Kesehatan. Riskesdas Main Results 2018. 2018.  
9 478 <https://www.litbang.kemkes.go.id/hasil-utama-riskesdas-2018/>  
10  
11 479 22 Smith JD, Li DH, Rafferty MR. The implementation research logic model: A method for  
12 480 planning, executing, reporting, and synthesizing implementation projects. *medRxiv* 2020;:1–  
13 481 12. doi:10.1101/2020.04.05.20054379  
14  
15 482 23 Sharma S, Adetoro OO, Vidler M, *et al.* A process evaluation plan for assessing a complex  
16 483 community-based maternal health intervention in Ogun State, Nigeria. *BMC Health Serv Res*  
17 484 2017;**17**:1–10. doi:10.1186/s12913-017-2124-4  
18  
19 485 24 Wong ST, Yin D, Bhattacharyya O, *et al.* Developing a performance measurement framework  
20 486 and indicators for community health service facilities in urban China. *BMC Fam Pract*  
21 487 2010;**11**. doi:10.1186/1471-2296-11-91  
22  
23 488 25 Feters MD, Curry LA, Creswell JW. Achieving integration in mixed methods designs -  
24 489 Principles and practices. *Health Serv Res* 2013;**48**:2134–56. doi:10.1111/1475-6773.12117  
25  
26 490 26 Sudharsanan N, Geldsetzer P. Impact of coming demographic changes on the number of  
27 491 adults in need of care for hypertension in Brazil, China, India, Indonesia, Mexico, and South  
28 492 Africa: A modeling study. *Hypertension* 2019;**73**:770–6.  
29 493 doi:10.1161/HYPERTENSIONAHA.118.12337  
30  
31 494 27 Rahmawati R, Bajorek B V. Access to medicines for hypertension: A survey in rural Yogyakarta  
32 495 province, Indonesia. *Rural Remote Health* 2018;**18**. doi:10.22605/RRH4393  
33  
34 496 28 Amalia B, Cadogan SL, Prabandari YS, *et al.* Socio-demographic inequalities in cigarette  
35 497 smoking in Indonesia, 2007 to 2014. *Prev Med (Baltim)* 2019;**123**:27–33.  
36 498 doi:10.1016/j.ypmed.2019.02.025  
37  
38 499 29 Sujarwoto S. Sleep Disturbance in Indonesia: How Much Does Smoking Contribute? *Behav*  
39 500 *Sleep Med* 2019;**00**:1–14. doi:10.1080/15402002.2019.1682584  
40  
41 501 30 Kusumawardani N, Tarigan I, Suparmi, *et al.* Socio-economic, demographic and geographic  
42 502 correlates of cigarette smoking among Indonesian adolescents: results from the 2013  
43 503 Indonesian Basic Health Research (RISKESDAS) survey. *Glob Health Action* 2018;**11**.  
44 504 doi:10.1080/16549716.2018.1467605  
45  
46 505 31 Kristina SA, Endarti D, Wiedyaningsih C, *et al.* Health Care Cost of Noncommunicable Diseases  
47 506 Related to Smoking in Indonesia, 2015. *Asia-Pacific J Public Heal* 2018;**30**:29–35.  
48 507 doi:10.1177/1010539517751311  
49  
50 508 32 Saif-Ur-Rahman KM, Hasan M, Hossain S, *et al.* Non-pharmacological interventions for the  
51 509 prevention of hypertension in low-income and middle-income countries: Protocol for a  
52 510 systematic review and meta-analysis. *BMJ Open* 2018;**8**:6–11. doi:10.1136/bmjopen-2017-  
53 511 020724  
54  
55 512 33 Pantell MS, Prather AA, Downing JM, *et al.* Association of Social and Behavioral Risk Factors  
56 513 With Earlier Onset of Adult Hypertension and Diabetes. *JAMA Netw open* 2019;**2**:e193933.  
57 514 doi:10.1001/jamanetworkopen.2019.3933  
58  
59 515 34 Kusuma D, Kusumawardani N, Ahsan A, *et al.* On the verge of a chronic disease epidemic:  
60 516 Comprehensive policies and actions are needed in Indonesia. *Int Health* 2019;**11**:422–4.

- 1  
2  
3 517 doi:10.1093/inthealth/ihz025  
4  
5 518 35 Mboi N, Murty Surbakti I, Trihandini I, *et al.* On the road to universal health care in Indonesia,  
6 519 1990–2016: a systematic analysis for the Global Burden of Disease Study 2016. *Lancet*  
7 520 2018;**392**:581–91. doi:10.1016/S0140-6736(18)30595-6  
8  
9 521 36 Jayanna K, Swaroop N, Kar A, *et al.* Designing a comprehensive Non-Communicable Diseases  
10 522 (NCD) programme for hypertension and diabetes at primary health care level: Evidence and  
11 523 experience from urban Karnataka, South India. *BMC Public Health* 2019;**19**:1–12.  
12 524 doi:10.1186/s12889-019-6735-z  
13  
14 525 37 Meinema JG, Haafkens JA, Jaarsma DADC, *et al.* Development and evaluation of a culturally  
15 526 appropriate hypertension education (CAHE) training program for health care providers. *PLoS*  
16 527 *One* 2017;**12**:1–13. doi:10.1371/journal.pone.0178468  
17  
18 528 38 Abdel-All M, Thrift AG, Riddell M, *et al.* Evaluation of a training program of hypertension for  
19 529 accredited social health activists (ASHA) in rural India. *BMC Health Serv Res* 2018;**18**:1–11.  
20 530 doi:10.1186/s12913-018-3140-8  
21  
22 531 39 Ng JYS, Ramadani RV, Hendrawan D, *et al.* National Health Insurance Databases in Indonesia,  
23 532 Vietnam and the Philippines. *PharmacoEconomics - Open* 2019;**3**:517–26.  
24 533 doi:10.1007/s41669-019-0127-2  
25  
26 534 40 Erlangga D, Ali S, Bloor K. The impact of public health insurance on healthcare utilisation in  
27 535 Indonesia: evidence from panel data. *Int J Public Health* 2019;**64**:603–13.  
28 536 doi:10.1007/s00038-019-01215-2  
29  
30 537 41 Sharma M, Teerawattananon Y, Luz A, *et al.* Institutionalizing Evidence-Informed Priority  
31 538 Setting for Universal Health Coverage: Lessons From Indonesia. *Inq (United States)* 2020;**57**.  
32 539 doi:10.1177/0046958020924920  
33  
34 540 42 Vidyattama Y, Miranti R, Resosudarmo BP. The Role of Health Insurance Membership in  
35 541 Health Service Utilisation in Indonesia. *Bull Indones Econ Stud* 2014;**50**:393–413.  
36 542 doi:10.1080/00074918.2014.980380  
37  
38 543 43 Ministry of Health (MOH) - Kementerian Kesehatan. Pandu PTM A Community on  
39 544 intervention model and control's of NCD's. 2017.  
40  
41 545 44 Wang Z, Wang X, Shen Y, *et al.* Effect of a Workplace-Based Multicomponent Intervention on  
42 546 Hypertension Control: A Randomized Clinical Trial. *JAMA Cardiol* 2020;**5**:567–75.  
43 547 doi:10.1001/jamacardio.2019.6161  
44  
45 548 45 Reif J, Chan D, Jones D, *et al.* Effects of a Workplace Wellness Program on Employee Health,  
46 549 Health Beliefs, and Medical Use: A Randomized Clinical Trial. *JAMA Intern Med*  
47 550 2020;**180**:952–60. doi:10.1001/jamainternmed.2020.1321  
48  
49 551 46 Patel A, Praveen D, Maharani A, *et al.* Association of Multifaceted Mobile Technology-  
50 552 Enabled Primary Care Intervention with Cardiovascular Disease Risk Management in Rural  
51 553 Indonesia. *JAMA Cardiol* 2019;**4**:978–86. doi:10.1001/jamacardio.2019.2974  
52  
53 554 47 Persell SD, Peprah YA, Lipiszko D, *et al.* Effect of Home Blood Pressure Monitoring via a  
54 555 Smartphone Hypertension Coaching Application or Tracking Application on Adults With  
55 556 Uncontrolled Hypertension: A Randomized Clinical Trial. *JAMA Netw open* 2020;**3**:e200255.  
56 557 doi:10.1001/jamanetworkopen.2020.0255  
57  
58 558  
59  
60

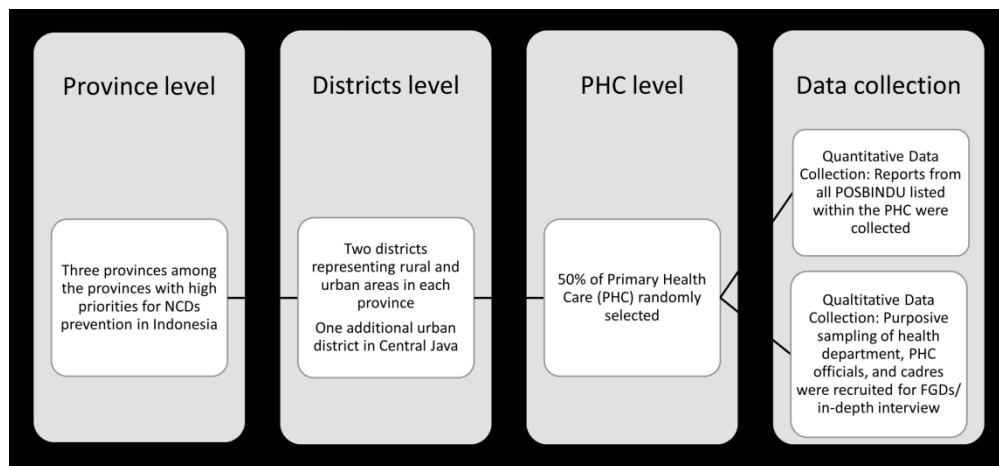

Figure 1. Study Sample Selection

258x119mm (300 x 300 DPI)

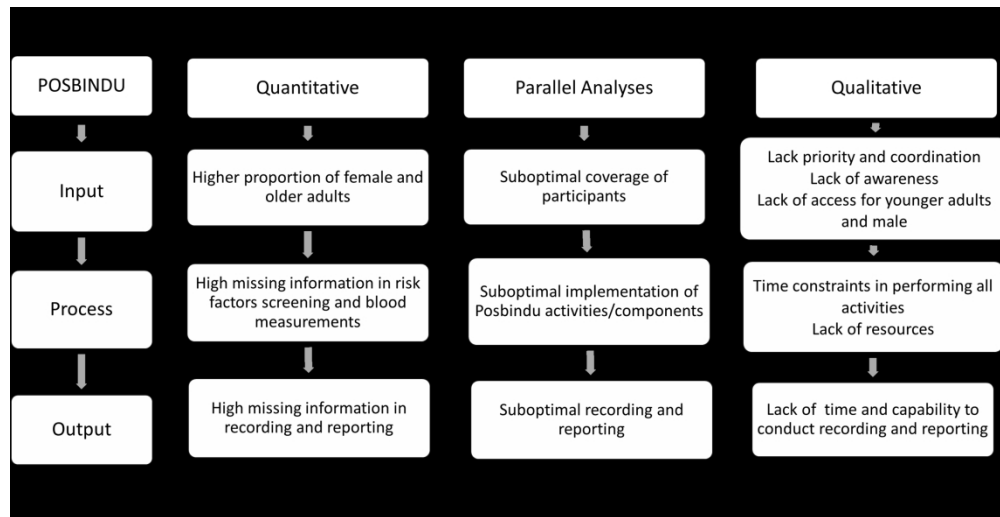

Figure 2. Synthesis of the Quantitative and Qualitative Findings

240x123mm (300 x 300 DPI)

STROBE Statement—Checklist of items that should be included in reports of *cross-sectional studies*

|                              | Item No | Recommendation                                                                                                                                                                                    | Page No                         |
|------------------------------|---------|---------------------------------------------------------------------------------------------------------------------------------------------------------------------------------------------------|---------------------------------|
| <b>Title and abstract</b>    | 1       | (a) Indicate the study's design with a commonly used term in the title or the abstract                                                                                                            | Page 1                          |
|                              |         | (b) Provide in the abstract an informative and balanced summary of what was done and what was found                                                                                               | Page 1                          |
| <b>Introduction</b>          |         |                                                                                                                                                                                                   |                                 |
| Background/rationale         | 2       | Explain the scientific background and rationale for the investigation being reported                                                                                                              | Page 2                          |
| Objectives                   | 3       | State specific objectives, including any prespecified hypotheses                                                                                                                                  | Page 2-3                        |
| <b>Methods</b>               |         |                                                                                                                                                                                                   |                                 |
| Study design                 | 4       | Present key elements of study design early in the paper                                                                                                                                           | Page 3                          |
| Setting                      | 5       | Describe the setting, locations, and relevant dates, including periods of recruitment, exposure, follow-up, and data collection                                                                   | Page 3                          |
| Participants                 | 6       | (a) Give the eligibility criteria, and the sources and methods of selection of participants                                                                                                       | Page 3                          |
| Variables                    | 7       | Clearly define all outcomes, exposures, predictors, potential confounders, and effect modifiers. Give diagnostic criteria, if applicable                                                          | Page 4                          |
| Data sources/<br>measurement | 8*      | For each variable of interest, give sources of data and details of methods of assessment (measurement). Describe comparability of assessment methods if there is more than one group              | Page 4                          |
| Bias                         | 9       | Describe any efforts to address potential sources of bias                                                                                                                                         | N/A,<br>descriptive<br>analyses |
| Study size                   | 10      | Explain how the study size was arrived at                                                                                                                                                         | Page 3                          |
| Quantitative variables       | 11      | Explain how quantitative variables were handled in the analyses. If applicable, describe which groupings were chosen and why                                                                      | Page 4                          |
| Statistical methods          | 12      | (a) Describe all statistical methods, including those used to control for confounding                                                                                                             | Page 4                          |
|                              |         | (b) Describe any methods used to examine subgroups and interactions                                                                                                                               | Page 4                          |
|                              |         | (c) Explain how missing data were addressed                                                                                                                                                       | Page 4                          |
|                              |         | (d) If applicable, describe analytical methods taking account of sampling strategy                                                                                                                | N/A                             |
|                              |         | (e) Describe any sensitivity analyses                                                                                                                                                             | N/A                             |
| <b>Results</b>               |         |                                                                                                                                                                                                   |                                 |
| Participants                 | 13*     | (a) Report numbers of individuals at each stage of study—eg numbers potentially eligible, examined for eligibility, confirmed eligible, included in the study, completing follow-up, and analysed | Page 4                          |
|                              |         | (b) Give reasons for non-participation at each stage                                                                                                                                              | N/A                             |
|                              |         | (c) Consider use of a flow diagram                                                                                                                                                                | Page 4<br>(referred)            |
| Descriptive data             | 14*     | (a) Give characteristics of study participants (eg demographic, clinical, social) and information on exposures and potential confounders                                                          | Page 5                          |
|                              |         | (b) Indicate number of participants with missing data for each variable of interest                                                                                                               | Page 6                          |

|                          |     |                                                                                                                                                                                                              |                           |
|--------------------------|-----|--------------------------------------------------------------------------------------------------------------------------------------------------------------------------------------------------------------|---------------------------|
| Outcome data             | 15* | Report numbers of outcome events or summary measures                                                                                                                                                         | Page 6                    |
| Main results             | 16  | (a) Give unadjusted estimates and, if applicable, confounder-adjusted estimates and their precision (eg, 95% confidence interval). Make clear which confounders were adjusted for and why they were included | N/A, descriptive analyses |
|                          |     | (b) Report category boundaries when continuous variables were categorized                                                                                                                                    | Page 5-6                  |
|                          |     | (c) If relevant, consider translating estimates of relative risk into absolute risk for a meaningful time period                                                                                             | N/A                       |
| Other analyses           | 17  | Report other analyses done—eg analyses of subgroups and interactions, and sensitivity analyses                                                                                                               | N/A                       |
| <b>Discussion</b>        |     |                                                                                                                                                                                                              |                           |
| Key results              | 18  | Summarise key results with reference to study objectives                                                                                                                                                     | Page 10                   |
| Limitations              | 19  | Discuss limitations of the study, taking into account sources of potential bias or imprecision. Discuss both direction and magnitude of any potential bias                                                   | Page 11                   |
| Interpretation           | 20  | Give a cautious overall interpretation of results considering objectives, limitations, multiplicity of analyses, results from similar studies, and other relevant evidence                                   | Page 11                   |
| Generalisability         | 21  | Discuss the generalisability (external validity) of the study results                                                                                                                                        | Page 12                   |
| <b>Other information</b> |     |                                                                                                                                                                                                              |                           |
| Funding                  | 22  | Give the source of funding and the role of the funders for the present study and, if applicable, for the original study on which the present article is based                                                | Page 12                   |

\*Give information separately for exposed and unexposed groups.

**Note:** An Explanation and Elaboration article discusses each checklist item and gives methodological background and published examples of transparent reporting. The STROBE checklist is best used in conjunction with this article (freely available on the Web sites of PLoS Medicine at <http://www.plosmedicine.org/>, Annals of Internal Medicine at <http://www.annals.org/>, and Epidemiology at <http://www.epidem.com/>). Information on the STROBE Initiative is available at [www.strobe-statement.org](http://www.strobe-statement.org).



# Standards for Reporting Qualitative Research (SRQR)\*

<http://www.equator-network.org/reporting-guidelines/srqr/>

Page/line no(s).

## Title and abstract

|                                                                                                                                                                                                                                                              |                          |
|--------------------------------------------------------------------------------------------------------------------------------------------------------------------------------------------------------------------------------------------------------------|--------------------------|
| <p><b>Title</b> - Concise description of the nature and topic of the study Identifying the study as qualitative or indicating the approach (e.g., ethnography, grounded theory) or data collection methods (e.g., interview, focus group) is recommended</p> | <p>Page 1/Line 1</p>     |
| <p><b>Abstract</b> - Summary of key elements of the study using the abstract format of the intended publication; typically includes background, purpose, methods, results, and conclusions</p>                                                               | <p>Page 1/Line 14-36</p> |

## Introduction

|                                                                                                                                                                     |                          |
|---------------------------------------------------------------------------------------------------------------------------------------------------------------------|--------------------------|
| <p><b>Problem formulation</b> - Description and significance of the problem/phenomenon studied; review of relevant theory and empirical work; problem statement</p> | <p>Page 2/Line 53-77</p> |
| <p><b>Purpose or research question</b> - Purpose of the study and specific objectives or questions</p>                                                              | <p>Page 2/Line 80-82</p> |

## Methods

|                                                                                                                                                                                                                                                                                                                                                                                                             |                             |
|-------------------------------------------------------------------------------------------------------------------------------------------------------------------------------------------------------------------------------------------------------------------------------------------------------------------------------------------------------------------------------------------------------------|-----------------------------|
| <p><b>Qualitative approach and research paradigm</b> - Qualitative approach (e.g., ethnography, grounded theory, case study, phenomenology, narrative research) and guiding theory if appropriate; identifying the research paradigm (e.g., postpositivist, constructivist/ interpretivist) is also recommended; rationale**</p>                                                                            | <p>Page 2/Line 98</p>       |
| <p><b>Researcher characteristics and reflexivity</b> - Researchers' characteristics that may influence the research, including personal attributes, qualifications/experience, relationship with participants, assumptions, and/or presuppositions; potential or actual interaction between researchers' characteristics and the research questions, approach, methods, results, and/or transferability</p> | <p>Page 3/ Line 116-119</p> |
| <p><b>Context</b> - Setting/site and salient contextual factors; rationale**</p>                                                                                                                                                                                                                                                                                                                            | <p>Page 3/ Line 85-93</p>   |
| <p><b>Sampling strategy</b> - How and why research participants, documents, or events were selected; criteria for deciding when no further sampling was necessary (e.g., sampling saturation); rationale**</p>                                                                                                                                                                                              | <p>Page 3/ Line 114-121</p> |
| <p><b>Ethical issues pertaining to human subjects</b> - Documentation of approval by an appropriate ethics review board and participant consent, or explanation for lack thereof; other confidentiality and data security issues</p>                                                                                                                                                                        | <p>Page 3/Line 100-102</p>  |
| <p><b>Data collection methods</b> - Types of data collected; details of data collection procedures including (as appropriate) start and stop dates of data collection and analysis, iterative process, triangulation of sources/methods, and modification of procedures in response to evolving study findings; rationale**</p>                                                                             | <p>Page 3/ Line 114-125</p> |

|    |                                                                                         |              |
|----|-----------------------------------------------------------------------------------------|--------------|
| 1  |                                                                                         |              |
| 2  | <b>Data collection instruments and technologies</b> - Description of instruments (e.g., |              |
| 3  | interview guides, questionnaires) and devices (e.g., audio recorders) used for data     | Page 3/Line  |
| 4  | collection; if/how the instrument(s) changed over the course of the study               | 148-150      |
| 5  |                                                                                         |              |
| 6  | <b>Units of study</b> - Number and relevant characteristics of participants, documents, | Page 3/ Line |
| 7  | or events included in the study; level of participation (could be reported in results)  | 114-116      |
| 8  |                                                                                         |              |
| 9  | <b>Data processing</b> - Methods for processing data prior to and during analysis,      |              |
| 10 | including transcription, data entry, data management and security, verification of      | Page 3/ Line |
| 11 | data integrity, data coding, and anonymization/de-identification of excerpts            | 156-167      |
| 12 |                                                                                         |              |
| 13 | <b>Data analysis</b> - Process by which inferences, themes, etc., were identified and   |              |
| 14 | developed, including the researchers involved in data analysis; usually references a    | Page 3/ Line |
| 15 | specific paradigm or approach; rationale**                                              | 158-160      |
| 16 |                                                                                         |              |
| 17 | Techniques to enhance trustworthiness - Techniques to enhance trustworthiness           |              |
| 18 | and credibility of data analysis (e.g., member checking, audit trail, triangulation);   | Page 3/ Line |
| 19 | rationale**                                                                             | 160/163      |
| 20 |                                                                                         |              |

## Results/findings

|    |                                                                                             |              |
|----|---------------------------------------------------------------------------------------------|--------------|
| 21 |                                                                                             |              |
| 22 |                                                                                             |              |
| 23 | <b>Synthesis and interpretation</b> - Main findings (e.g., interpretations, inferences, and |              |
| 24 | themes); might include development of a theory or model, or integration with                | Page 7/ Line |
| 25 | prior research or theory                                                                    | 209-215      |
| 26 |                                                                                             |              |
| 27 | <b>Links to empirical data</b> - Evidence (e.g., quotes, field notes, text excerpts,        | Page 8/Line  |
| 28 | photographs) to substantiate analytic findings                                              | 218-261      |
| 29 |                                                                                             |              |

## Discussion

|    |                                                                                           |              |
|----|-------------------------------------------------------------------------------------------|--------------|
| 30 |                                                                                           |              |
| 31 |                                                                                           |              |
| 32 | <b>Integration with prior work, implications, transferability, and contribution(s) to</b> |              |
| 33 | <b>the field</b> - Short summary of main findings; explanation of how findings and        |              |
| 34 | conclusions connect to, support, elaborate on, or challenge conclusions of earlier        | Page 10/Line |
| 35 | scholarship; discussion of scope of application/generalizability; identification of       | 279-319      |
| 36 | unique contribution(s) to scholarship in a discipline or field                            |              |
| 37 |                                                                                           | Page 11/Line |
| 38 | <b>Limitations</b> - Trustworthiness and limitations of findings                          | 353-356      |
| 39 |                                                                                           |              |
| 40 |                                                                                           |              |

## Other

|    |                                                                                            |              |
|----|--------------------------------------------------------------------------------------------|--------------|
| 41 |                                                                                            |              |
| 42 |                                                                                            |              |
| 43 | <b>Conflicts of interest</b> - Potential sources of influence or perceived influence on    | Page 12/Line |
| 44 | study conduct and conclusions; how these were managed                                      | 386          |
| 45 |                                                                                            |              |
| 46 | <b>Funding</b> - Sources of funding and other support; role of funders in data collection, | Page 12/Line |
| 47 | interpretation, and reporting                                                              | 381-383      |
| 48 |                                                                                            |              |

\*The authors created the SRQR by searching the literature to identify guidelines, reporting standards, and critical appraisal criteria for qualitative research; reviewing the reference lists of retrieved sources; and contacting experts to gain feedback. The SRQR aims to improve the transparency of all aspects of qualitative research by providing clear standards for reporting qualitative research.

1  
2  
3  
4  
5  
6  
7  
8  
9  
10  
11  
12  
13  
14  
15  
16  
17  
18  
19  
20  
21  
22  
23  
24  
25  
26  
27  
28  
29  
30  
31  
32  
33  
34  
35  
36  
37  
38  
39  
40  
41  
42  
43  
44  
45  
46  
47  
48  
49  
50  
51  
52  
53  
54  
55  
56  
57  
58  
59  
60

\*\*The rationale should briefly discuss the justification for choosing that theory, approach, method, or technique rather than other options available, the assumptions and limitations implicit in those choices, and how those choices influence study conclusions and transferability. As appropriate, the rationale for several items might be discussed together.

**Reference:**

O'Brien BC, Harris IB, Beckman TJ, Reed DA, Cook DA. **Standards for reporting qualitative research: a synthesis of recommendations.** *Academic Medicine*, Vol. 89, No. 9 / Sept 2014  
DOI: 10.1097/ACM.0000000000000388

For peer review only

# BMJ Open

## Missed Opportunities in Hypertension Risk Factors Screening in Indonesia: A Mixed-methods Evaluation of Integrated Health Post (POSBINDU) Implementation

|                                 |                                                                                                                                                                                                                                                                                                                                                                                                                                                                                                                                                                                                    |
|---------------------------------|----------------------------------------------------------------------------------------------------------------------------------------------------------------------------------------------------------------------------------------------------------------------------------------------------------------------------------------------------------------------------------------------------------------------------------------------------------------------------------------------------------------------------------------------------------------------------------------------------|
| Journal:                        | <i>BMJ Open</i>                                                                                                                                                                                                                                                                                                                                                                                                                                                                                                                                                                                    |
| Manuscript ID                   | bmjopen-2021-051315.R2                                                                                                                                                                                                                                                                                                                                                                                                                                                                                                                                                                             |
| Article Type:                   | Original research                                                                                                                                                                                                                                                                                                                                                                                                                                                                                                                                                                                  |
| Date Submitted by the Author:   | 27-Jan-2022                                                                                                                                                                                                                                                                                                                                                                                                                                                                                                                                                                                        |
| Complete List of Authors:       | Widyaningsih, Vitri; Universitas Sebelas Maret, Public Health Febrinasari, Ratih; Universitas Sebelas Maret, Pharmacology Pamungkasari, Eti; Universitas Sebelas Maret, Public Health Mashuri, Yusuf; Universitas Sebelas Maret, Parasitology Sumardiyono, Sumardiyono; Universitas Sebelas Maret, Public Health Balgis, Balgis; Universitas Sebelas Maret, Public Health Koot, Jaap; University Medical Centre Groningen, Department of Health Sciences Landsman-Dijkstra, Jeanet; University Medical Centre Groningen, Department of Health Sciences Probandari, Ari; Universitas Sebelas Maret, |
| <b>Primary Subject Heading</b>: | Public health                                                                                                                                                                                                                                                                                                                                                                                                                                                                                                                                                                                      |
| Secondary Subject Heading:      | Global health, Epidemiology, Health services research                                                                                                                                                                                                                                                                                                                                                                                                                                                                                                                                              |
| Keywords:                       | Hypertension < CARDIOLOGY, International health services < HEALTH SERVICES ADMINISTRATION & MANAGEMENT, PUBLIC HEALTH, Quality in health care < HEALTH SERVICES ADMINISTRATION & MANAGEMENT                                                                                                                                                                                                                                                                                                                                                                                                        |
|                                 |                                                                                                                                                                                                                                                                                                                                                                                                                                                                                                                                                                                                    |

SCHOLARONE™  
Manuscripts



I, the Submitting Author has the right to grant and does grant on behalf of all authors of the Work (as defined in the below author licence), an exclusive licence and/or a non-exclusive licence for contributions from authors who are: i) UK Crown employees; ii) where BMJ has agreed a CC-BY licence shall apply, and/or iii) in accordance with the terms applicable for US Federal Government officers or employees acting as part of their official duties; on a worldwide, perpetual, irrevocable, royalty-free basis to BMJ Publishing Group Ltd ("BMJ") its licensees and where the relevant Journal is co-owned by BMJ to the co-owners of the Journal, to publish the Work in this journal and any other BMJ products and to exploit all rights, as set out in our [licence](#).

The Submitting Author accepts and understands that any supply made under these terms is made by BMJ to the Submitting Author unless you are acting as an employee on behalf of your employer or a postgraduate student of an affiliated institution which is paying any applicable article publishing charge ("APC") for Open Access articles. Where the Submitting Author wishes to make the Work available on an Open Access basis (and intends to pay the relevant APC), the terms of reuse of such Open Access shall be governed by a Creative Commons licence – details of these licences and which [Creative Commons](#) licence will apply to this Work are set out in our licence referred to above.

Other than as permitted in any relevant BMJ Author's Self Archiving Policies, I confirm this Work has not been accepted for publication elsewhere, is not being considered for publication elsewhere and does not duplicate material already published. I confirm all authors consent to publication of this Work and authorise the granting of this licence.

## 1 Missed Opportunities in Hypertension Risk Factors Screening in Indonesia: A Mixed-methods 2 Evaluation of Integrated Health Post (POSBINDU) Implementation

3 Vitri Widyaningsih<sup>1</sup>, Ratih Puspita Febrinasari<sup>1</sup>, Eti Poncorini Pamungkasari<sup>1</sup>, Yusuf Ari Mashuri<sup>1</sup>,  
4 Sumardiyono<sup>1</sup>, Balgis<sup>1</sup>, Jaap Koot<sup>2</sup>, Jeanet Landsman-Dijkstra<sup>2</sup>, Ari Probandari<sup>1</sup> on behalf of Scaling Up Non-  
5 Communicable Disease Intervention in South East Asia (SUNISEA) Project

6 <sup>1</sup>Faculty of Medicine, Universitas Sebelas Maret, Surakarta, Indonesia

7 <sup>2</sup> University of Groningen, University Medical Center Groningen, Department of Health Sciences, The  
8 Netherlands

9 Corresponding author: Prof. dr. Ari Natalia Probandari, MPH., Ph.D. Faculty of Medicine Universitas  
10 Sebelas Maret Surakarta, 57126, Central Java, Indonesia [ari.probandari@staff.uns.ac.id](mailto:ari.probandari@staff.uns.ac.id)  
11 Phone: (0271) 646994

### 12 Abstract

13 **Objectives:** To assess the implementation and contextual barriers of POSBINDU, a community-based  
14 activity focusing on screening of Non-Communicable Diseases (NCDs), mainly hypertension and  
15 diabetes, in Indonesia.

16 **Design:** This was a concurrent mixed-methods study, with a cross-sectional analysis of secondary data  
17 and Focus Group Discussions on stakeholder of POSBINDU.

18 **Setting:** The study was conducted in seven districts in three provinces in Indonesia, with  
19 approximately 50% of the Primary Health Care (PHC) were selected as areas for data collection (n  
20 PHC=100).

21 **Participants:** From 475 POSBINDU sites, we collected secondary data from 54,224 participants. For  
22 the qualitative approach, 21 focus group discussions (FGDs) and 2 in-depth interviews were held  
23 among a total of 223 informants.

24 **Primary outcomes and measures:** Proportion of POSBINDU visitors getting the hypertension  
25 screening and risk factors' assessment, and barriers of POSBINDU implementation.

26 **Results:** Out of the 114,581 POSBINDU visits by 54,224 participants, most (80%) were female and  
27 adults over 50 years old (50%) showing a suboptimal coverage of male and younger adults.  
28 Approximately 95.1% of visitors got their blood pressure measured during their first visit; 35.3% of  
29 whom had elevated blood pressure. Less than 25% of the visitors reported to be interviewed for NCDs  
30 risk factors during their first visit, less than 80% had anthropometric measurements, and less than 15%  
31 had blood cholesterol examinations. We revealed lack of resources and limited time to perform the  
32 complexities of activities and reporting as main barrier for effective hypertension screening in  
33 Indonesia.

34 **Conclusions:** This study showed missed opportunities in hypertension risk factors screening in  
35 Indonesia. The barriers include a lack of access and implementation barriers (capability, resources,  
36 and protocols).

37 **Keywords:** Non-communicable diseases, hypertension, screening, community-based program

### 38 Article Summary

#### 39 Findings

1  
2  
3 41 In a mixed-methods study, we found suboptimal implementation of POSBINDU which reflected the  
4 42 missed opportunities in screening for hypertension and its risk factors in Indonesia. Several barriers  
5 43 include suboptimal coverage, complexities of activities and overlap between different NCD-related  
6 44 programs, and lack of resources.

### 8 9 45 **Implications**

10 46 There is a need to improve coverage and implementation of POSBINDU for screening for hypertension  
11 47 and its risk factors. An integrated approach to improve the implementation of hypertension screening,  
12 48 from guidelines to practice is crucial.

### 14 15 49 **Strengths and Limitations of this study**

- 16  
17 50 • This was a relatively large evaluation of POSBINDU in Indonesia, with almost two years of data.  
18 51 • The findings from mixed-methods study provide more comprehensive information on POSBINDU  
19 52 implementation  
20 53 • Information on the contextual factors of POSBINDU implementation can provide insights into  
21 54 steps to improve POSBINDU in the communities.  
22 55 • The use of secondary data poses variations in blood pressure and anthropometrics  
23 56 measurements.  
24 57 • The study limitation also includes the difficulty in differentiating whether the missed reporting  
25 58 was due to lack of activities or lack of reporting. Nevertheless, both the activities and reporting  
26 59 are important in NCDs screening, particularly in the follow up.

### 29 30 60 **Introduction**

31 61 The increasing trends of Non-Communicable Diseases (NCDs) in the world, including Indonesia,  
32 62 require targeted and specific primary and secondary prevention.[1,2] Hypertension, one of the most  
33 63 common NCDs, has a relatively high (33.4%) prevalence in Indonesia.[3][4] This figure is estimated to  
34 64 increase even further with the changing (more sedentary) lifestyle, unhealthy diet, rising prevalence  
35 65 of obesity, and the increasing life expectancy.[5] In 2015, hypertension attributed to 41% of all  
36 66 disability-adjusted life-years (DALYs) lost, and was the leading risk factor for cardiovascular  
37 67 diseases.[6] Economically, hypertension accounts for \$370 billion in medical costs per year  
38 68 worldwide.[7] Major modifiable risk factors for NCDs include smoking, alcohol consumption,  
39 69 unhealthy diet and obesity, and a sedentary lifestyle.[8,9] With the heavy burden and the economic  
40 70 cost of this disease, primary and secondary prevention for hypertension and its risk factors become  
41 71 very important.

42 72 In 2010, the WHO has recommended the implementation of Package of Essential Interventions for  
43 73 Non-Communicable (PEN) Diseases for low- and middle-income countries.[10] In response, the  
44 74 Ministry of Health (MOH) in Indonesia launched the Integrated Health Post (POSBINDU), as part of the  
45 75 PEN program. POSBINDU, a community-based program for hypertension screening and  
46 76 prevention[11], was added to the several existing NCD-related programs Indonesia. These include  
47 77 Prolanis (Program Pengendalian Penyakit Kronis), a community-based hypertension and diabetes  
48 78 management program affiliated with primary care[12] and Posyandu Lansia, a community-based NCDs  
49 79 screening and management for the elderly.[13] Despite these efforts, the awareness and control of  
50 80 hypertension are still relatively low: only 25% of people with elevated blood pressure are aware of  
51 81 their condition, and only 54% of people diagnosed with hypertension take routine  
52 82 medication.[4,14,15] These conditions are still below the “rule of halves” for hypertension  
53 83 management, which recommends that 50% of hypertension patients be aware of their condition, with  
54 84 half of whom should be treated.[16,17]

1  
2  
3 85 A process evaluation is important in assessing the implementation, to identify barriers, and provide  
4 86 specific recommendations for improvement of POSBINDU. Previous studies have evaluated the  
5 87 effectiveness of the POSBINDU implementation.[11,18] However, they were lacking on the evaluation  
6 88 of contextual barriers in POSBINDU implementation. This study aims to portray the implementation  
7 89 of POSBINDU and its contextual barriers, to provide recommendations for better hypertension and its  
8 90 risk factors screening, and optimal linkage to care in Indonesia.

## 91 **Methods**

### 92 **Setting**

93 POSBINDU is a community-based activity run by community health cadres (volunteers) and supervised  
94 by Primary Health Care (PHC) officials. POSBINDU aims to empower communities in screening for  
95 NCDs and the risk factors, targeting individuals above 15 years old, particularly those of productive  
96 age.[19,20] The main activities include screening for NCDs (mainly hypertension and diabetes) and the  
97 risk factors (i.e., smoking, diet, physical activity, obesity). Further, POSBINDU also provides health  
98 education and facilitate referral to PHC.[19] For this study, we focus on POSBINDU implementation in  
99 screening of hypertension and its risk factor, particularly, since only 30% of hypertensive patients in  
100 Indonesia received formal diagnosis.[15]

### 101 **Study Design**

102 This was a concurrent mixed-methods study in seven districts in three provinces in Indonesia (Central  
103 Java, East Java, and North Sumatra). We purposely selected provinces with relatively high prevalence  
104 of NCDs based on a national health survey conducted in 2018.[21] Cross-sectional study by obtaining  
105 POSBINDU reports were conducted for the quantitative evaluation, whereas case study was  
106 conducted to explore barriers of POSBINDU implementation.

### 107 **Ethnical approval**

108 The study was approved by the ethical review board at Universitas Gadjah Mada, reference number  
109 KE/FK/0648/2019. The participants of Focus Group Discussion gave informed consent before  
110 participating in this study.

### 111 **Data Collection**

112 Within every one of the three provinces, we selected two districts: one city representing urban  
113 communities, and one district representing rural communities. In Central Java, an additional city was  
114 also selected (Figure 1). The rural/urban classification is based on population density and facilities  
115 available in the communities. For each district, approximately 50% of the Primary Health Care (PHC)  
116 were selected as areas for data collection (n PHC=100). Within the PHC, we collected data for  
117 quantitative process evaluation from all active POSBINDU in the areas (n POSBINDU=475). Due to the  
118 different number of POSBINDU within each district or PHCs, the number of POSBINDU visitors as well  
119 as visits varies by the areas. In most POSBINDU, online/electronic data were not available; Hence, data  
120 on participation were manually collected from the POSBINDU register. Data from 2018-2019 were  
121 collected, except for Central Java, in which data were available through September 2019.

122 For the qualitative approach, 21 focus group discussions (FGDs) and 2 in-depth interviews were held  
123 among a total of 223 informants: 22 from Districts Health Department, 101 from Primary Health Care  
124 (PHC) facilities and 100 POSBINDU cadres. The two in-depth interviews were conducted with health  
125 districts department officials. Within each district, we conducted purposive sampling to recruit health  
126 officials responsible for POSBINDU program from the district's health department, and primary health  
127 care. We also recruit 2-3 cadres from each PHC based on list of cadres obtained from PHC officials.  
128 These participants were recruited to obtain information on POSBINDU implementation facilitators and  
129 barriers. The size of the FGDs was on average 10 persons (min 4, max 18). Verbatim transcripts of the



1  
2  
3 130 FGD's were made for qualitative analyses. The FGD facilitators had public health background and  
4 131 experience in conducting qualitative research. All facilitators attended the preparatory meeting to  
5 132 discuss the FGDs and interview guidelines, to obtain similar perception regarding the aims of FGDs  
6 133 and interviews and items of the FGD guidelines.

7  
8  
9 134 Insert Figure 1 here

#### 10 135 Outcome and variables measurements

11 136 Missed opportunities in hypertension screening were quantified by the proportion of POSBINDU  
12 137 visitors getting the risk factors anamnesis, and measurement of anthropometric tests, blood pressure  
13 138 and cholesterol. Analyses was conducted on each indicator to provide more detailed information on  
14 139 specific components of screening which were lacking. Sociodemographic variables which were  
15 140 available on the POSBINDU register, were included in the analyses: sex, age, and level of education.  
16 141 Age was classified into several groups based the Indonesian Ministry of Health classification for age  
17 142 (youth = 15-24 years old, adult = 25-44 years old, pre-elderly = 45-59 years old, and elderly => 60 years  
18 143 old). Occupation was not included in the analyses due to high missing value in the POSBINDU reports  
19 144 (>60%).

20  
21  
22  
23 145 Personal and family history of NCDs were also obtained, which include seven (7) diseases:  
24 146 hypertension, diabetes, heart disease, stroke, asthma, cancer, and high blood cholesterol. Complete  
25 147 personal/family history variables were coded 1 if all information was available and coded 0 if at least  
26 148 one of the disease histories was missing. Any personal/family history variables were coded 1 if at least  
27 149 one of the disease histories was available and coded 0 if all of the history information was missing.

28  
29  
30 150 We also generate variable "incomplete information" which represent whether the individual received  
31 151 the recommended procedure (history taking, anthropometric measurement, blood pressure  
32 152 measurement, and blood examination). The proportion presented in the analyses, described the  
33 153 individuals who did not receive the complete recommended procedure.

34  
35  
36 154 We used the logic model framework for process evaluation to assess the implementation of  
37 155 POSBINDU. We adopted several indicators from the current literature on the use of logic model in  
38 156 process evaluation of community-based health intervention. [22–24] The FGDs theme as well as  
39 157 indicators of the secondary data developed based on the literature, were discussed with officials from  
40 158 health department and PHC officials in one pilot site for finalization. We further explored the barriers  
41 159 of POSBINDU implementation using a qualitative approach.

#### 42 160 Analyses

43  
44 161 Statistical analyses were conducted using STATA, to calculate the proportion of activities and  
45 162 outcomes. We further conduct Chi-square, T-test, and ANOVA to assess the statistical significance of  
46 163 the differences. Analyses were conducted on missing information, reflecting whether specific  
47 164 procedure in POSBINDU were carried out and reported. Further analyses on proportion of  
48 165 hypertension and BMI status were also conducted. The two indicators were reported due to relatively  
49 166 high availability of these data (92% and 76%) compared to other indicators. Verbatim transcript from  
50 167 FGDs and in-depth interviews recordings were analysed. Content analysis was applied for the  
51 168 qualitative data to ascertain barriers for the POSBINDU implementation in Indonesia by two  
52 169 independent researchers. To enhance trustworthiness, we assess barriers of POSBINDU from several  
53 170 sources for triangulation purposes: health and PHC officials to reflect implementer's perspective, and  
54 171 cadres to reflect implementers and users' perspective. During data analyses, we also discuss the  
55 172 findings with representative of the FGD participants, i.e., member checking. Parallel analyses were  
56 173 conducted to synthesize the findings from the quantitative and qualitative approaches. Weaving

174 technique, analysing the quantitative and qualitative findings together by theme or concept, was used  
175 to integrate the findings.[25]

### 176 Patients and public involvement

177 Patients or the public were not directly involved in the design, or conduct, or reporting, or  
178 dissemination plans of our research.

## 179 Results

### 180 Participation of community for hypertension screening in POSBINDU

181 Data from 114,581 POSBINDU visits (54,224 participants) were analysed. The findings showed similar  
182 patterns in the districts and provinces: more female and elderly participants. Approximately 80% were  
183 female participants, with the highest proportion of female participants in rural North Sumatra (95.5%).  
184 Meanwhile, in Java, a higher proportion of female participants were observed in urban areas (Table  
185 1).

186 Table 1. Characteristics of POSBINDU Participants within the Three Provinces in Indonesia  
187 (POSBINDU Register, 2018-2019)

| Characteristics                  | North Sumatra |            | East Java  |            | Central Java |            | Total      |
|----------------------------------|---------------|------------|------------|------------|--------------|------------|------------|
|                                  | Rural         | Urban      | Rural      | Urban      | Rural        | Urban      |            |
| Number of individuals            | 5,103         | 10,999     | 23,053     | 4,983      | 3,398        | 6,688      | 54,224     |
| Number of PHC                    | 11            | 23         | 29         | 9          | 11           | 17         | 100        |
| Number of POSBINDU               | 38            | 38         | 283        | 27         | 27           | 62         | 475        |
| <b>Categorical (%<br/>SE)</b>    |               |            |            |            |              |            |            |
| Female                           | 95.5 (0.3)    | 71.3 (0.4) | 76.2 (0.3) | 86.7 (0.5) | 73.7 (0.8)   | 88.2 (0.4) | 79.4 (0.2) |
| Age                              |               |            |            |            |              |            |            |
| 15-24                            | 8.7 (0.4)     | 6.1 (0.3)  | 6.2 (0.2)  | 7.8 (0.4)  | 13.3 (0.7)   | 3.8 (0.3)  | 6.7 (0.1)  |
| 25-44                            | 38.1 (0.8)    | 24.9 (0.5) | 33.0 (0.3) | 48.7 (0.8) | 47.7 (1.0)   | 28.9 (0.7) | 22.2 (0.2) |
| 45-59                            | 30.7 (0.7)    | 37.6 (0.6) | 33.2 (0.3) | 31.0 (0.6) | 30.1 (0.9)   | 42.4 (0.7) | 24.8 (0.2) |
| >60                              | 22.4 (0.6)    | 31.3 (0.6) | 27.6 (0.3) | 12.5 (0.5) | 8.9 (0.6)    | 24.9 (0.6) | 24.7 (0.2) |
| Education**                      |               |            |            |            |              |            |            |
| PS                               | 2.6 (0.2)     | 15.3 (0.3) | 57.3 (0.3) | 50.5 (0.7) | 41.1 (0.8)   | 25.2 (0.5) | 38.0 (0.2) |
| HS                               | 0.3 (0.07)    | 0.7 (0.1)  | 0.3 (0.0)  | 1.3 (0.2)  | 2.3 (0.3)    | 1.8 (0.2)  | 0.8 (0.0)  |
| Univ                             | 0.0 (0.0)     | 2.7 (0.2)  | 0.4 (0.04) | 4.9 (0.3)  | 4.9 (0.4)    | 2.1 (0.2)  | 1.8 (0.1)  |
| Missing                          | 97.1 (0.2)    | 81.4 (0.4) | 41.9 (0.3) | 43.3 (0.7) | 51.8 (0.9)   | 70.8 (0.6) | 59.4 (0.2) |
| Number of visits                 |               |            |            |            |              |            |            |
| 1 time                           | 87.0 (0.4)    | 77.4 (0.3) | 68.4 (0.3) | 65.6 (0.7) | 84.5 (0.6)   | 56.4 (0.6) | 71.2 (0.1) |
| 2-6 times                        | 12.9 (0.5)    | 21.7 (0.3) | 21.1 (0.2) | 23.9 (0.6) | 13.3 (0.6)   | 35.1 (0.6) | 22.0 (0.1) |
| 7-12 times                       | 0.1 (0.0)     | 0.6 (0.1)  | 6.3 (0.2)  | 6.0 (0.3)  | 2.1 (0.2)    | 5.9 (0.3)  | 5.3 (0.1)  |
| >12 times                        | 0 (0.0)       | 0.2 (0.1)  | 4.1 (0.1)  | 4.5 (0.3)  | 0.1 (0.0)    | 2.6 (0.2)  | 1.4 (0.1)  |
| <b>Continuous<br/>(mean, SE)</b> |               |            |            |            |              |            |            |
| Age                              | 46.4 (0.2)    | 51.7 (0.2) | 49.7 (0.1) | 43.4 (0.2) | 41.0 (0.3)   | 50.4 (0.2) | 48.6 (0.8) |
| Number of visits                 | 1.2 (0.8)     | 1.4 (0.1)  | 2.5 (0.2)  | 2.7 (0.5)  | 1.4 (0.2)    | 2.5 (0.3)  | 2.1 (0.1)  |

188 Notes:

189 Within province, rural-urban comparisons are significant at 0.05

190 Between provinces comparisons are significant at 0.05  
 191 Differences in proportion tested using Chi squares  
 192 SE= standard error  
 193 \*\*Education = HS (High school) PS (Primary school/less) Univ (University/college), Missing = data  
 194 missing

196 Despite the relatively high missing information on age (n missing= 12,084, or 22.3%), we found that  
 197 the participants were on average of older age, with roughly 50% of participants aged over 45 years  
 198 old, almost 25% were >60 years old (Table 1). The highest proportion of participants >60 years old  
 199 were observed in rural East Java (31.3%), with mean age of 51.7 years old. We measured the youngest  
 200 POSBINDU participants in rural Central Java (mean age 41.0 years old). Meanwhile, the missing  
 201 information on education level were higher (almost 60%), with even higher proportion in North  
 202 Sumatra.

203 In the span of the two years of secondary data collection, we found that, on average, the participants  
 204 visit POSBINDU twice, with the lowest average of visits in North Sumatra (rounded to 1  
 205 visit/participant). Approximately 38,628 (71.2%) of participants visit POSBINDU once for two years,  
 206 and 761 (1.4%) visits POSBINDU more than 12 times.

207 Table 2. Missing information and Risk Factors Characteristics within POSBINDU Participants  
 208 (POSBINDU Register, 2018-2019)

| Characteristics                            | North Sumatra  |                | East Java      |                | Central Java   |                | Total<br>%(SE) |
|--------------------------------------------|----------------|----------------|----------------|----------------|----------------|----------------|----------------|
|                                            | Rural<br>%(SE) | Urban<br>%(SE) | Rural<br>%(SE) | Urban<br>%(SE) | Rural<br>%(SE) | Urban<br>%(SE) |                |
| <b>Missing Information in All Visits</b>   |                |                |                |                |                |                |                |
| n                                          | 6,061          | 15,774         | 57,504         | 13,422         | 4,925          | 16,895         | 114,581        |
| Personal history (complete)                | 99.3 (0.1)     | 92.6 (0.2)     | 67.9 (0.2)     | 42.5 (0.4)     | 62.1 (0.7)     | 95.2 (0.2)     | 73.8 (0.1)     |
| Family history (complete)                  | 99.4 (0.1)     | 92.6 (0.2)     | 65.1 (0.2)     | 39.7 (0.4)     | 61.6 (0.7)     | 95.9 (0.2)     | 72.1 (0.1)     |
| Personal history (any)                     | 88.2 (0.4)     | 88.5 (0.3)     | 56.4 (0.2)     | 17.2 (0.3)     | 54.2 (0.7)     | 91.0 (0.2)     | 62.9 (0.1)     |
| Family history (any)                       | 97.5 (0.2)     | 88.9 (0.3)     | 57.3 (0.2)     | 28.9 (0.4)     | 53.5 (0.7)     | 93.8 (0.2)     | 65.7 (0.1)     |
| Height                                     | 42.7 (0.6)     | 19.0 (0.2)     | 15.6 (0.2)     | 20.7 (0.3)     | 30.6 (0.7)     | 23.3 (0.3)     | 19.9 (0.1)     |
| Weight measurement                         | 35.8 (0.6)     | 16.0 (0.2)     | 18.8 (0.2)     | 5.6 (0.2)      | 8.9 (0.4)      | 12.3 (0.3)     | 16.4 (0.1)     |
| Waist circumference                        | 49.5 (0.6)     | 36.0 (0.3)     | 15.6 (0.2)     | 12.7 (0.2)     | 36.9 (0.6)     | 63.6 (0.4)     | 27.8 (0.1)     |
| Blood pressure                             | 1.8 (0.2)      | 5.8 (0.2)      | 9.8 (0.1)      | 4.6 (0.2)      | 4.2 (0.3)      | 6.3 (0.2)      | 7.4 (0.1)      |
| Blood cholesterol                          | 87.0 (0.4)     | 80.1 (0.3)     | 81.9 (0.2)     | 97.4 (0.1)     | 91.1 (0.4)     | 82.0 (0.3)     | 84.2 (0.1)     |
| Incomplete information                     | 99.6 (0.1)     | 95.1 (0.2)     | 98.1 (0.1)     | 99.6 (0.1)     | 99.6 (0.1)     | 99.6 (0.1)     | 98.2 (0.1)     |
| <b>Missing Information in First Visits</b> |                |                |                |                |                |                |                |
| n                                          | 5,103          | 10,999         | 23,053         | 4,983          | 2,298          | 6,688          | 54,224         |
| Personal history (complete)                | 99.2 (0.1)     | 89.9 (0.3)     | 72.8 (0.3)     | 35.1 (0.7)     | 49.3 (0.9)     | 92.6 (0.3)     | 76.3 (0.2)     |
| Family history (complete)                  | 99.3 (0.1)     | 89.8 (0.3)     | 71.3 (0.3)     | 41.4 (0.7)     | 50.9 (0.9)     | 93.5 (0.3)     | 76.4 (0.2)     |
| Personal history (any)                     | 88.2 (0.5)     | 85.1 (0.3)     | 58.3 (0.3)     | 15.3 (0.5)     | 40.1 (0.8)     | 86.9 (0.4)     | 68.3 (0.2)     |
| Family history (any)                       | 97.3 (0.2)     | 85.2 (0.3)     | 60.6 (0.3)     | 30.0 (0.6)     | 40.1 (0.8)     | 90.5 (0.4)     | 65.0 (0.2)     |

|                                               |            |            |            |            |            |            |             |
|-----------------------------------------------|------------|------------|------------|------------|------------|------------|-------------|
| Height                                        | 41.8 (0.7) | 19.0 (0.4) | 14.8 (0.2) | 21.1 (0.6) | 20.4 (0.7) | 23.0 (0.5) | 20.1 (0.2)  |
| Weight                                        | 35.3 (0.3) | 15.0 (0.3) | 16.7 (0.2) | 47.6 (0.3) | 7.2 (0.4)  | 12.9 (0.4) | 15.9 (0.1)  |
| Waist circumference                           | 48.9 (0.7) | 33.6 (0.4) | 11.1 (0.2) | 12.9 (0.5) | 23.0 (0.7) | 66.1 (0.6) | 26.9 (0.2)  |
| Blood pressure                                | 1.7 (0.2)  | 5.4 (0.2)  | 4.9 (0.1)  | 5.0 (0.3)  | 3.2 (0.3)  | 7.0 (0.3)  | 4.9 (0.1)   |
| Blood cholesterol                             | 86.1 (0.5) | 75.7 (0.4) | 76.6 (0.3) | 97.9 (0.2) | 92.3 (0.4) | 79.1 (0.5) | 80.6 (0.2)  |
| Incomplete information                        | 99.6 (0.1) | 93.0 (0.2) | 96.7 (0.1) | 99.7 (0.1) | 99.4 (0.1) | 99.4 (0.1) | 97.01 (0.1) |
| <b>Risk Factors Screening in All Visits</b>   |            |            |            |            |            |            |             |
| n                                             | 3,423      | 12,015     | 45,108     | 10,484     | 3,374      | 12,750     | 87,154      |
| <b>BMI</b>                                    |            |            |            |            |            |            |             |
| Normal                                        | 48.3 (0.9) | 48.2 (0.5) | 51.3 (0.2) | 44.6 (0.5) | 52.3 (0.9) | 46.4 (0.4) | 49.3 (0.2)  |
| Underweight                                   | 4.9 (0.4)  | 4.5 (0.2)  | 8.0 (0.1)  | 4.5 (0.2)  | 9.1 (0.5)  | 3.8 (0.2)  | 6.3 (0.1)   |
| Overweight                                    | 31.9 (0.8) | 34.4 (0.4) | 30.8 (0.2) | 34.7 (0.4) | 29.1 (0.8) | 34.2 (0.4) | 32.3 (0.2)  |
| Obese                                         | 14.9 (0.6) | 12.9 (0.3) | 10.0 (0.3) | 16.3 (0.4) | 9.4 (0.5)  | 15.7 (0.3) | 12.1 (0.1)  |
| n                                             | 5,942      | 14,835     | 51,784     | 12,773     | 4,717      | 15,814     | 105,865     |
| Hypertension                                  | 35.4 (0.6) | 28.0 (0.4) | 42.5 (0.2) | 33.7 (0.4) | 25.6 (0.6) | 35.9 (0.4) | 37.2 (0.1)  |
| <b>Risk Factors Screening in First Visits</b> |            |            |            |            |            |            |             |
| n                                             | 2,925      | 8,440      | 18,820     | 3,850      | 2,678      | 5,078      | 41,791      |
| <b>BMI</b>                                    |            |            |            |            |            |            |             |
| Normal                                        | 49.3 (0.9) | 48.0 (0.5) | 51.5 (0.4) | 45.3 (0.8) | 52.4 (1.0) | 44.4 (0.7) | 49.3 (0.2)  |
| Underweight                                   | 4.8 (0.4)  | 4.5 (0.2)  | 7.7 (0.2)  | 5.1 (0.4)  | 10.1 (0.6) | 4.2 (0.3)  | 6.3 (0.1)   |
| Overweight                                    | 32.0 (0.9) | 34.2 (0.5) | 30.4 (0.3) | 33.3 (0.8) | 28.7 (0.9) | 35.1 (0.7) | 32.0 (0.2)  |
| Obese                                         | 13.9 (0.6) | 13.3 (0.4) | 10.4 (0.2) | 16.3 (0.6) | 8.8 (0.5)  | 16.3 (0.5) | 12.4 (0.2)  |
| n                                             | 5,008      | 10,379     | 21,858     | 4,725      | 3,288      | 6,201      | 51,459      |
| Hypertension                                  | 34.5 (0.7) | 28.5 (0.4) | 40.5 (0.3) | 31.6 (0.7) | 25.1 (0.8) | 37.9 (0.6) | 35.3 (0.2)  |

## Notes:

Within province, rural-urban comparisons are significant at 0.05

Between provinces comparisons are significant at 0.05

Differences in proportion tested using Chi squares

SE= standard error

We further observed the relatively high missing information for screening in POSBINDU across the districts, with the following general pattern. First, a relatively high proportion of missing information concerning the personal and family history, with East Java having the lowest proportion. Second, a relatively lower proportion of missing data on anthropometric measurements (less than 50%). Third, in all seven districts, the highest proportion of available data were for blood pressure measurements, followed by weight and height information. Last, our analysis identified higher missing values for blood cholesterol measurements (84,2%). For all measurements, there were significant differences between the three provinces, as well as between the rural and urban areas within the provinces (Table 2).

Based on available data, we found that obesity seems to be more prevalent in urban areas in Java, but relatively similar between rural and urban areas in North Sumatra. In contrast, hypertension was more prevalent in a rural area for East Java and North Sumatra but was more common in urban districts of Central Java (Table 2). However, these data should be interpreted cautiously due to the relatively high missing data on the measurements.

229 **Barriers for the screening of hypertension in POSBINDU**

230 The qualitative data supported the quantitative finding about lacking participation of male and  
 231 younger population in POSBINDU. In the FGDs, cadres and health officials stated the barriers for male  
 232 and younger participants to attend POSBINDU, including the inconvenience of POSBINDU schedule, as  
 233 well as low awareness for hypertension screening (Table 3).

234 Table 3. Qualitative analyses of Focus Group Discussion amongst POSBINDU Cadres, Primary Health  
 235 Care and Health Department Officials

| Themes                                                      | Category                                                                               | Codes                                                                            |
|-------------------------------------------------------------|----------------------------------------------------------------------------------------|----------------------------------------------------------------------------------|
| Suboptimal target population and gap in policy              | Participants' characteristics                                                          | Younger adults rarely participate                                                |
|                                                             |                                                                                        | Lack of male participants                                                        |
|                                                             | Barrier to participations                                                              | Schedule incompatibility                                                         |
|                                                             |                                                                                        | Low awareness for screening                                                      |
|                                                             |                                                                                        | Lack of role model for screening                                                 |
|                                                             | Ineffective policy and coordination                                                    | Lack of prioritization for NCD                                                   |
|                                                             |                                                                                        | Implementation gap of national policy/program at the local level                 |
|                                                             |                                                                                        | The need for coordination with different stakeholders                            |
|                                                             |                                                                                        | The need for coordination among NCD-related programs                             |
|                                                             | Lack of human resources in terms of capability and quantity for hypertension screening | Cadres have multiple tasks, with time constraints                                |
| Cadres are volunteers with other obligations                |                                                                                        |                                                                                  |
| Cadres' competencies                                        |                                                                                        | Lack of knowledge on hypertension and other NCD                                  |
|                                                             |                                                                                        | Lack of ability to conduct measurements and provide health education             |
|                                                             |                                                                                        | Lack of ability to conduct recording and reporting                               |
| Lack of NCD program officers for supervision and reporting  |                                                                                        | Lack of NCD program officers at PHC                                              |
|                                                             |                                                                                        | Most program officers are responsible for multiple tasks/programs                |
|                                                             |                                                                                        | Lack of reporting officers                                                       |
| Provision of Referral Counselling                           |                                                                                        | The participant with hypertension is not always referred to PHC                  |
|                                                             |                                                                                        | Lack of counseling to participants before the referral made                      |
|                                                             |                                                                                        | POSBINDU has referral form, but rarely used                                      |
|                                                             |                                                                                        | Treatment for the referral is covered by their health insurance                  |
| Lack of resources for hypertension screening and prevention |                                                                                        | Equipment for hypertension screening                                             |
|                                                             | Equipment maintenance is inadequate                                                    |                                                                                  |
|                                                             | Limited logistics for cholesterol measurement                                          |                                                                                  |
|                                                             | Lack of budget                                                                         | POSBINDU is funded by the government, stakeholder (private sectors) or community |
|                                                             |                                                                                        | Lack of budget for POSBINDU activities                                           |

|                                                           |                                                  |                                                       |
|-----------------------------------------------------------|--------------------------------------------------|-------------------------------------------------------|
|                                                           |                                                  | Lack of budget for cadres training and incentives     |
|                                                           | Health education material                        | Lack of health education materials                    |
|                                                           | Infrastructure for recording and reporting       | Not all cadres have laptops                           |
|                                                           |                                                  | Limited internet connection in some areas             |
|                                                           |                                                  | Most POSBINDU stations use manual reporting           |
| Time constraints for implementation based on MOH standard | The complexity of activities and time limitation | The time required for examination is too long         |
|                                                           |                                                  | Too many information needs to be asked and filled out |
|                                                           |                                                  | The referral form is rarely used                      |
|                                                           | The complexity of reporting forms                | Many forms need to be filled, while time is limited   |
|                                                           |                                                  | A simplified form in checklist format is preferred    |

236

237 The need for role model from community leader to improve participation and the barrier for  
238 participation, particularly among males is highlighted by these quotes:

239 *"Yes, we don't have a lot of men (participants), because they are working "* (Cadre, FGD#21)

240 *"In our POSBINDU, the awareness for early screening is still low. Only several people come (to*  
241 *POSBINDU), younger people don't want to come because (POSBINDU is conducted) during*  
242 *working days"*(Cadre, FGD#3)

243 *"...Socialization for this (POSBINDU) is needed, often, the community leader in our area don't*  
244 *want to participate because they are afraid to be screened"* (Cadre, FGD#2)

245 *"... when I asked the communities, why they did not come to POSBINDU, or why there were only*  
246 *few people, they said because I (the community member) were not sick, so why do I need to get*  
247 *(health) check-up (?). So, they were not aware that POSBINDU is not only for those who are sick"*  
248 *(Health official, FGD#19)*

249 *"I asked POSBINDU (participant), why elderly? Where are the younger population? And they*  
250 *said that the young stayed at home because they were embarrassed if they have diseases...*  
251 *"(Health official, FGD#16)*

252 Lack of priority and overlap of NCD-related programs also contribute to a suboptimal target population  
253 of POSBINDU, as illustrated by the following quote:

254 *"(NCD) is not a priority program, hence, there's a lack of commitment between the superior*  
255 *(health department) with the program officials, for example."* (Health official, FGD#7)

256 *"... (different department in) the Ministry of Health focus on specific diseases, such as diabetes*  
257 *and cancer... However, in the community, (the programs) become general. (We) run Polindes,*  
258 *(Posyandu) Lansia, POSBINDU, School Health Program (Types of community based public*  
259 *health programs in Indonesia). In my opinion, the regulation is rigid and detailed, but the*  
260 *implementation is mixed (overlap). If we want to give optimum results, it takes efforts."*  
261 *(Health official, FGD#10).*

262 Several barriers for implementation were revealed. The cadres and health officers often have to run  
263 several different programs. The FGDs also revealed a lack of capability of cadres to conduct  
264 measurements for hypertension screening, providing health education, and also conducting the

1  
2  
3 265 recording and reporting of the POSBINDU activities and measurements. The informants also  
4 266 mentioned a lack of resources, including budget, equipment, and logistics to conduct all the  
5 267 measurements.

7 268 *"One person can hold 5 positions in PHC activities... POSBINDU cadres, Posyandu Lansia cadres,*  
8 269 *and other programs. "(Cadre, FGD#11)*

10 270 *"(cadres of) POSBINDU do not have laptop nor cell phone for the reporting application (of*  
11 271 *POSBINDU), hence, we report to PHC manually" (Cadre, FGD#14)*

13  
14 272 The barriers also include the complexities of the activities and measurements, as well as extensive  
15 273 reporting forms, which require a long time to be completed.

16  
17 274 *"...it takes a long time, because of the measurements and stages (of POSBINDU activities) "* (PHC  
18 275 *officer, FGD#8)*

19  
20 276 *"...POSBINDU report is too time-consuming, because it is long (detail), including identity, cell*  
21 277 *phone number, address, and others... and it has to be filled out every month."* (PHC officer,  
22 278 *FGD#6)*

23  
24 279 Interestingly, in several districts, we found the implementation of mobile POSBINDU, moving from  
25 280 one community to the other within the same subdistricts.

27 281 *"Our POSBINDU is mobile, we have ten communities, so every week, we move from one*  
28 282 *community to the next, focusing on people 15-59 years old."* (Cadre, FGD#18)

30 283 We further synthesized the quantitative and qualitative results. We categorised the barriers into three  
31 284 main parts: 1) input, reflecting the target population/coverage of POSBINDU, 2) process, describing  
32 285 the implementation of POSBINDU activities, and 3) output, reflecting the recording and reporting  
33 286 process of POSBINDU (Figure 2). Results show that in both approaches we found lacking participation  
34 287 of male and younger people in POSBINDU. Lack of priority for NCD screening and ineffective  
35 288 coordination among stakeholders, combined with lack of awareness and access might attribute to this  
36 289 finding. The high missed opportunity, particularly in history taking and measurements, were likely due  
37 290 to the complexity of the activities/measurements, as well as lack of resources. The high missing data  
38 291 also stem from the complexity of the forms and lack of capability for online reporting.

40 291  
41  
42 292 Insert Figure 2 here

#### 43 44 293 **Discussion**

45 294 In this study, we revealed missed opportunities in input, activities, and output of POSBINDU  
46 295 implementation in screening for hypertension and its risk factors. Several contextual barriers were  
47 296 identified. The suboptimal coverage was possibly due to lack of priority for NCD screening, lack of  
48 297 awareness and access, and overlap of NCD-related program. The suboptimal activities and reporting  
49 298 were likely caused by a lack of resources, as well as limited time to perform the complexities of  
50 299 activities and reporting according to MOH guideline.

53 300 The missed opportunity to screen male and younger population that we found in this study is  
54 301 particularly concerning. Although the prevalence is lower than of the older population, hypertension  
55 302 prevalence among young Indonesian is still relatively high (28%).[26] While the target population of  
56 303 POSBINDU is listed as those 15 years or older, the elderly are usually targeted in Posyandu Lansia, a  
57 304 community-based screening and management for the elderly population.[27] Awareness is also lower  
58 305 in male and younger adults, signaling the need to screen this population.[3] Ideally, POSBINDU

1  
2  
3 306 becomes the “gatekeeper” for screening in the community. Hypertensive and diabetic patients were  
4 307 then referred to PHC and joined Prolanis, a community-based activity funded by the health insurance  
5 308 program, for management of chronic diseases patients.[12]

7 309 Furthermore, with a lack of male participation, POSBINDU is missing one of the key target populations  
8 310 for risk factors screening: smokers. Analysis of a national survey in 2014 reported 32% prevalence of  
9 311 smoking, with approximately 40% of males aged 15-55 years old and 14% of male adolescents are  
10 312 current smokers.[28–30] Further, 20% of Indonesia’s total chronic diseases are attributed to smoking,  
11 313 with hypertension as the highest proportion.[31] Screening for hypertension and its risk factors  
12 314 earlier, combined with lifestyle-based interventions effectively avoid future complications.[32,33]

15 315 We also revealed the need to prioritise and reorganise the current NCD-related programs, to address  
16 316 the suboptimal coverage and the overlap. An example of the gap between the national  
17 317 recommendation and local implementation is reflected in the coordination of existing NCD-related  
18 318 programs: POSBINDU, Posyandu Lansia, and PANDU PTM. In the MOH, the PANDU PTM (Pelayanan  
19 319 Terpadu Penyakit Tidak Menular, Integrated Health Services for NCDs) and POSBINDU are regulated  
20 320 under the Directorate for Disease Management, while Posyandu Lansia is under the Directorate of  
21 321 Public Health. Despite the different directorates, the implementation at community level is often  
22 322 conducted simultaneously and often overlap. Reporting, however, is conducted separately. Hence, as  
23 323 previous studies have noted, we also recommend the need of comprehensive and coordinated NCDs  
24 324 prevention program in Indonesia.[34–36]

28 325 The relatively high missed opportunity in screening for hypertension risk factors, as well as  
29 326 sociodemographic characteristics found in this study, portrays suboptimal implementation of  
30 327 POSBINDU. This can be caused by a lack of recording and reporting (monitoring and evaluation fidelity)  
31 328 or lack of measurement (implementation fidelity). In our further elaboration during the FGDs, we  
32 329 found that lack of human resources might contribute to the suboptimal implementation of POSBINDU.  
33 330 Our findings revealed the need to train cadres to improve their skills and efficiency in conducting the  
34 331 measurements and history taking, as well as reporting the measurements. This is in line with findings  
35 332 from Meinema et al (2017 and Abdell-All et al (2018)[37,38]. Our findings also imply the complexities  
36 333 of the activities and reporting of POSBINDU which lead to ineffective implementation. It is important  
37 334 to ensure that valuable screening information can be recorded and followed up, for better  
38 335 intervention. A simplified screening program with integrated reporting is needed.

42 336 In this study, we also discovered lack of financial resources and equipment as barriers to POSBINDU  
43 337 implementation. The integration of POSBINDU and PANDU PTM to the national health insurance  
44 338 scheme might be important to ensure the sustainability of funding for the program. Integration of  
45 339 POSBINDU into the national health insurance can also improve participation of the working  
46 340 population, most of whom are covered by the national health insurance.[39] Previous studies have  
47 341 reported an increase in uptake of service by health insurance membership.[40–42]

50 342 Based on our findings, we identified two main areas that needs to be improved: coverage and  
51 343 implementation of POSBINDU. To improve coverage of POSBINDU, there are two important steps that  
52 344 we recommend. First, an integrated approach with collaboration amongst different programs and  
53 345 directorates to reduce the overlap and simplify the POSBINDU implementation at the PHC and  
54 346 community level. PANDU PTM as the adaptation of WHO PEN,[43] needs to be implemented in a  
55 347 wider scale. Second, redirecting the target population of hypertension screening, to cover also  
56 348 younger and male population. A workplace-based screening program which can address the barriers  
57 349 identified in the qualitative findings is recommended.[44,45] For this younger population, the use of  
58 350 mobile technology for monitoring of risk factors and measurement might be effective. Previous



1  
2  
3 351 studies have reported the effectiveness of mobile health for hypertension screening and risk  
4 352 stratification.[46,47]  
5

6 353 To improve the implementation and components of POSBINDU activities, a simplified algorithm to  
7 354 screen and refer the target population is needed. The algorithm needs to be developed both in the  
8 355 electronic format and manual format to address the different capabilities of community cadres and  
9 356 resources in the community. Simplifying the program and reporting systems will also reduce the  
10 357 workload of PHC and district health officials. Further, a clear algorithm for the referral of “screened”  
11 358 cases to PHC is important. The readiness of the PHCs also needs to be improved to adequately manage  
12 359 the potential surge in referred cases. Lastly, there is a need to integrate hypertension and CVD  
13 360 screening program into the national health insurance system. Hence, ensuring the sustainability of  
14 361 funding and resources of the program. With these approaches, comprehensive screening for  
15 362 hypertension and CVD along the continuum of care might be more effective.  
16  
17  
18

19 363 This study has several limitations. First, the proportion of our measures are not reflective for the whole  
20 364 target population of POSBINDU, since the participants were mostly female and of older age. The  
21 365 characteristics of our sample, which are generally older with a higher proportion of females, drive the  
22 366 proportion of risk factors higher than that of the general population in Indonesia. However, this study  
23 367 reflects the current participants of POSBINDU. Second, we used a secondary data collection by  
24 368 POSBINDU cadres, the high number of missing data that we presented in this study, probably stem  
25 369 from two main sources: omissions in reporting or a true lack in measurement/activities. Nevertheless,  
26 370 both the activities and reporting are important in NCDs screening, particularly in the follow-up. The  
27 371 secondary data also prone to measurement bias, particularly, with the variations in POSBINDU  
28 372 measurements by cadres. The Ministry of Health provided guidelines in the measurement for  
29 373 hypertension in POSBINDU, however, the implementation might vary. The high missing information  
30 374 on several sociodemographic characteristics i.e., occupation and education, also limit our ability to  
31 375 conduct multivariable analyses. Another limitation of this study is we have not included the  
32 376 perspective of POSBINDU participants in the FGDs. Instead, we considered the POSBINDU cadres to  
33 377 represents the voice of both the implementers as well as users. However, we include the perspective  
34 378 of the POSBINDU participants as users in the baseline of our prospective data collection (ongoing).  
35 379 The users’ perspective can provide further insights into barriers and facilitators of POSBINDU  
36 380 implementation.  
37  
38  
39  
40

41 381 Despite the limitation, there are several strengths of the study: First, to our knowledge, this was the  
42 382 first relatively large evaluation of POSBINDU. Second, the use of a mixed-methods study design, and  
43 383 therefore, providing more comprehensive information on POSBINDU implementation. Third, the  
44 384 study also investigates the contextual factors that should be addressed in the improvement of the  
45 385 community-based hypertension screening program in Indonesia. This study might provide insights into  
46 386 POSBINDU implementation in other areas in Indonesia and can be the basis for further  
47 387 recommendation to improve POSBINDU implementation.  
48  
49  
50

## 51 388 **Conclusion**

52 389 This study showed the suboptimal implementation of POSBINDU activities. Particularly, the missed  
53 390 opportunity in screening for hypertension risk factors in Indonesia. The barriers include a lack priority  
54 391 for NCDs, lack of awareness and access for subpopulation, and several implementation barriers:  
55 392 capability, resources, and protocols. An innovative approach to simplify and improve the capacity of  
56 393 POSBINDU is in preparation to optimize the screening and linkage to hypertension care in Indonesia.  
57 394 This study provides evidence-based recommendations in improving the current implementation of  
58 395 POSBINDU, in the Indonesian context.  
59  
60

### 396 **Data Statement**

397 The de-identified data from this study is available upon request to the corresponding or first author  
398 pending thorough review of request and adherence to the Indonesian government regulation on  
399 data sharing.

### 400 **Author Contributions**

401 VW, AP, RFP, EP, YM, JK and JLD contributed to the design of the study. VW, A, RFP, EP, YM, B, and S  
402 participate actively in study implementation, including in data collection. VW, YM, S, and RFP analyzed  
403 the quantitative data. AP, EP, and B analyzed the qualitative data. VW, AP, RFP, S, and YM draft the  
404 manuscript with all co-authors revised critically. All authors read and approved the final manuscript.

### 405 **Funding**

406 This work was supported by the Horizon 2020 research program of the European Union. This study  
407 was co-financed by the Horizon 2020 research program of the European Union, under grant 825026  
408 Scaling Up NCDs interventions in Southeast Asia.

### 409 **Conflict of Interest**

410 None declared

### 411 **License**

412 The Corresponding Author has the right to grant on behalf of all authors and does grant on behalf of  
413 all authors, an exclusive licence (or non exclusive for government employees) on a worldwide basis  
414 to the BMJ Publishing Group Ltd ("BMJ"), and its Licensees to permit this article (if accepted) to be  
415 published in The BMJ's editions and any other BMJ products and to exploit all subsidiary rights, as  
416 set out in our licence.

### 417 **Acknowledgment**

418 We thank SUNISEA project consortium and the district health departments, primary health care staffs  
419 and cadres of POSBINDU in the three provinces, who have contributed to this study.

420 Figure 1. Study Sample Selection

421 Figure 2. Synthesis of the Quantitative and Qualitative Findings

### 422 **References**

- 423 1 Basu S, Millett C. Social epidemiology of hypertension in middle-income countries:  
424 Determinants of prevalence, diagnosis, treatment, and control in the WHO SAGE study.  
425 *Hypertension* 2013;**62**:18–26. doi:10.1161/HYPERTENSIONAHA.113.01374
- 426 2 Mills KT, Bundy JD, Kelly TN, *et al*. Global disparities of hypertension prevalence and control.  
427 *Circulation* 2016;**134**:441–50. doi:10.1161/CIRCULATIONAHA.115.018912
- 428 3 Hussain MA, Al Mamun A, Reid C, *et al*. Prevalence, awareness, treatment and control of  
429 hypertension in Indonesian adults aged ≥40 years: Findings from the Indonesia Family Life  
430 Survey (IFLS). *PLoS One* 2016;**11**:1–16. doi:10.1371/journal.pone.0160922
- 431 4 Peltzer K, Pengpid S. The Prevalence and Social Determinants of Hypertension among Adults  
432 in Indonesia: A Cross-Sectional Population-Based National Survey. *Int J Hypertens* 2018;**2018**.  
433 doi:10.1155/2018/5610725
- 434 5 Purnamasari D. The Emergence of Non-communicable Disease in Indonesia. *Acta Med*  
435 *Indones* 2018;**50**:273–4. <http://www.ncbi.nlm.nih.gov/pubmed/30630990>
- 436 6 Vos T, Abajobir AA, Abbafati C, *et al*. Global, regional, and national incidence, prevalence, and

- 1  
2  
3 437 years lived with disability for 328 diseases and injuries for 195 countries, 1990-2016: A  
4 438 systematic analysis for the Global Burden of Disease Study 2016. *Lancet* 2017;**390**:1211–59.  
5 439 doi:10.1016/S0140-6736(17)32154-2  
6
- 7 440 7 Gaziano T. Prevention and treatment of chronic diseases in developing countries. 2011;:1–  
8 441 20.<http://www.un.org/esa/population/publications/expertpapers/2011-2-gaziano.pdf>  
9
- 10 442 8 Allen L, Williams J, Townsend N, *et al.* Socioeconomic status and non-communicable disease  
11 443 behavioural risk factors in low-income and lower-middle-income countries: a systematic  
12 444 review. *Lancet Glob Heal* 2017;**5**:e277–89. doi:10.1016/S2214-109X(17)30058-X  
13
- 14 445 9 Rosengren A, Smyth A, Rangarajan S, *et al.* Socioeconomic status and risk of cardiovascular  
15 446 disease in 20 low-income, middle-income, and high-income countries: the Prospective Urban  
16 447 Rural Epidemiologic (PURE) study. *Lancet Glob Heal* 2019;**7**:e748–60. doi:10.1016/S2214-  
17 448 109X(19)30045-2  
18
- 19 449 10 WHO. Package of Essential Noncommunicable (PEN) Disease Interventions for Primary Health  
20 450 Care. *Geneva World Heal Organ* 2010;:1–66.papers2://publication/uuid/FC98856B-4122-  
21 451 4325-826F-20FA6B89DEBD  
22
- 23 452 11 Ferdianto A, Tamtomo DG, Sulaeman ES. Does the Integrated Health Post have Contextual  
24 453 Effect on Tertiary Preventive Behavior among Hypertensive Patients? A Multilevel Analysis  
25 454 Evidence from Surakarta. *J Heal Promot Behav* 2019;**4**:224–34.  
26 455 doi:10.26911/thejhp.2019.04.03.07  
27
- 28 456 12 Khoe LC, Wangge G, Soewondo P, *et al.* The implementation of community-based diabetes  
29 457 and hypertension management care program in Indonesia. *PLoS One* 2020;**15**:1–9.  
30 458 doi:10.1371/journal.pone.0227806  
31
- 32 459 13 Yamada M, Hapsari ED, Matsuo H. Behaviors toward noncommunicable diseases prevention  
33 460 and their relationship with physical health status among community-dwelling, middleaged  
34 461 and older women in Indonesia. *Int J Environ Res Public Health* 2020;**17**.  
35 462 doi:10.3390/ijerph17072332  
36
- 37 463 14 Maharani A, Sujarwoto, Praveen D, *et al.* Cardiovascular disease risk factor prevalence and  
38 464 estimated 10-year cardiovascular risk scores in Indonesia: The SMARThealth Extend study.  
39 465 *PLoS One* 2019;**14**:1–13. doi:10.1371/journal.pone.0215219  
40
- 41 466 15 Turana Y, Teng kawan J, Soenarta AA. Asian management of hypertension: Current status,  
42 467 home blood pressure, and specific concerns in Indonesia. *J Clin Hypertens* 2020;**22**:483–5.  
43 468 doi:10.1111/jch.13681  
44
- 45 469 16 Scheltens T, Bots ML, Numans ME, *et al.* Awareness, treatment and control of hypertension:  
46 470 The ‘rule of halves’ in an era of risk-based treatment of hypertension. *J Hum Hypertens*  
47 471 2007;**21**:99–106. doi:10.1038/sj.jhh.1002123  
48
- 49 472 17 Chen R, Tunstall-Pedoe H, Morrison C, *et al.* Trends and social factors in blood pressure  
50 473 control in Scottish MONICA surveys 1986-1995: The rule of halves revisited. *J Hum Hypertens*  
51 474 2003;**17**:751–9. doi:10.1038/sj.jhh.1001612  
52
- 53 475 18 Alfiah A, Pujiyanto P. an Analysis on the Implementation of the Integrated Guidance Post  
54 476 (Posbindu) Activities for Non-Communicable Diseases At Bogor City in 2018. *J Indones Heal*  
55 477 *Policy Adm* 2019;**4**:11–5. doi:10.7454/ihpa.v4i1.2388  
56
- 57 478 19 Ministry of Health (MOH) - Kementerian Kesehatan. Petunjuk Teknis Pos Pembinaan Terpadu  
58 479 Penyakit Tidak Menular (Posbindu PTM). 2012.  
59 480 <http://p2ptm.kemkes.go.id/uploads/2016/10/Petunjuk-Teknis-Pos-Pembinaan-Terpadu->  
60

- 1  
2  
3 481 Penyakit-Tidak-Menular-POSBINDU-PTM-2013.pdf  
4  
5 482 20 Moeloek NF. Indonesia national health policy in the transition of disease burden and health  
6 483 insurance coverage. *Med J Indones* 2017;**26**:3–6. doi:10.13181/mji.v26i1.1975  
7  
8 484 21 Ministry of Health (MOH) - Kementerian Kesehatan. Riskesdas Main Results 2018. 2018.  
9 485 <https://www.litbang.kemkes.go.id/hasil-utama-riskesdas-2018/>  
10  
11 486 22 Smith JD, Li DH, Rafferty MR. The implementation research logic model: A method for  
12 487 planning, executing, reporting, and synthesizing implementation projects. *medRxiv* 2020;:1–  
13 488 12. doi:10.1101/2020.04.05.20054379  
14  
15 489 23 Sharma S, Adetoro OO, Vidler M, *et al.* A process evaluation plan for assessing a complex  
16 490 community-based maternal health intervention in Ogun State, Nigeria. *BMC Health Serv Res*  
17 491 2017;**17**:1–10. doi:10.1186/s12913-017-2124-4  
18  
19 492 24 Wong ST, Yin D, Bhattacharyya O, *et al.* Developing a performance measurement framework  
20 493 and indicators for community health service facilities in urban China. *BMC Fam Pract*  
21 494 2010;**11**. doi:10.1186/1471-2296-11-91  
22  
23 495 25 Feters MD, Curry LA, Creswell JW. Achieving integration in mixed methods designs -  
24 496 Principles and practices. *Health Serv Res* 2013;**48**:2134–56. doi:10.1111/1475-6773.12117  
25  
26 497 26 Sudharsanan N, Geldsetzer P. Impact of coming demographic changes on the number of  
27 498 adults in need of care for hypertension in Brazil, China, India, Indonesia, Mexico, and South  
28 499 Africa: A modeling study. *Hypertension* 2019;**73**:770–6.  
29 500 doi:10.1161/HYPERTENSIONAHA.118.12337  
30  
31 501 27 Rahmawati R, Bajorek B V. Access to medicines for hypertension: A survey in rural Yogyakarta  
32 502 province, Indonesia. *Rural Remote Health* 2018;**18**. doi:10.22605/RRH4393  
33  
34 503 28 Amalia B, Cadogan SL, Prabandari YS, *et al.* Socio-demographic inequalities in cigarette  
35 504 smoking in Indonesia, 2007 to 2014. *Prev Med (Baltim)* 2019;**123**:27–33.  
36 505 doi:10.1016/j.ypmed.2019.02.025  
37  
38 506 29 Sujarwoto S. Sleep Disturbance in Indonesia: How Much Does Smoking Contribute? *Behav*  
39 507 *Sleep Med* 2019;**00**:1–14. doi:10.1080/15402002.2019.1682584  
40  
41 508 30 Kusumawardani N, Tarigan I, Suparmi, *et al.* Socio-economic, demographic and geographic  
42 509 correlates of cigarette smoking among Indonesian adolescents: results from the 2013  
43 510 Indonesian Basic Health Research (RISKESDAS) survey. *Glob Health Action* 2018;**11**.  
44 511 doi:10.1080/16549716.2018.1467605  
45  
46 512 31 Kristina SA, Endarti D, Wiedyaningsih C, *et al.* Health Care Cost of Noncommunicable Diseases  
47 513 Related to Smoking in Indonesia, 2015. *Asia-Pacific J Public Heal* 2018;**30**:29–35.  
48 514 doi:10.1177/1010539517751311  
49  
50 515 32 Saif-Ur-Rahman KM, Hasan M, Hossain S, *et al.* Non-pharmacological interventions for the  
51 516 prevention of hypertension in low-income and middle-income countries: Protocol for a  
52 517 systematic review and meta-analysis. *BMJ Open* 2018;**8**:6–11. doi:10.1136/bmjopen-2017-  
53 518 020724  
54  
55 519 33 Pantell MS, Prather AA, Downing JM, *et al.* Association of Social and Behavioral Risk Factors  
56 520 With Earlier Onset of Adult Hypertension and Diabetes. *JAMA Netw open* 2019;**2**:e193933.  
57 521 doi:10.1001/jamanetworkopen.2019.3933  
58  
59 522 34 Kusuma D, Kusumawardani N, Ahsan A, *et al.* On the verge of a chronic disease epidemic:  
60 523 Comprehensive policies and actions are needed in Indonesia. *Int Health* 2019;**11**:422–4.

- 1  
2  
3 524 doi:10.1093/inthealth/ihz025  
4  
5 525 35 Mboi N, Murty Surbakti I, Trihandini I, *et al.* On the road to universal health care in Indonesia,  
6 526 1990–2016: a systematic analysis for the Global Burden of Disease Study 2016. *Lancet*  
7 527 2018;**392**:581–91. doi:10.1016/S0140-6736(18)30595-6  
8  
9 528 36 Jayanna K, Swaroop N, Kar A, *et al.* Designing a comprehensive Non-Communicable Diseases  
10 529 (NCD) programme for hypertension and diabetes at primary health care level: Evidence and  
11 530 experience from urban Karnataka, South India. *BMC Public Health* 2019;**19**:1–12.  
12 531 doi:10.1186/s12889-019-6735-z  
13  
14 532 37 Meinema JG, Haafkens JA, Jaarsma DADC, *et al.* Development and evaluation of a culturally  
15 533 appropriate hypertension education (CAHE) training program for health care providers. *PLoS*  
16 534 *One* 2017;**12**:1–13. doi:10.1371/journal.pone.0178468  
17  
18 535 38 Abdel-All M, Thrift AG, Riddell M, *et al.* Evaluation of a training program of hypertension for  
19 536 accredited social health activists (ASHA) in rural India. *BMC Health Serv Res* 2018;**18**:1–11.  
20 537 doi:10.1186/s12913-018-3140-8  
21  
22 538 39 Ng JYS, Ramadani RV, Hendrawan D, *et al.* National Health Insurance Databases in Indonesia,  
23 539 Vietnam and the Philippines. *PharmacoEconomics - Open* 2019;**3**:517–26.  
24 540 doi:10.1007/s41669-019-0127-2  
25  
26 541 40 Erlangga D, Ali S, Bloor K. The impact of public health insurance on healthcare utilisation in  
27 542 Indonesia: evidence from panel data. *Int J Public Health* 2019;**64**:603–13.  
28 543 doi:10.1007/s00038-019-01215-2  
29  
30 544 41 Sharma M, Teerawattananon Y, Luz A, *et al.* Institutionalizing Evidence-Informed Priority  
31 545 Setting for Universal Health Coverage: Lessons From Indonesia. *Inq (United States)* 2020;**57**.  
32 546 doi:10.1177/0046958020924920  
33  
34 547 42 Vidyattama Y, Miranti R, Resosudarmo BP. The Role of Health Insurance Membership in  
35 548 Health Service Utilisation in Indonesia. *Bull Indones Econ Stud* 2014;**50**:393–413.  
36 549 doi:10.1080/00074918.2014.980380  
37  
38 550 43 Ministry of Health (MOH) - Kementerian Kesehatan. Pandu PTM A Community on  
39 551 intervention model and control's of NCD's. 2017.  
40  
41 552 44 Wang Z, Wang X, Shen Y, *et al.* Effect of a Workplace-Based Multicomponent Intervention on  
42 553 Hypertension Control: A Randomized Clinical Trial. *JAMA Cardiol* 2020;**5**:567–75.  
43 554 doi:10.1001/jamacardio.2019.6161  
44  
45 555 45 Reif J, Chan D, Jones D, *et al.* Effects of a Workplace Wellness Program on Employee Health,  
46 556 Health Beliefs, and Medical Use: A Randomized Clinical Trial. *JAMA Intern Med*  
47 557 2020;**180**:952–60. doi:10.1001/jamainternmed.2020.1321  
48  
49 558 46 Patel A, Praveen D, Maharani A, *et al.* Association of Multifaceted Mobile Technology-  
50 559 Enabled Primary Care Intervention with Cardiovascular Disease Risk Management in Rural  
51 560 Indonesia. *JAMA Cardiol* 2019;**4**:978–86. doi:10.1001/jamacardio.2019.2974  
52  
53 561 47 Persell SD, Peprah YA, Lipiszko D, *et al.* Effect of Home Blood Pressure Monitoring via a  
54 562 Smartphone Hypertension Coaching Application or Tracking Application on Adults With  
55 563 Uncontrolled Hypertension: A Randomized Clinical Trial. *JAMA Netw open* 2020;**3**:e200255.  
56 564 doi:10.1001/jamanetworkopen.2020.0255  
57  
58 565  
59  
60

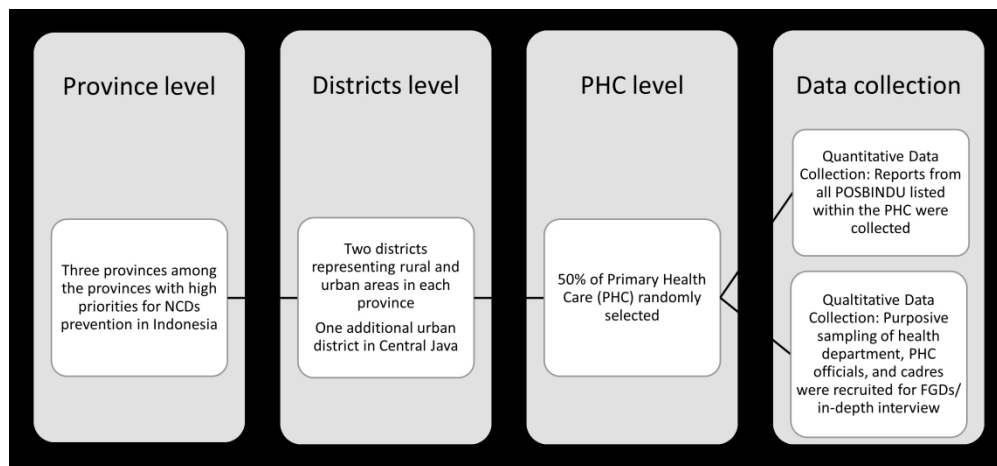

Figure 1. Study Sample Selection

258x119mm (330 x 330 DPI)

1  
2  
3  
4  
5  
6  
7  
8  
9  
10  
11  
12  
13  
14  
15  
16  
17  
18  
19  
20  
21  
22  
23  
24  
25  
26  
27  
28  
29  
30  
31  
32  
33  
34  
35  
36  
37  
38  
39  
40  
41  
42  
43  
44  
45  
46  
47  
48  
49  
50  
51  
52  
53  
54  
55  
56  
57  
58  
59  
60

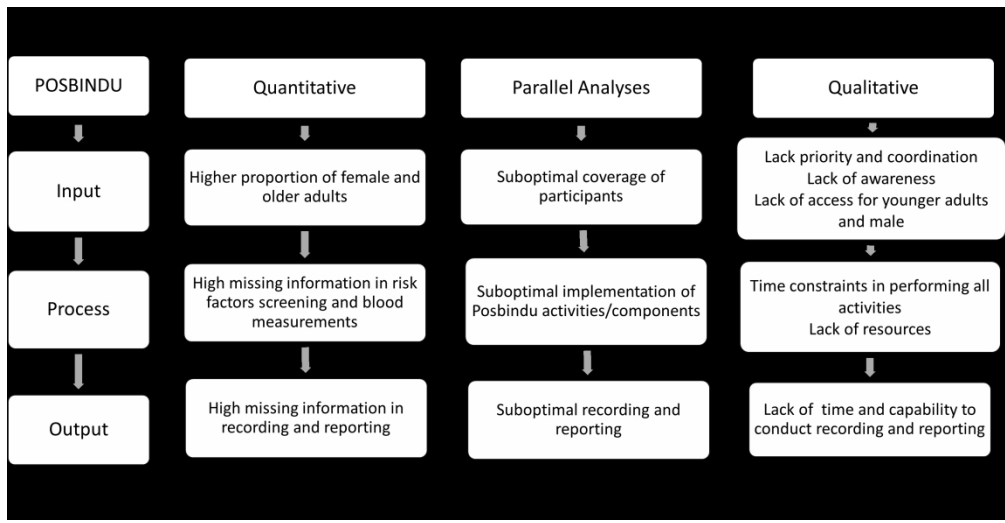

Figure 2. Synthesis of the Quantitative and Qualitative Findings

240x123mm (330 x 330 DPI)

STROBE Statement—Checklist of items that should be included in reports of *cross-sectional studies*

|                              | Item No | Recommendation                                                                                                                                                                                    | Page No                         |
|------------------------------|---------|---------------------------------------------------------------------------------------------------------------------------------------------------------------------------------------------------|---------------------------------|
| <b>Title and abstract</b>    | 1       | (a) Indicate the study's design with a commonly used term in the title or the abstract                                                                                                            | Page 1                          |
|                              |         | (b) Provide in the abstract an informative and balanced summary of what was done and what was found                                                                                               | Page 1                          |
| <b>Introduction</b>          |         |                                                                                                                                                                                                   |                                 |
| Background/rationale         | 2       | Explain the scientific background and rationale for the investigation being reported                                                                                                              | Page 2                          |
| Objectives                   | 3       | State specific objectives, including any prespecified hypotheses                                                                                                                                  | Page 2-3                        |
| <b>Methods</b>               |         |                                                                                                                                                                                                   |                                 |
| Study design                 | 4       | Present key elements of study design early in the paper                                                                                                                                           | Page 3                          |
| Setting                      | 5       | Describe the setting, locations, and relevant dates, including periods of recruitment, exposure, follow-up, and data collection                                                                   | Page 3                          |
| Participants                 | 6       | (a) Give the eligibility criteria, and the sources and methods of selection of participants                                                                                                       | Page 3                          |
| Variables                    | 7       | Clearly define all outcomes, exposures, predictors, potential confounders, and effect modifiers. Give diagnostic criteria, if applicable                                                          | Page 4                          |
| Data sources/<br>measurement | 8*      | For each variable of interest, give sources of data and details of methods of assessment (measurement). Describe comparability of assessment methods if there is more than one group              | Page 4                          |
| Bias                         | 9       | Describe any efforts to address potential sources of bias                                                                                                                                         | N/A,<br>descriptive<br>analyses |
| Study size                   | 10      | Explain how the study size was arrived at                                                                                                                                                         | Page 3                          |
| Quantitative variables       | 11      | Explain how quantitative variables were handled in the analyses. If applicable, describe which groupings were chosen and why                                                                      | Page 4                          |
| Statistical methods          | 12      | (a) Describe all statistical methods, including those used to control for confounding                                                                                                             | Page 4                          |
|                              |         | (b) Describe any methods used to examine subgroups and interactions                                                                                                                               | Page 4                          |
|                              |         | (c) Explain how missing data were addressed                                                                                                                                                       | Page 4                          |
|                              |         | (d) If applicable, describe analytical methods taking account of sampling strategy                                                                                                                | N/A                             |
|                              |         | (e) Describe any sensitivity analyses                                                                                                                                                             | N/A                             |
| <b>Results</b>               |         |                                                                                                                                                                                                   |                                 |
| Participants                 | 13*     | (a) Report numbers of individuals at each stage of study—eg numbers potentially eligible, examined for eligibility, confirmed eligible, included in the study, completing follow-up, and analysed | Page 4                          |
|                              |         | (b) Give reasons for non-participation at each stage                                                                                                                                              | N/A                             |
|                              |         | (c) Consider use of a flow diagram                                                                                                                                                                | Page 4<br>(referred)            |
| Descriptive data             | 14*     | (a) Give characteristics of study participants (eg demographic, clinical, social) and information on exposures and potential confounders                                                          | Page 5                          |
|                              |         | (b) Indicate number of participants with missing data for each variable of interest                                                                                                               | Page 6                          |



|                          |     |                                                                                                                                                                                                              |                           |
|--------------------------|-----|--------------------------------------------------------------------------------------------------------------------------------------------------------------------------------------------------------------|---------------------------|
| Outcome data             | 15* | Report numbers of outcome events or summary measures                                                                                                                                                         | Page 6                    |
| Main results             | 16  | (a) Give unadjusted estimates and, if applicable, confounder-adjusted estimates and their precision (eg, 95% confidence interval). Make clear which confounders were adjusted for and why they were included | N/A, descriptive analyses |
|                          |     | (b) Report category boundaries when continuous variables were categorized                                                                                                                                    | Page 5-6                  |
|                          |     | (c) If relevant, consider translating estimates of relative risk into absolute risk for a meaningful time period                                                                                             | N/A                       |
| Other analyses           | 17  | Report other analyses done—eg analyses of subgroups and interactions, and sensitivity analyses                                                                                                               | N/A                       |
| <b>Discussion</b>        |     |                                                                                                                                                                                                              |                           |
| Key results              | 18  | Summarise key results with reference to study objectives                                                                                                                                                     | Page 10                   |
| Limitations              | 19  | Discuss limitations of the study, taking into account sources of potential bias or imprecision. Discuss both direction and magnitude of any potential bias                                                   | Page 11                   |
| Interpretation           | 20  | Give a cautious overall interpretation of results considering objectives, limitations, multiplicity of analyses, results from similar studies, and other relevant evidence                                   | Page 11                   |
| Generalisability         | 21  | Discuss the generalisability (external validity) of the study results                                                                                                                                        | Page 12                   |
| <b>Other information</b> |     |                                                                                                                                                                                                              |                           |
| Funding                  | 22  | Give the source of funding and the role of the funders for the present study and, if applicable, for the original study on which the present article is based                                                | Page 12                   |

\*Give information separately for exposed and unexposed groups.

**Note:** An Explanation and Elaboration article discusses each checklist item and gives methodological background and published examples of transparent reporting. The STROBE checklist is best used in conjunction with this article (freely available on the Web sites of PLoS Medicine at <http://www.plosmedicine.org/>, Annals of Internal Medicine at <http://www.annals.org/>, and Epidemiology at <http://www.epidem.com/>). Information on the STROBE Initiative is available at [www.strobe-statement.org](http://www.strobe-statement.org).

# Standards for Reporting Qualitative Research (SRQR)\*

<http://www.equator-network.org/reporting-guidelines/srqr/>

Page/line no(s).

## Title and abstract

|                                                                                                                                                                                                                                                              |                          |
|--------------------------------------------------------------------------------------------------------------------------------------------------------------------------------------------------------------------------------------------------------------|--------------------------|
| <p><b>Title</b> - Concise description of the nature and topic of the study Identifying the study as qualitative or indicating the approach (e.g., ethnography, grounded theory) or data collection methods (e.g., interview, focus group) is recommended</p> | <p>Page 1/Line 1</p>     |
| <p><b>Abstract</b> - Summary of key elements of the study using the abstract format of the intended publication; typically includes background, purpose, methods, results, and conclusions</p>                                                               | <p>Page 1/Line 14-36</p> |

## Introduction

|                                                                                                                                                                     |                          |
|---------------------------------------------------------------------------------------------------------------------------------------------------------------------|--------------------------|
| <p><b>Problem formulation</b> - Description and significance of the problem/phenomenon studied; review of relevant theory and empirical work; problem statement</p> | <p>Page 2/Line 53-77</p> |
| <p><b>Purpose or research question</b> - Purpose of the study and specific objectives or questions</p>                                                              | <p>Page 2/Line 80-82</p> |

## Methods

|                                                                                                                                                                                                                                                                                                                                                                                                             |                             |
|-------------------------------------------------------------------------------------------------------------------------------------------------------------------------------------------------------------------------------------------------------------------------------------------------------------------------------------------------------------------------------------------------------------|-----------------------------|
| <p><b>Qualitative approach and research paradigm</b> - Qualitative approach (e.g., ethnography, grounded theory, case study, phenomenology, narrative research) and guiding theory if appropriate; identifying the research paradigm (e.g., postpositivist, constructivist/ interpretivist) is also recommended; rationale**</p>                                                                            | <p>Page 2/Line 98</p>       |
| <p><b>Researcher characteristics and reflexivity</b> - Researchers' characteristics that may influence the research, including personal attributes, qualifications/experience, relationship with participants, assumptions, and/or presuppositions; potential or actual interaction between researchers' characteristics and the research questions, approach, methods, results, and/or transferability</p> | <p>Page 3/ Line 116-119</p> |
| <p><b>Context</b> - Setting/site and salient contextual factors; rationale**</p>                                                                                                                                                                                                                                                                                                                            | <p>Page 3/ Line 85-93</p>   |
| <p><b>Sampling strategy</b> - How and why research participants, documents, or events were selected; criteria for deciding when no further sampling was necessary (e.g., sampling saturation); rationale**</p>                                                                                                                                                                                              | <p>Page 3/ Line 114-121</p> |
| <p><b>Ethical issues pertaining to human subjects</b> - Documentation of approval by an appropriate ethics review board and participant consent, or explanation for lack thereof; other confidentiality and data security issues</p>                                                                                                                                                                        | <p>Page 3/Line 100-102</p>  |
| <p><b>Data collection methods</b> - Types of data collected; details of data collection procedures including (as appropriate) start and stop dates of data collection and analysis, iterative process, triangulation of sources/methods, and modification of procedures in response to evolving study findings; rationale**</p>                                                                             | <p>Page 3/ Line 114-125</p> |

|    |                                                                                         |              |
|----|-----------------------------------------------------------------------------------------|--------------|
| 1  |                                                                                         |              |
| 2  |                                                                                         |              |
| 3  | <b>Data collection instruments and technologies</b> - Description of instruments (e.g., | Page 3/Line  |
| 4  | interview guides, questionnaires) and devices (e.g., audio recorders) used for data     | 148-150      |
| 5  | collection; if/how the instrument(s) changed over the course of the study               |              |
| 6  |                                                                                         |              |
| 7  | <b>Units of study</b> - Number and relevant characteristics of participants, documents, | Page 3/ Line |
| 8  | or events included in the study; level of participation (could be reported in results)  | 114-116      |
| 9  |                                                                                         |              |
| 10 | <b>Data processing</b> - Methods for processing data prior to and during analysis,      | Page 3/ Line |
| 11 | including transcription, data entry, data management and security, verification of      | 156-167      |
| 12 | data integrity, data coding, and anonymization/de-identification of excerpts            |              |
| 13 |                                                                                         |              |
| 14 | <b>Data analysis</b> - Process by which inferences, themes, etc., were identified and   | Page 3/ Line |
| 15 | developed, including the researchers involved in data analysis; usually references a    | 158-160      |
| 16 | specific paradigm or approach; rationale**                                              |              |
| 17 |                                                                                         |              |
| 18 | Techniques to enhance trustworthiness - Techniques to enhance trustworthiness           | Page 3/ Line |
| 19 | and credibility of data analysis (e.g., member checking, audit trail, triangulation);   | 160/163      |
| 20 | rationale**                                                                             |              |

## Results/findings

|    |                                                                                             |              |
|----|---------------------------------------------------------------------------------------------|--------------|
| 21 |                                                                                             |              |
| 22 |                                                                                             |              |
| 23 | <b>Synthesis and interpretation</b> - Main findings (e.g., interpretations, inferences, and | Page 7/ Line |
| 24 | themes); might include development of a theory or model, or integration with                | 209-215      |
| 25 | prior research or theory                                                                    |              |
| 26 |                                                                                             |              |
| 27 | <b>Links to empirical data</b> - Evidence (e.g., quotes, field notes, text excerpts,        | Page 8/Line  |
| 28 | photographs) to substantiate analytic findings                                              | 218-261      |
| 29 |                                                                                             |              |

## Discussion

|    |                                                                                           |              |
|----|-------------------------------------------------------------------------------------------|--------------|
| 30 |                                                                                           |              |
| 31 |                                                                                           |              |
| 32 | <b>Integration with prior work, implications, transferability, and contribution(s) to</b> |              |
| 33 | <b>the field</b> - Short summary of main findings; explanation of how findings and        |              |
| 34 | conclusions connect to, support, elaborate on, or challenge conclusions of earlier        |              |
| 35 | scholarship; discussion of scope of application/generalizability; identification of       | Page 10/Line |
| 36 | unique contribution(s) to scholarship in a discipline or field                            | 279-319      |
| 37 |                                                                                           |              |
| 38 |                                                                                           | Page 11/Line |
| 39 | <b>Limitations</b> - Trustworthiness and limitations of findings                          | 353-356      |
| 40 |                                                                                           |              |

## Other

|    |                                                                                            |              |
|----|--------------------------------------------------------------------------------------------|--------------|
| 41 |                                                                                            |              |
| 42 |                                                                                            |              |
| 43 | <b>Conflicts of interest</b> - Potential sources of influence or perceived influence on    | Page 12/Line |
| 44 | study conduct and conclusions; how these were managed                                      | 386          |
| 45 |                                                                                            |              |
| 46 | <b>Funding</b> - Sources of funding and other support; role of funders in data collection, | Page 12/Line |
| 47 | interpretation, and reporting                                                              | 381-383      |
| 48 |                                                                                            |              |

\*The authors created the SRQR by searching the literature to identify guidelines, reporting standards, and critical appraisal criteria for qualitative research; reviewing the reference lists of retrieved sources; and contacting experts to gain feedback. The SRQR aims to improve the transparency of all aspects of qualitative research by providing clear standards for reporting qualitative research.

1  
2  
3  
4  
5  
6  
7  
8  
9  
10  
11  
12  
13  
14  
15  
16  
17  
18  
19  
20  
21  
22  
23  
24  
25  
26  
27  
28  
29  
30  
31  
32  
33  
34  
35  
36  
37  
38  
39  
40  
41  
42  
43  
44  
45  
46  
47  
48  
49  
50  
51  
52  
53  
54  
55  
56  
57  
58  
59  
60

\*\*The rationale should briefly discuss the justification for choosing that theory, approach, method, or technique rather than other options available, the assumptions and limitations implicit in those choices, and how those choices influence study conclusions and transferability. As appropriate, the rationale for several items might be discussed together.

**Reference:**

O'Brien BC, Harris IB, Beckman TJ, Reed DA, Cook DA. **Standards for reporting qualitative research: a synthesis of recommendations.** *Academic Medicine*, Vol. 89, No. 9 / Sept 2014  
DOI: 10.1097/ACM.0000000000000388

For peer review only
